# Supplementary material for: A novel multi-omics-based highly accurate prediction of symptoms, comorbid conditions, and possible long-term complications of COVID-19
Source: Royal Society of Chemistry journal article supplement (doi:10.1039/d0mo00189a), 2021-02-18
Supplement: d0mo00189a1.xlsx [file d0mo00189a1.xlsx]

## Sheet: M
Data Conbinations	DBs	Rank	Name	Parent	Parent Count of occurrence	Child	Child Count of occurrence	Specific disease name	Specific disease Count of occurrence	Short/ Mid/ Long/ Congenital/ Infant (onset time)	P-value	Adjusted p-value	Odds Ratio	Combined score
(T-2)	OMIM Expanded	1	blood	Abnormal sign or symptom	118	Blood	59	Blood	4	Short / Mid	0.0003216	0.06013	2.66	21.36
(P+T)	OMIM Expanded	1	blood	Abnormal sign or symptom	118	Blood	59	Blood	4	Short / Mid	8.503e-05	0.0159	2.65	24.86
(I+P+T)	OMIM Expanded	1	blood	Abnormal sign or symptom	118	Blood	59	Blood	4	Short / Mid	6.705e-06	0.001254	2.69	32.01
(I+P+T+B)	OMIM Expanded	1	blood	Abnormal sign or symptom	118	Blood	59	Blood	4	Short / Mid	9.578e-12	1.791e-09	3.17	80.4
(T-2)	GWAS Catalog	1	Circulating myeloperoxidase levels (serum)	Abnormal sign or symptom	118	Blood	59	Circulating myeloperoxidase levels (serum)	4	Short	0.0004726	0.1642	9.38	71.83
(P+T)	GWAS Catalog	1	Circulating myeloperoxidase levels (serum)	Abnormal sign or symptom	118	Blood	59	Circulating myeloperoxidase levels (serum)	4	Short	0.0009155	0.3181	7.89	55.17
(I+P+T)	GWAS Catalog	1	Circulating myeloperoxidase levels (serum)	Abnormal sign or symptom	118	Blood	59	Circulating myeloperoxidase levels (serum)	4	Short	0.002101	0.6083	6.33	39
(T-1)	PheWeb	1	Nonspecific findings on examination of blood	Abnormal sign or symptom	118	Blood	59	Nonspecific findings on examination of blood	2	Short	0.001936	1	30.3	189.3
(T-2)	PheWeb	1	Painful respiration	Abnormal sign or symptom	118	Lung function	7	Painful respiration	4	Short / Mid	0.001958	1	6.82	42.54
(P+T)	PheWeb	1	Painful respiration	Abnormal sign or symptom	118	Lung function	7	Painful respiration	4	Short / Mid	0.0037	1	5.74	32.12
(I+P+T)	PheWeb	1	Painful respiration	Abnormal sign or symptom	118	Lung function	7	Painful respiration	4	Short / Mid	0.00817	1	4.6	22.11
(B)	GWAS Catalog	2	Total bilirubin levels	Abnormal sign or symptom	118	Blood	59	Liver enzyme levels - Total bilirubin levels	2	Short	3.021e-07	0.0001312	10.74	161.21
(T-2)	GWAS Catalog	2	Matrix metalloproteinase-8 levels	Abnormal sign or symptom	118	Blood	59	Matrix metalloproteinase-8 levels	3	Short	0.0008147	0.2022	8.34	59.31
(P+T)	GWAS Catalog	2	Matrix metalloproteinase-8 levels	Abnormal sign or symptom	118	Blood	59	Matrix metalloproteinase-8 levels	3	Short	0.001565	0.4532	7.01	45.28
(I+P+T)	GWAS Catalog	2	Matrix metalloproteinase-8 levels	Abnormal sign or symptom	118	Blood	59	Matrix metalloproteinase-8 levels	3	Short	0.003546	0.77	5.62	31.72
(T-1)	GWAS Catalog	2	Plasma PCSK9 levels in stable coronary artery disease	Abnormal sign or symptom	118	Blood	59	Plasma PCSK9 levels in stable coronary artery disease	3	Short	0.001683	0.9744	32.47	207.38
(I+P+T)	GWAS Catalog	3	Lipoprotein-associated phospholipase A2 activity and mass	Abnormal sign or symptom	118	Blood	59	Lipoprotein-associated phospholipase A2 activity and mass	4	Short	0.003351	0.8314	4.52	25.75
(I+P+T+B)	GWAS Catalog	3	Total bilirubin levels	Abnormal sign or symptom	118	Blood	59	Liver enzyme levels - Total bilirubin levels	2	Short	0.0001413	0.0491	4.03	35.71
(T-2)	GWAS Catalog	3	Mean corpuscular hemoglobin concentration	Abnormal sign or symptom	118	Blood	59	Reticulocyte fraction of red cells - High light scatter reticulocyte percentage of red cells	11	Short	2.525e-05	0.04387	2.82	29.87
(T-2)	PheWeb	3	Transient alteration of awareness	Abnormal sign or symptom	118	Fatigue	5	Transient alteration of awareness	4	Short / Mid	0.06415	1	4.69	12.88
(I)	DisGeNET	3	Temperature instability	Abnormal sign or symptom	118	Fever	10	Fever	10	Short	0.003943	0.6151	20.08	111.16
(T-1)	GWAS Catalog	4	Amyloid A serum levels	Abnormal sign or symptom	118	Blood	59	Amyloid A serum levels	1	Short	0.02181	1	45.45	173.88
(I)	GWAS Catalog	4	Plasma plasminogen activator levels	Abnormal sign or symptom	118	Blood	59	Plasma plasminogen activator levels	2	Short	0.0803	1	12.05	30.39
(P+T)	GWAS Catalog	4	Mean corpuscular hemoglobin concentration	Abnormal sign or symptom	118	Blood	59	Reticulocyte fraction of red cells - High light scatter reticulocyte percentage of red cells	11	Short	9.471e-05	0.1645	2.49	23.07
(I)	DisGeNET	4	Body temperature instability	Abnormal sign or symptom	118	Fever	10	Fever	10	Short	0.003943	0.6055	20.08	111.16
(B)	TopFun	4	Pain	Abnormal sign or symptom	118	Pain	9	Pain	9	Short	7.593e-138
(I)	TopGene	4	Pain	Abnormal sign or symptom	118	Pain	9	Pain	9	Short	7.593e-138
(T-1)	TopGene	4	Pain	Abnormal sign or symptom	118	Pain	9	Pain	9	Short	7.593e-138
(P+T)	TopGene	4	Pain	Abnormal sign or symptom	118	Pain	9	Pain	9	Short	7.593e-138
(P+T+I)	TopGene	4	Pain	Abnormal sign or symptom	118	Pain	9	Pain	9	Short	7.593e-138
(P)	TopGene	4	Pain	Abnormal sign or symptom	118	Pain	9	Pain	9	Short	7.593e-138
(T-2)	TopGene	4	Pain	Abnormal sign or symptom	118	Pain	9	Pain	9	Short	7.593e-138
(P)	PheWeb	4	Throat pain	Abnormal sign or symptom	118	Throat	7	Throat pain / Strep throat	2	Short	0.08491	1	11.31	27.9
(I)	DisGeNET	5	Bone-marrow foam cells	Abnormal sign or symptom	118	Blood	59	Bone-marrow foam cells	1	Mid / Long	0.003943	0.5962	20.08	111.16
(I+P+T)	GWAS Catalog	5	Metabolite levels (lipoprotein measures)	Abnormal sign or symptom	118	Blood	59	lipoprotein level	3	Short	0.00413	0.7971	3.28	18
(I+P+T+B)	PheWeb	5	Painful respiration	Abnormal sign or symptom	118	Lung function	7	Painful respiration	4	Short / Mid	0.02687	1	3.26	11.77
(T-2)	DisGeNET	5	Epiglottitis	Abnormal sign or symptom	118	Throat	7	Epiglottitis	3	Short	0.0001104	0.01528	12.51	113.96
(T-2)	DisGeNET	6	Spherocytosis	Abnormal sign or symptom	118	Blood	59	abnormal erythrocyte morphology - Spherocytosis	3	Short / Mid / Long	0.0001104	0.01507	12.51	113.96
(I+P+T)	GWAS Catalog	6	Lipoprotein phospholipase A2 activity in cardiovascular disease	Abnormal sign or symptom	118	Blood	59	Lipoprotein phospholipase A2 activity in cardiovascular disease	1	Short	0.01558	1	3.89	16.2
(T-2)	GWAS Catalog	6	Lipoprotein-associated phospholipase A2 activity and mass	Abnormal sign or symptom	118	Blood	59	Lipoprotein-associated phospholipase A2 activity and mass	4	Short	0.005225	0.6482	5.36	28.17
(I+P+T+B)	GWAS Catalog	6	Lactate dehydrogenase levels	Abnormal sign or symptom	118	Blood	59	Liver enzyme levels - Lactate dehydrogenase levels	1	Short	0.0009802	0.09459	4.48	31.01
(B)	PheWeb	6	Abnormal chest sounds	Abnormal sign or symptom	118	Chest	4	Abnormal chest sounds	3	Short	0.01378	1	5.75	24.65
(I)	GWAS Catalog	6	Response to exercise (triglyceride level interaction)	Abnormal sign or symptom	118	Fatigue	5	Response to stress	1	Short / Mid	0.0803	1	12.05	30.39
(P+T)	PheWeb	6	Transient alteration of awareness	Abnormal sign or symptom	118	Fatigue	5	Transient alteration of awareness	4	Short / Mid	0.08714	1	3.94	9.62
(T-2)	PheWeb	6	Abnormal results of other function studies (bladder, pancreas, placenta, spleen, etc)	Abnormal sign or symptom	118	Other	10	Abnormal results of other function studies (bladder, pancreas, placenta, spleen, etc)	2	Short / Mid	0.05029	1	3.52	10.52
(P+T)	PheWeb	7	Nonspecific findings on examination of blood	Abnormal sign or symptom	118	Blood	59	Nonspecific findings on examination of blood	2	Short	0.06529	1	3.15	8.61
(P+T+I+B)	TopFun	7	Pain	Abnormal sign or symptom	118	Pain	9	Pain	9	Short	5.12e-89
(P)	PheWeb	8	Poisoning by agents primarily affecting blood constituents	Abnormal sign or symptom	118	Blood	59	Poisoning by agents primarily affecting blood constituents	1	Short / Mid	0.09113	1	10.5	25.16
(I+P+T)	GWAS Catalog	8	Reticulocyte fraction of red cells	Abnormal sign or symptom	118	Blood	59	Reticulocyte fraction of red cells	11	Short	0.0004244	0.7371	1.97	15.28
(T-1)	GWAS Catalog	8	Neutrophil count in HIV-infection	Abnormal sign or symptom	118	Blood	59	Neutrophil count in HIV-infection	1	Short	0.02611	1	37.88	138.08
(P)	GEO up	8	Tachycardia C0039231 rat GSE7999 sample 244	Abnormal sign or symptom	118	Other	10	Tachycardia	1	Mid / Long	3.52e-23	7.382e-21	11.25	581.87
(P+T)	GWAS Catalog	9	Lipoprotein-associated phospholipase A2 activity and mass	Abnormal sign or symptom	118	Blood	59	Lipoprotein-associated phospholipase A2 activity and mass	4	Short	0.009634	1	4.51	20.92
(T-2)	GWAS Catalog	9	High light scatter reticulocyte percentage of red cells	Abnormal sign or symptom	118	Blood	59	Reticulocyte fraction of red cells - High light scatter reticulocyte percentage of red cells	11	Short	4.443e-05	0.03859	2.51	25.14
(I+P+T)	GWAS Catalog	9	Immature fraction of reticulocytes	Abnormal sign or symptom	118	Blood	59	Reticulocyte fraction of red cells - High light scatter reticulocyte percentage of red cells	11	Short / Mid	0.0007745	0.6726	2.13	15.22
(I)	GWAS Catalog	9	Vitamin E levels	Abnormal sign or symptom	118	Blood	59	Vitamin E levels	1	Short	0.0803	1	12.05	30.39
(T-2)	PheWeb	9	Keratitis	Abnormal sign or symptom	118	Eye Disease	4	Keratitis	2	Short	0.04154	1	3	9.55
(T-2)	DisGeNET	9	Chronic ulcer	Abnormal sign or symptom	118	Other	10	Cell and tissue damage - Chronic ulcer	1	Short / Mid	7.463e-05	0.01287	7.5	71.32
(P+T)	PheWeb	9	Abnormal results of other function studies (bladder, pancreas, placenta, spleen, etc)	Abnormal sign or symptom	118	Other	10	Abnormal results of other function studies (bladder, pancreas, placenta, spleen, etc)	2	Short / Mid	0.0767	1	2.96	7.59
(I+P+T)	PheWeb	10	Dependence on respirator [Ventilator] or supplemental oxygen	Abnormal sign or symptom	118	Lung function	7	Dependence on respirator [Ventilator]	1	Short	0.06326	1	3.16	8.73
(P+T)	DisGeNET	10	Epiglottitis	Abnormal sign or symptom	118	Throat	7	Epiglottitis	3	Short	0.0002175	0.00902	10.52	88.68
(I+P+T)	DisGeNET	10	Epiglottitis	Abnormal sign or symptom	118	Throat	7	Epiglottitis	3	Short	0.0005124	0.02387	8.43	63.89
(P+T)	DisGeNET	11	Spherocytosis	Abnormal sign or symptom	118	Blood	59	abnormal erythrocyte morphology - Spherocytosis	3	Short / Mid / Long	0.0002175	0.008982	10.52	88.68
(I+P+T)	DisGeNET	11	Spherocytosis	Abnormal sign or symptom	118	Blood	59	abnormal erythrocyte morphology - Spherocytosis	3	Short / Mid / Long	0.0005124	0.02376	8.43	63.89
(T-2)	GWAS Catalog	11	Metabolite levels (lipoprotein measures)	Abnormal sign or symptom	118	Blood	59	lipoprotein level	3	Short	0.002547	0.4022	4.17	24.9
(I+P+T+B)	GWAS Catalog	11	Liver enzyme levels	Abnormal sign or symptom	118	Blood	59	Liver enzyme levels	2	Short	0.0005805	0.07202	3.77	28.09
(P+T)	GWAS Catalog	11	Plasma PCSK9 levels in stable coronary artery disease	Abnormal sign or symptom	118	Blood	59	Plasma PCSK9 levels in stable coronary artery disease	3	Short	0.009634	0.9844	4.51	20.92
(I+P+T+B)	GWAS Catalog	12	Hemoglobin levels	Abnormal sign or symptom	118	Blood	59	Hemoglobin levels	2	Short / Mid	0.0001896	0.04117	3.16	27.08
(T-2)	GWAS Catalog	12	Immature fraction of reticulocytes	Abnormal sign or symptom	118	Blood	59	Reticulocyte fraction of red cells - High light scatter reticulocyte percentage of red cells	11	Short / Mid	0.0001121	0.04869	2.7	24.57
(I)	PheWeb	12	Nonspecific chest pain	Abnormal sign or symptom	118	Chest	4	Nonspecific chest pain	1	Short / Mid / Long	0.03901	1	6.34	20.57
(B)	TopFun	12	Fever	Abnormal sign or symptom	118	Fever	10	Fever	10	Short	4.173e-121
(I)	TopGene	12	Fever	Abnormal sign or symptom	118	Fever	10	Fever	10	Short	4.173e-121
(T-1)	TopGene	12	Fever	Abnormal sign or symptom	118	Fever	10	Fever	10	Short	4.173e-121
(P+T)	TopGene	12	Fever	Abnormal sign or symptom	118	Fever	10	Fever	10	Short	4.173e-121
(P+T+I)	TopGene	12	Fever	Abnormal sign or symptom	118	Fever	10	Fever	10	Short	4.173e-121
(P)	TopGene	12	Fever	Abnormal sign or symptom	118	Fever	10	Fever	10	Short	4.173e-121
(T-2)	TopGene	12	Fever	Abnormal sign or symptom	118	Fever	10	Fever	10	Short	4.173e-121
(P)	GWAS Catalog	12	Bone mineral density (spine) and age at menarche	Abnormal sign or symptom	118	Other	10	Bone mineral density	2	Mid / Long	0.04012	1	24.51	78.82
(T-2)	GWAS Catalog	13	Plasma parathyroid hormone levels	Abnormal sign or symptom	118	Blood	59	Plasma parathyroid hormone levels	2	Short	0.004239	0.5664	4.47	24.41
(P+T)	GWAS Catalog	13	Reticulocyte fraction of red cells	Abnormal sign or symptom	118	Blood	59	Reticulocyte fraction of red cells	11	Short	0.0001815	0.1576	2.19	18.87
(T-1)	GWAS Catalog	13	Bone mineral density (spine) and age at menarche	Abnormal sign or symptom	118	Other	10	Bone mineral density	2	Mid / Long	0.02611	1	37.88	138.08
(T-2)	GWAS Catalog	14	Hemoglobin levels	Abnormal sign or symptom	118	Blood	59	Hemoglobin levels	2	Short / Mid	0.001816	0.3154	3.86	24.38
(P+T)	GWAS Catalog	14	High light scatter reticulocyte percentage of red cells	Abnormal sign or symptom	118	Blood	59	Reticulocyte fraction of red cells - High light scatter reticulocyte percentage of red cells	11	Short	0.0002254	0.1305	2.2	18.48
(P)	PheWeb	14	Abnormal results of function study of pulmonary system	Abnormal sign or symptom	118	Chest	4	Abnormal chest sounds	3	Short	0.1035	1	9.19	20.85
(P)	GWAS Catalog	14	Feeling tense	Abnormal sign or symptom	118	Mental health	3	Feeling tense	1	Short / Mid / Long	0.007276	1	15.48	76.21
(I+P+T+B)	GWAS Catalog	14	Blond vs. brown hair color	Abnormal sign or symptom	118	Other	10	Blond vs. brown hair color	1	Mid / Long	0.01169	0.3443	5.37	23.9
(B)	GWAS Catalog	14	Strep throat	Abnormal sign or symptom	118	Throat	7	Throat pain / Strep throat	2	Short	0.0009463	0.04109	13.42	93.46
(P+T)	GWAS Catalog	15	D-dimer levels	Abnormal sign or symptom	118	Blood	59	D-dimer levels	1	Short	0.01249	1	4.21	18.44
(I+P+T)	GWAS Catalog	15	Plasma plasminogen activator levels	Abnormal sign or symptom	118	Blood	59	Plasma plasminogen activator levels	2	Short	0.05316	1	5.06	14.85
(T-2)	GWAS Catalog	15	Plasminogen activator inhibitor type 1 levels (PAI-1)	Abnormal sign or symptom	118	Blood	59	Plasminogen activator inhibitor type 1 levels (PAI-1)	2	Short	0.01366	0.9889	5.63	24.16
(P)	PheWeb	15	Postnasal drip	Abnormal sign or symptom	118	Other	10	Postnasal drip	1	Short	0.1035	1	9.19	20.85
(T-1)	DisGeNET	15	Common Cold	Abnormal sign or symptom	118	Throat	7	Cold sores	2	Short	4.422e-05	0.01499	42.61	427.26
(I+P+T+B)	GWAS Catalog	16	Lipoprotein-associated phospholipase A2 activity and mass	Abnormal sign or symptom	118	Blood	59	Lipoprotein-associated phospholipase A2 activity and mass	4	Short	0.002614	0.1816	3.84	22.82
(T-2)	GWAS Catalog	16	Reticulocyte fraction of red cells	Abnormal sign or symptom	118	Blood	59	Reticulocyte fraction of red cells	11	Short	9.053e-05	0.05242	2.4	22.32
(I+P+T)	PheWeb	16	Allergic conjunctivitis	Abnormal sign or symptom	118	Eye Disease	4	Allergic conjunctivitis	2	Short	0.05003	1	2.43	7.29
(T-1)	GWAS Catalog	16	Lung function (forced vital capacity)	Abnormal sign or symptom	118	Lung function	7	forced vital capacity	1	Short / Mid / Long	0.0304	1	32.47	113.42
(B)	Rare Diseases	16	Bubonic plague	Abnormal sign or symptom	118	Other	10	Flue like - Bubonic plague	1	Short	3.7e-10	5.19e-08	3.89	84.54
(I)	GWAS Catalog	16	Possible neuropathic pain in post total joint replacement surgery for osteoarthritis	Abnormal sign or symptom	118	Pain	9	Possible neuropathic pain	9	Short / Mid / Long	0.09557	1	10.04	23.57
(B)	GWAS Catalog	16	Cold sores	Abnormal sign or symptom	118	Throat	7	Cold sores	2	Short	0.0003351	0.02007	10.74	85.92
(B)	GWAS Catalog	17	Liver enzyme levels	Abnormal sign or symptom	118	Blood	59	Liver enzyme levels	2	Short	4.685e-05	0.005426	8.48	84.51
(I+P+T)	GWAS Catalog	17	Plasma PCSK9 levels in stable coronary artery disease	Abnormal sign or symptom	118	Blood	59	Plasma PCSK9 levels in stable coronary artery disease	3	Short	0.02048	1	3.61	14.05
(P+T)	PheWeb	17	Anxiety disorder	Abnormal sign or symptom	118	Mental health	3	Anxiety disorder	1	Mid / Long	0.07024	1	2.52	6.7
(B)	PheWeb	17	Other disorders of cervical region	Abnormal sign or symptom	118	Other	10	Disorders of cervical region	1	Mid / Long	0.05114	1	5.37	15.96
(I+P+T+B)	GWAS Catalog	18	Circulating myeloperoxidase levels (serum)	Abnormal sign or symptom	118	Blood	59	Circulating myeloperoxidase levels (serum)	4	Short	0.007498	0.296	4.48	21.9
(P+T)	GWAS Catalog	18	Plasminogen activator inhibitor type 1 levels (PAI-1)	Abnormal sign or symptom	118	Blood	59	Plasminogen activator inhibitor type 1 levels (PAI-1)	2	Short	0.02179	1	4.73	18.11
(P)	GEO up	18	Purpura, Idiopathic Thrombocytopenic C0043117 human GSE574 sample 358	Abnormal sign or symptom	118	Blood	59	Purpura, Idiopathic Thrombocytopenic	1	Short	1.54e-21	1.615e-19	8.86	424.71
(I+P+T+B)	PheWeb	18	Abnormal chest sounds	Abnormal sign or symptom	118	Chest	4	Abnormal chest sounds	3	Short	0.06222	1	2.56	7.1
(P+T)	PheWeb	18	Keratitis	Abnormal sign or symptom	118	Eye Disease	4	Keratitis	2	Short	0.07024	1	2.52	6.7
(I+P+T)	PheWeb	18	Transient alteration of awareness	Abnormal sign or symptom	118	Fatigue	5	Transient alteration of awareness	4	Short / Mid	0.1272	1	3.16	6.52
(P+T)	GWAS Catalog	19	Metabolite levels (lipoprotein measures)	Abnormal sign or symptom	118	Blood	59	lipoprotein level	3	Short	0.006	0.9475	3.51	17.93
(I+P+T)	GWAS Catalog	19	High light scatter reticulocyte percentage of red cells	Abnormal sign or symptom	118	Blood	59	Reticulocyte fraction of red cells - High light scatter reticulocyte percentage of red cells	11	Short	0.001033	0.4485	1.91	13.15
(I)	PheWeb	19	Alteration of consciousness	Abnormal sign or symptom	118	Fatigue	5	Transient alteration of awareness	4	Short / Mid	0.05528	1	5.24	15.17
(T-1)	TopFun	19	Severe Fever with Thrombocytopenia Syndrome	Abnormal sign or symptom	118	Fever	10	Severe Fever with Thrombocytopenia Syndrome	10	Short	8.743e-08
(B)	PheWeb	19	Other dyspnea	Abnormal sign or symptom	118	Lung function	7	Dyspnea (Other)	1	Short	0.01921	1	3.84	15.16
(B)	GWAS Catalog	20	Beta-2 microglubulin plasma levels	Abnormal sign or symptom	118	Blood	59	Beta-2 microglubulin plasma levels	1	Short	0.00161	0.06504	11.51	74
(P+T)	GWAS Catalog	20	Plasma parathyroid hormone levels	Abnormal sign or symptom	118	Blood	59	Plasma parathyroid hormone levels	2	Short	0.008805	1	3.76	17.77
(I+P+T+B)	GWAS Catalog	20	High light scatter reticulocyte percentage of red cells	Abnormal sign or symptom	118	Blood	59	Reticulocyte fraction of red cells - High light scatter reticulocyte percentage of red cells	11	Short	2.781e-05	0.0161	1.98	20.75
(P+T)	PheWeb	20	Allergic conjunctivitis	Abnormal sign or symptom	118	Eye Disease	4	Allergic conjunctivitis	2	Short	0.07903	1	2.43	6.16
(T-1)	PheWeb	20	Tension headache	Abnormal sign or symptom	118	Mental health	3	Tension headache	1	Short / Mid / Long	0.07634	1	12.63	32.48
(P)	GWAS Catalog	1	Suicide behavior	Behavior process	7	Suicide behavior	1	Suicide behavior	1	Mid / Long	0.03354	1	29.41	99.85
(P)	GWAS Catalog	6	Eating disorders (purging via substances)	Behavior process	7	Eating disorders	1	Eating disorders (purging via substances)	1	Mid / Long	0.005175	1	18.38	96.76
(T-1)	GWAS Catalog	10	Alcohol consumption (drinkers vs non-drinkers)	Behavior process	7	Addiction	4	Alcohol consumption	2	Mid / Long	0.02611	1	37.88	138.08
(I)	DisGeNET	15	Phencyclidine Abuse	Behavior process	7	Addiction	4	Phencyclidine Abuse	1	Mid / Long	0.0072	0.6804	15.06	74.3
(T-2)	GWAS Catalog	18	Alcohol consumption (drinkers vs non-drinkers)	Behavior process	7	Addiction	4	Alcohol consumption	2	Mid / Long	0.03689	1	6.25	20.64
(P)	GWAS Catalog	19	Cocaine dependence	Behavior process	7	Addiction	4	Cocaine dependence	1	Mid / Long	0.05313	1	18.38	53.95
(I)	GWAS Catalog	20	Leisure-time exercise behaviour (age-stratified)	Behavior process	7	Exercise behaviour	1	Leisure-time exercise behaviour	1	Mid / Long	0.09557	1	10.04	23.57
(P)	PheWeb	1	Nonrheumatic mitral valve disorders	Cardiovascular System Disease	103	Valve disease	1	Nonrheumatic mitral valve disorders	1	Mid / Long	0.01653	1	10.14	41.61
(I+P+T+B)	DisGeNET	2	Aortic Aneurysm, Abdominal	Cardiovascular System Disease	103	Vascular disease	53	Aortic Aneurysm, Abdominal	4	Mid / Long	3.663e-47	7.66e-45	3.98	425.44
(T-2)	TopFun	2	Arteriosclerosis	Cardiovascular System Disease	103	Vascular disease	53	Arteriosclerosis	12	Mid / Long	2.44e-15
(B)	TopFun	2	Hypertensive disease	Cardiovascular System Disease	103	Vascular disease	53	Hypertensive disease	8	Mid / Long	3.372e-146
(I)	TopGene	2	Hypertensive disease	Cardiovascular System Disease	103	Vascular disease	53	Hypertensive disease	8	Mid / Long	3.372e-146
(T-1)	TopGene	2	Hypertensive disease	Cardiovascular System Disease	103	Vascular disease	53	Hypertensive disease	8	Mid / Long	3.372e-146
(P+T)	TopGene	2	Hypertensive disease	Cardiovascular System Disease	103	Vascular disease	53	Hypertensive disease	8	Mid / Long	3.372e-146
(P+T+I)	TopGene	2	Hypertensive disease	Cardiovascular System Disease	103	Vascular disease	53	Hypertensive disease	8	Mid / Long	3.372e-146
(P)	TopGene	2	Hypertensive disease	Cardiovascular System Disease	103	Vascular disease	53	Hypertensive disease	8	Mid / Long	3.372e-146
(T-2)	TopGene	2	Hypertensive disease	Cardiovascular System Disease	103	Vascular disease	53	Hypertensive disease	8	Mid / Long	3.372e-146
(I+P+T+B)	GWAS Catalog	2	Thrombosis	Cardiovascular System Disease	103	Vascular disease	53	Thrombosis	7	Short / Mid / Long	7.102e-06	0.01234	5.37	63.68
(T-1)	PheWeb	2	Embolism and thrombosis of abdominal aorta	Cardiovascular System Disease	103	Vascular disease	53	Thrombosis - Embolism and thrombosis of abdominal aorta	7	Short / Mid / Long	0.002494	1	26.74	160.27
(T-1)	OMIM Expanded	2	long qt syndrome	Cardiovascular System Disease	103	Cardiac channelopathy	6	long qt syndrome	4	Mid / Long	0.05744	1	5.17	14.76
(I)	GWAS Catalog	3	Common carotid intima-media thickness	Cardiovascular System Disease	103	Vascular disease	53	Arteriosclerosis	12	Mid / Long	0.02192	1	8.61	32.88
(B)	DisGeNET	3	Aortic Aneurysm, Abdominal	Cardiovascular System Disease	103	Vascular disease	53	Aortic Aneurysm, Abdominal	4	Mid / Long	1.471e-68	2.065e-66	9.23	1441.35
(T-2)	TopFun	3	Atherosclerosis	Cardiovascular System Disease	103	Vascular disease	53	Arteriosclerosis	12	Mid / Long	2.79e-15
(P+T+I+B)	TopFun	3	Hypertensive disease	Cardiovascular System Disease	103	Vascular disease	53	Hypertensive disease	8	Mid / Long	2.25e-92
(B)	TopFun	3	Cardiovascular Diseases	Cardiovascular System Disease	103	Cardiovascular Diseases	12	Cardiovascular Diseases	12	Short / Mid / Long	7.576e-139
(I)	TopGene	3	Cardiovascular Diseases	Cardiovascular System Disease	103	Cardiovascular Diseases	12	Cardiovascular Diseases	12	Short / Mid / Long	7.576e-139
(T-1)	TopGene	3	Cardiovascular Diseases	Cardiovascular System Disease	103	Cardiovascular Diseases	12	Cardiovascular Diseases	12	Short / Mid / Long	7.576e-139
(P+T)	TopGene	3	Cardiovascular Diseases	Cardiovascular System Disease	103	Cardiovascular Diseases	12	Cardiovascular Diseases	12	Short / Mid / Long	7.576e-139
(P+T+I)	TopGene	3	Cardiovascular Diseases	Cardiovascular System Disease	103	Cardiovascular Diseases	12	Cardiovascular Diseases	12	Short / Mid / Long	7.576e-139
(P)	TopGene	3	Cardiovascular Diseases	Cardiovascular System Disease	103	Cardiovascular Diseases	12	Cardiovascular Diseases	12	Short / Mid / Long	7.576e-139
(T-2)	TopGene	3	Cardiovascular Diseases	Cardiovascular System Disease	103	Cardiovascular Diseases	12	Cardiovascular Diseases	12	Short / Mid / Long	7.576e-139
(T-2)	DisGeNET	4	Dural Arteriovenous Fistula	Cardiovascular System Disease	103	Vascular disease	53	Dural Arteriovenous Fistula	3	Short / Mid / Long	0.0001104	0.0155	12.51	113.96
(P+T)	OMIM Expanded	4	long qt syndrome	Cardiovascular System Disease	103	Cardiac channelopathy	6	long qt syndrome	4	Mid / Long	0.02306	0.8625	1.97	7.43
(B)	TopFun	5	Cerebrovascular accident	Cardiovascular System Disease	103	Vascular disease	53	Cerebrovascular accident (stroke)	9	Short / Mid / Long	2.909e-127
(I)	TopGene	5	Cerebrovascular accident	Cardiovascular System Disease	103	Vascular disease	53	Cerebrovascular accident (stroke)	9	Short / Mid / Long	2.909e-127
(T-1)	TopGene	5	Cerebrovascular accident	Cardiovascular System Disease	103	Vascular disease	53	Cerebrovascular accident (stroke)	9	Short / Mid / Long	2.909e-127
(P+T)	TopGene	5	Cerebrovascular accident	Cardiovascular System Disease	103	Vascular disease	53	Cerebrovascular accident (stroke)	9	Short / Mid / Long	2.909e-127
(P+T+I)	TopGene	5	Cerebrovascular accident	Cardiovascular System Disease	103	Vascular disease	53	Cerebrovascular accident (stroke)	9	Short / Mid / Long	2.909e-127
(P)	TopGene	5	Cerebrovascular accident	Cardiovascular System Disease	103	Vascular disease	53	Cerebrovascular accident (stroke)	9	Short / Mid / Long	2.909e-127
(T-2)	TopGene	5	Cerebrovascular accident	Cardiovascular System Disease	103	Vascular disease	53	Cerebrovascular accident (stroke)	9	Short / Mid / Long	2.909e-127
(I+P+T+B)	GWAS Catalog	5	Giant cell arteritis	Cardiovascular System Disease	103	Vascular disease	53	Giant cell arteritis	2	Short / Mid / Long	0.00148	0.1224	4.97	32.41
(I+P+T)	OMIM Expanded	5	long qt syndrome	Cardiovascular System Disease	103	Cardiac channelopathy	6	long qt syndrome	4	Mid / Long	0.00359	0.1343	2.16	12.14
(P)	GWAS Catalog	5	Coronary heart disease (SNP X SNP interaction)	Cardiovascular System Disease	103	Cardiovascular Diseases	12	Cardiovascular Diseases	12	Short / Mid / Long	0.03354	1	29.41	99.85
(P+T+I+B)	TopFun	6	Cardiovascular Diseases	Cardiovascular System Disease	103	Cardiovascular Diseases	12	Cardiovascular Diseases	12	Short / Mid / Long	3.1e-89
(I)	OMIM Expanded	6	arrhythmogenic right ventricular dysplasia	Cardiovascular System Disease	103	Myocardial disorder	25	arrhythmogenic right ventricular dysplasia	2	Mid / Long	0.01707	0.5321	3.35	13.62
(P+T)	TopFun	7	Arteriosclerosis	Cardiovascular System Disease	103	Vascular disease	53	Arteriosclerosis	12	Mid / Long	4.528e-19
(P+T)	GWAS Catalog	7	Cervical artery dissection	Cardiovascular System Disease	103	Vascular disease	53	Carotid Atherosclerosis	6	Mid / Long	0.03532	1	6.31	21.09
(I)	PheWeb	7	Peripheral angiopathy in diseases classified elsewhere	Cardiovascular System Disease	103	Vascular disease	53	Peripheral angiopathy	1	Mid / Long	0.02501	1	8.03	29.63
(T-1)	GWAS Catalog	7	Cardiac repolarization	Cardiovascular System Disease	103	Electrical cardiac activity	4	Cardiac repolarization	1	Short / Mid / Long	0.02611	1	37.88	138.08
(P)	GWAS Catalog	7	Global electrical heterogeneity phenotypes	Cardiovascular System Disease	103	Electrical cardiac activity	4	Global electrical heterogeneity phenotypes	1	Short / Mid / Long	0.006539	1	16.34	82.19
(I+P+T)	GWAS Catalog	7	Coronary artery disease (myocardial infarction, PTCA, CABG, angina or CIHD)	Cardiovascular System Disease	103	Myocardial disorder	25	Myocardial infarction	9	Mid / Long	0.001026	0.5943	2.29	15.74
(T-2)	GWAS Catalog	7	Myocardial infarction (early onset)	Cardiovascular System Disease	103	Myocardial disorder	25	Myocardial infarction (early onset)	3	Mid / Long	0.005225	0.605	5.36	28.17
(I)	OMIM Expanded	8	Aneurysm	Cardiovascular System Disease	103	Vascular disease	53	Aneurysm	4	Mid / Long	0.02107	0.4924	3.17	12.24
(P+T)	TopFun	8	Atherosclerosis	Cardiovascular System Disease	103	Vascular disease	53	Arteriosclerosis	12	Mid / Long	5.349e-19
(T-2)	GWAS Catalog	8	Cervical artery dissection	Cardiovascular System Disease	103	Vascular disease	53	Carotid Atherosclerosis	6	Mid / Long	0.02548	1	7.5	27.54
(I+P+T)	PheWeb	8	Embolism and thrombosis of abdominal aorta	Cardiovascular System Disease	103	Vascular disease	53	Thrombosis - Embolism and thrombosis of abdominal aorta	7	Short / Mid / Long	0.04031	1	2.98	9.56
(P+T)	GWAS Catalog	8	Coronary heart disease (SNP X SNP interaction)	Cardiovascular System Disease	103	Cardiovascular Diseases	12	Cardiovascular Diseases	12	Short / Mid / Long	0.03532	1	6.31	21.09
(I+P+T+B)	Rare Diseases	8	Infectious myocarditis	Cardiovascular System Disease	103	Myocardial disorder	25	Infectious myocarditis	4	Mid / Long	6.248e-30	1.753e-27	3.8	255.86
(T-1)	PheWeb	8	Pericarditis	Cardiovascular System Disease	103	Pericardium disease	2	Pericarditis	2	Short / Mid / Long	0.007194	1	15.67	77.34
(B)	PheWeb	9	Atherosclerosis	Cardiovascular System Disease	103	Vascular disease	53	Arteriosclerosis	12	Mid / Long	0.0112	1	4.47	20.1
(P+T)	DisGeNET	9	Dural Arteriovenous Fistula	Cardiovascular System Disease	103	Vascular disease	53	Dural Arteriovenous Fistula	3	Short / Mid / Long	0.0002175	0.009058	10.52	88.68
(I+P+T)	DisGeNET	9	Dural Arteriovenous Fistula	Cardiovascular System Disease	103	Vascular disease	53	Dural Arteriovenous Fistula	3	Short / Mid / Long	0.0005124	0.02398	8.43	63.89
(P+T)	GEO up	9	cardiomyopathy DOID-0050700 human GSE9128 sample 781	Cardiovascular System Disease	103	Myocardial disorder	25	Cardiomyopathy	5	Mid / Long	2e-33	1.399e-31	4.57	343.99
(I+P+T)	GEO up	9	cardiomyopathy DOID-0050700 human GSE9128 sample 781	Cardiovascular System Disease	103	Myocardial disorder	25	Cardiomyopathy	5	Mid / Long	1.771e-29	1.486e-27	3.84	254.13
(I+P+T+B)	GEO up	9	cardiomyopathy DOID-0050700 human GSE9128 sample 781	Cardiovascular System Disease	103	Myocardial disorder	25	Cardiomyopathy	5	Mid / Long	2.017e-34	1.692e-32	3.46	268.26
(P+T)	Rare Diseases	9	Infectious myocarditis	Cardiovascular System Disease	103	Myocardial disorder	25	Infectious myocarditis	4	Mid / Long	8.039e-34	2.004e-31	5.52	420.68
(P+T+I+B)	TopFun	10	Cerebrovascular accident	Cardiovascular System Disease	103	Vascular disease	53	Cerebrovascular accident (stroke)	9	Short / Mid / Long	3.6e-86
(B)	GWAS Catalog	10	Giant cell arteritis	Cardiovascular System Disease	103	Vascular disease	53	Giant cell arteritis	2	Short / Mid / Long	0.0002072	0.01439	11.93	101.2
(P+T)	GWAS Catalog	10	Myocardial infarction (early onset)	Cardiovascular System Disease	103	Myocardial disorder	25	Myocardial infarction (early onset)	3	Mid / Long	0.009634	1	4.51	20.92
(P+T+I)	TopFun	11	Arteriosclerosis	Cardiovascular System Disease	103	Vascular disease	53	Arteriosclerosis	12	Mid / Long	1.562e-14
(T-2)	GEO up	11	cardiomyopathy DOID-0050700 human GSE9128 sample 781	Cardiovascular System Disease	103	Myocardial disorder	25	Cardiomyopathy	5	Mid / Long	1.079e-29	8.232e-28	4.72	315
(I)	GEO up	11	Cardiac Hypertrophy C1383860 mouse GSE1621 sample 51	Cardiovascular System Disease	103	Myocardial disorder	25	Cardiomyopathy - Cardiac Hypertrophy	1	Mid / Long	0.0003366	0.02824	2.94	23.5
(T-1)	Rare Diseases	11	Infectious myocarditis	Cardiovascular System Disease	103	Myocardial disorder	25	Infectious myocarditis	4	Mid / Long	6.192e-35	1.263e-32	31.82	2506.23
(T-2)	DisGeNET	12	Carotid Atherosclerosis	Cardiovascular System Disease	103	Vascular disease	53	Carotid Atherosclerosis	6	Mid / Long	2.767e-08	0.0002719	3.93	68.41
(P+T+I)	TopFun	13	Atherosclerosis	Cardiovascular System Disease	103	Vascular disease	53	Arteriosclerosis	12	Mid / Long	3.463e-14
(I+P+T)	GWAS Catalog	13	Cervical artery dissection	Cardiovascular System Disease	103	Vascular disease	53	Carotid Atherosclerosis	6	Mid / Long	0.05316	1	5.06	14.85
(I)	DisGeNET	13	Vasospasm, Intracranial	Cardiovascular System Disease	103	Vascular disease	53	Cerebrovascular Disorders - Vasospasm, Intracranial	1	Mid / Long	0.0072	0.6938	15.06	74.3
(T-1)	DisGeNET	13	Shortened QT interval	Cardiovascular System Disease	103	Cardiac channelopathy	6	Short Qt Syndrome	2	Mid / Long	0.0005268	0.07614	56.82	428.9
(I+P+T)	Rare Diseases	14	Encephalopathy-basal ganglia-calcification	Cardiovascular System Disease	103	Vascular disease	53	Thrombosis - Embolism and thrombosis of abdominal aorta	7	Short / Mid / Long	1.051e-28	1.685e-26	4.49	289.31
(I+P+T)	GWAS Catalog	14	Coronary heart disease (SNP X SNP interaction)	Cardiovascular System Disease	103	Cardiovascular Diseases	12	Cardiovascular Diseases	12	Short / Mid / Long	0.05316	1	5.06	14.85
(T-2)	PheWeb	14	Cardiac pacemaker/device in situ	Cardiovascular System Disease	103	Electrical cardiac activity	4	Cardiac pacemaker	1	Short / Mid / Long	0.0471	1	2.89	8.82
(I)	GEO up	14	Acute myocardial infarction DOID-9408 mouse GSE775 sample 1004	Cardiovascular System Disease	103	Myocardial disorder	25	Myocardial infarction (Acute)	1	Mid / Long	0.0005413	0.03028	2.8	21.07
(I+P+T+B)	PheWeb	15	Cardiac defibrillator in situ	Cardiovascular System Disease	103	Electrical cardiac activity	4	Cardiac defibrillator in situ	1	Short / Mid / Long	0.04283	1	2.49	7.83
(I+P+T)	Rare Diseases	15	Infectious myocarditis	Cardiovascular System Disease	103	Myocardial disorder	25	Infectious myocarditis	4	Mid / Long	1.051e-28	1.573e-26	4.49	289.31
(P+T+I+B)	TopFun	16	Arteriosclerosis	Cardiovascular System Disease	103	Vascular disease	53	Arteriosclerosis	12	Mid / Long	5.19e-85
(P+T)	DisGeNET	16	Carotid Atherosclerosis	Cardiovascular System Disease	103	Vascular disease	53	Carotid Atherosclerosis	6	Mid / Long	2.996e-08	7.011e-06	3.61	62.45
(P+T)	PheWeb	16	Embolism and thrombosis of abdominal aorta	Cardiovascular System Disease	103	Vascular disease	53	Thrombosis - Embolism and thrombosis of abdominal aorta	7	Short / Mid / Long	0.08892	1	2.78	6.74
(I+P+T+B)	DisGeNET	16	Myocardial Infarction	Cardiovascular System Disease	103	Myocardial disorder	25	Myocardial infarction	9	Mid / Long	1.541e-56	1.377e-53	2.62	337.06
(I+P+T)	GWAS Catalog	16	Myocardial infarction (early onset)	Cardiovascular System Disease	103	Myocardial disorder	25	Myocardial infarction (early onset)	3	Mid / Long	0.02048	1	3.61	14.05
(T-1)	GEO up	17	atherosclerosis DOID-1936 human GSE43292 sample 508	Cardiovascular System Disease	103	Vascular disease	53	Arteriosclerosis	12	Mid / Long	9.002e-26	3.975e-24	17.96	1035.79
(P+T+I+B)	TopFun	17	Atherosclerosis	Cardiovascular System Disease	103	Vascular disease	53	Arteriosclerosis	12	Mid / Long	9.1e-85
(I+P+T)	OMIM Expanded	17	arrhythmogenic right ventricular dysplasia	Cardiovascular System Disease	103	Myocardial disorder	25	arrhythmogenic right ventricular dysplasia	2	Mid / Long	0.01083	0.1125	1.97	8.91
(B)	TopFun	17	Myocardial Infarction	Cardiovascular System Disease	103	Myocardial disorder	25	Myocardial infarction	9	Mid / Long	1.79e-118
(I)	TopGene	17	Myocardial Infarction	Cardiovascular System Disease	103	Myocardial disorder	25	Myocardial infarction	9	Mid / Long	1.79e-118
(T-1)	TopGene	17	Myocardial Infarction	Cardiovascular System Disease	103	Myocardial disorder	25	Myocardial infarction	9	Mid / Long	1.79e-118
(P+T)	TopGene	17	Myocardial Infarction	Cardiovascular System Disease	103	Myocardial disorder	25	Myocardial infarction	9	Mid / Long	1.79e-118
(P+T+I)	TopGene	17	Myocardial Infarction	Cardiovascular System Disease	103	Myocardial disorder	25	Myocardial infarction	9	Mid / Long	1.79e-118
(P)	TopGene	17	Myocardial Infarction	Cardiovascular System Disease	103	Myocardial disorder	25	Myocardial infarction	9	Mid / Long	1.79e-118
(T-2)	TopGene	17	Myocardial Infarction	Cardiovascular System Disease	103	Myocardial disorder	25	Myocardial infarction	9	Mid / Long	1.79e-118
(T-2)	TopFun	18	Coronary Artery Disease	Cardiovascular System Disease	103	Cardiovascular Diseases	12	Cardiovascular Diseases	12	Short / Mid / Long	7.59e-11
(B)	GEO up	18	cardiomyopathy DOID-0050700 human GSE9128 sample 781	Cardiovascular System Disease	103	Myocardial disorder	25	Cardiomyopathy	5	Mid / Long	3.584e-09	1.432e-07	3.15	61.21
(I)	GWAS Catalog	19	Intracranial, abdominal aortic or thoracic aortic aneurysm (pleiotropy)	Cardiovascular System Disease	103	Vascular disease	53	Aneurysm - Thoracic aortic aneurysm	4	Mid / Long	0.09557	1	10.04	23.57
(I+P+T)	DisGeNET	19	Carotid Atherosclerosis	Cardiovascular System Disease	103	Vascular disease	53	Carotid Atherosclerosis	6	Mid / Long	4.626e-07	0.0001196	3.01	43.93
(B)	GWAS Catalog	19	Thrombosis	Cardiovascular System Disease	103	Vascular disease	53	Thrombosis	7	Short / Mid / Long	0.0001556	0.01175	8.95	78.46
(P)	PheWeb	19	Embolism and thrombosis of abdominal aorta	Cardiovascular System Disease	103	Vascular disease	53	Thrombosis - Embolism and thrombosis of abdominal aorta	7	Short / Mid / Long	0.1096	1	8.65	19.13
(I+P+T+B)	OMIM Expanded	19	long qt syndrome	Cardiovascular System Disease	103	Cardiac channelopathy	6	long qt syndrome	4	Mid / Long	1.645e-07	1.538e-06	2.85	44.5
(T-1)	DisGeNET	19	Short Qt Syndrome	Cardiovascular System Disease	103	Cardiac channelopathy	6	Short Qt Syndrome	2	Mid / Long	0.0006754	0.08297	50.51	368.7
(I+P+T+B)	PheWeb	20	Atherosclerosis	Cardiovascular System Disease	103	Vascular disease	53	Arteriosclerosis	12	Mid / Long	0.04434	1	2.24	6.97
(T-2)	TopFun	20	Cerebrovascular accident	Cardiovascular System Disease	103	Vascular disease	53	Cerebrovascular accident (stroke)	9	Short / Mid / Long	1.19e-10
(I+P+T)	PheWeb	20	Pericarditis	Cardiovascular System Disease	103	Pericardium disease	2	Pericarditis	2	Short / Mid / Long	0.07445	1	2.18	5.67
(I)	Rare Diseases	1	Congenital disorders of glycosylation	Congenital anomalies	48	Liver	3	Congenital disorders of glycosylation	3	Congenital / Genetic	1.542e-10	3.46e-07	6.02	136.1
(I)	GWAS Catalog	1	Forehead morphology	Congenital anomalies	48	Musculoskeletal Abnormalities	16	Forehead morphology	2	Congenital / Genetic	0.009157	1	13.39	62.83
(P)	OMIM Expanded	1	lissencephaly	Congenital anomalies	48	Nervous system disease	2	Lissencephaly	1	Congenital / Genetic	0.002482	0.4641	7.09	42.51
(P)	PheWeb	2	Congenital anomalies of the eye	Congenital anomalies	48	Eye	3	Congenital anomalies of the eye	1	Congenital / Genetic	0.06597	1	14.71	39.98
(I)	OMIM Expanded	2	polydactyly	Congenital anomalies	48	Musculoskeletal Abnormalities	16	polydactyly	1	Congenital / Genetic	0.01299	1	3.59	15.58
(T-2)	PheWeb	2	Congenital anomalies of genital organs	Congenital anomalies	48	Reproductive organ	4	Genital organs	4	Congenital / Genetic	0.0289	1	4.33	15.34
(I)	GEO up	3	Sickle Cell Anemia C0002895 human GSE9877 sample 109	Congenital anomalies	48	Hematopoietic system disease	14	Hemoglobinopathy - Sickle Cell Anemia	1	Congenital / Genetic	4.272e-06	0.001792	3.14	38.81
(T-2)	Rare Diseases	4	Congenital dyserythropoietic anemia	Congenital anomalies	48	Hematopoietic system disease	14	Congenital dyserythropoietic anemia	4	Congenital / Genetic	1.12e-39	6.284e-37	6.66	597.36
(I+P+T+B)	OMIM Expanded	4	thalassemia	Congenital anomalies	48	Hematopoietic system disease	14	congenital hemolytic anemia - thalassemia	5	Congenital / Genetic	3.961e-09	1.852e-07	3.16	61.13
(P)	GWAS Catalog	4	Cleft palate	Congenital anomalies	48	Musculoskeletal Abnormalities	16	Cleft palate	4	Congenital / Genetic	0.03354	1	29.41	99.85
(P)	OMIM Expanded	4	xeroderma pigmentosum	Congenital anomalies	48	Skin disease	2	Xeroderma pigmentosum	1	Congenital / Genetic	0.002944	0.1376	6.76	39.4
(I+P+T)	PheWeb	5	Congenital coagulation defects	Congenital anomalies	48	Hematopoietic system disease	14	Congenital coagulation defects	4	Congenital / Genetic	0.03282	1	3.16	10.81
(P+T)	Rare Diseases	5	Congenital dyserythropoietic anemia	Congenital anomalies	48	Hematopoietic system disease	14	Congenital dyserythropoietic anemia	4	Congenital / Genetic	1.221e-36	5.478e-34	5.76	476.08
(P+T)	PheWeb	5	Congenital anomalies of genital organs	Congenital anomalies	48	Reproductive organ	4	Genital organs	4	Congenital / Genetic	0.04507	1	3.64	11.28
(P)	Rare Diseases	6	Zechi Ceide syndrome	Congenital anomalies	48	Musculoskeletal Abnormalities	16	Zechi Ceide syndrome	1	Congenital / Genetic	1.148e-16	4.292e-14	13.97	512.77
(T-2)	PheWeb	7	Congenital coagulation defects	Congenital anomalies	48	Hematopoietic system disease	14	Congenital coagulation defects	4	Congenital / Genetic	0.05029	1	3.52	10.52
(I+P+T)	Rare Diseases	7	Congenital dyserythropoietic anemia	Congenital anomalies	48	Hematopoietic system disease	14	Congenital dyserythropoietic anemia	4	Congenital / Genetic	3.146e-31	1.009e-28	4.68	328.74
(I)	OMIM Expanded	7	microcephaly	Congenital anomalies	48	Musculoskeletal Abnormalities	16	microcephaly	2	Congenital / Genetic	0.01783	0.4762	3.31	13.33
(I+P+T+B)	PheWeb	8	Congenital coagulation defects	Congenital anomalies	48	Hematopoietic system disease	14	Congenital coagulation defects	4	Congenital / Genetic	0.02633	1	2.8	10.17
(T-2)	OMIM Expanded	9	thalassemia	Congenital anomalies	48	Hematopoietic system disease	14	congenital hemolytic anemia - thalassemia	5	Congenital / Genetic	0.1672	1	1.55	2.76
(B)	OMIM Expanded	10	thalassemia	Congenital anomalies	48	Hematopoietic system disease	14	congenital hemolytic anemia - thalassemia	5	Congenital / Genetic	1.805e-09	3.069e-08	5.68	114.45
(I+P+T)	GWAS Catalog	10	Forehead morphology	Congenital anomalies	48	Musculoskeletal Abnormalities	16	Forehead morphology	2	Congenital / Genetic	0.02884	1	4.22	14.95
(P+T)	PheWeb	11	Congenital coagulation defects	Congenital anomalies	48	Hematopoietic system disease	14	Congenital coagulation defects	4	Congenital / Genetic	0.0767	1	2.96	7.59
(P+T)	OMIM Expanded	12	thalassemia	Congenital anomalies	48	Hematopoietic system disease	14	congenital hemolytic anemia - thalassemia	5	Congenital / Genetic	0.04226	0.6078	1.86	5.87
(I+P+T)	OMIM Expanded	12	thalassemia	Congenital anomalies	48	Hematopoietic system disease	14	congenital hemolytic anemia - thalassemia	5	Congenital / Genetic	0.006569	0.1024	2.08	10.47
(P)	OMIM Expanded	12	arthrogryposis	Congenital anomalies	48	Musculoskeletal Abnormalities	16	arthrogryposis	2	Congenital / Genetic	0.01903	0.2966	5.32	21.06
(P+T)	GWAS Catalog	12	Cleft lip with or without cleft palate	Congenital anomalies	48	Musculoskeletal Abnormalities	16	Cleft palate	4	Congenital / Genetic	0.007072	1	3.94	19.53
(P)	DisGeNET	12	Cleft palate and bilateral cleft lip	Congenital anomalies	48	Musculoskeletal Abnormalities	16	Cleft palate and bilateral cleft lip	4	Congenital / Genetic	0.001251	0.053	36.76	245.72
(I)	DisGeNET	12	Congenital hypoplasia of femur	Congenital anomalies	48	Musculoskeletal Abnormalities	16	Congenital hypoplasia of femur	1	Congenital / Genetic	0.001778	0.4724	12.05	76.29
(T-2)	PheWeb	12	Congenital anomalies of limbs	Congenital anomalies	48	Musculoskeletal Abnormalities	16	limbs	2	Congenital / Genetic	0.05872	1	3.31	9.39
(I+P+T+B)	PheWeb	12	Congenital anomalies of genital organs	Congenital anomalies	48	Reproductive organ	4	Genital organs	4	Congenital / Genetic	0.04861	1	2.75	8.33
(B)	Rare Diseases	13	Leukomalacia	Congenital anomalies	48	Nervous system disease	2	Brain-Leukomalacia	1	Congenital / Genetic	7.831e-11	1.352e-08	4.03	93.71
(B)	GWAS Catalog	13	Parental lifespan	Congenital anomalies	48	Lifespan	1	Parental lifespan	1	Congenital / Genetic	0.0009463	0.04214	13.42	93.46
(I+P+T+B)	Rare Diseases	14	Congenital dyserythropoietic anemia	Congenital anomalies	48	Hematopoietic system disease	14	Congenital dyserythropoietic anemia	4	Congenital / Genetic	2.233e-28	3.58e-26	3.72	236.55
(I)	Rare Diseases	15	Conotruncal heart malformations	Congenital anomalies	48	Cardiovascular System Disorder	1	Conotruncal heart malformations	1	Congenital / Genetic	6.749e-06	0.00101	4.22	50.21
(T-2)	Rare Diseases	15	Congenital porphyria	Congenital anomalies	48	Liver	3	Congenital porphyria	3	Congenital / Genetic	7.649e-32	1.144e-29	5.91	423.44
(P+T)	PheWeb	15	Congenital anomalies of limbs	Congenital anomalies	48	Musculoskeletal Abnormalities	16	limbs	2	Congenital / Genetic	0.08892	1	2.78	6.74
(I+P+T)	PheWeb	15	Congenital anomalies of genital organs	Congenital anomalies	48	Reproductive organ	4	Genital organs	4	Congenital / Genetic	0.07756	1	2.92	7.46
(T-1)	Rare Diseases	16	X-linked adrenal hypoplasia congenita	Congenital anomalies	48	Adrenal Gland	1	X-linked adrenal hypoplasia congenita	1	Congenital / Genetic	7.49e-30	1.05e-27	28.41	1905.23
(P+T)	Rare Diseases	17	Congenital porphyria	Congenital anomalies	48	Liver	3	Congenital porphyria	3	Congenital / Genetic	3.353e-30	4.426e-28	5.21	353.25
(I)	DisGeNET	18	Adducted thumb	Congenital anomalies	48	Musculoskeletal Abnormalities	16	Adducted thumb	1	Congenital / Genetic	0.0002291	0.1609	8.86	74.25
(I)	OMIM Expanded	18	arthrogryposis	Congenital anomalies	48	Musculoskeletal Abnormalities	16	arthrogryposis	2	Congenital / Genetic	0.04939	0.4861	2.9	8.73
(P)	DisGeNET	19	Congenital euryblepharon	Congenital anomalies	48	Eye	3	Congenital euryblepharon	1	Congenital / Genetic	0.001993	0.07046	29.41	182.89
(P)	DisGeNET	20	Kabuki syndrome eyelids	Congenital anomalies	48	Eye	3	Kabuki syndrome eyelids	1	Congenital / Genetic	0.001993	0.07021	29.41	182.89
(I+P+T)	GWAS Catalog	20	Cleft lip with or without cleft palate	Congenital anomalies	48	Musculoskeletal Abnormalities	16	Cleft palate	4	Congenital / Genetic	0.01744	1	3.16	12.81
(I+P+T)	OMIM Expanded	20	microcephaly	Congenital anomalies	48	Musculoskeletal Abnormalities	16	microcephaly	2	Congenital / Genetic	0.01189	0.1112	1.95	8.63
(P)	Rare Diseases	20	Rothmund Thomson syndrome	Congenital anomalies	48	Skin disease	2	Rothmund Thomson syndrome	1	Congenital / Genetic	3.278e-14	3.678e-12	12.5	388.11
(I+P+T)	Rare Diseases	20	Tetraploidy	Congenital anomalies	48	Tetraploidy	1	Tetraploidy	1	Congenital / Genetic	2.874e-26	3.225e-24	4.3	252.95
(I+P+T)	PheWeb	11	Eustachian tube disorders	Ear disease	1	Ear disease	1	Eustachian tube disorders	1	Short	0.06326	1	3.16	8.73
(B)	OMIM Expanded	1	macular degeneration	Eye Disease	42	Retinal degeneration	15	macular degeneration	7	Mid / Long	5.074e-13	9.489e-11	6.5	184
(I+P+T+B)	OMIM Expanded	2	macular degeneration	Eye Disease	42	Retinal degeneration	15	macular degeneration	7	Mid / Long	5.152e-11	4.817e-09	3.3	78.13
(I)	PheWeb	2	Peripheral retinal degenerations	Eye Disease	42	Retinal degeneration	15	Peripheral retinal degenerations	2	Mid / Long	0.00483	1	8.61	45.89
(I)	DisGeNET	2	Shallow anterior chamber of eye	Eye Disease	42	Eye Disease	4	Shallow anterior chamber of eye	1	Congenital / Genetic	0.003943	0.625	20.08	111.16
(I)	PheWeb	3	Other disorders of eyelids	Eye Disease	42	Eyelid disease	2	Other disorders of Eyelids	1	Short / Mid / Long	0.007954	1	7.23	34.95
(P+T)	GWAS Catalog	3	Age-related macular degeneration (choroidal neovascularisation)	Eye Disease	42	Retinal degeneration	15	macular degeneration (Age-related)	6	Mid / Long	0.007334	0.98	6.76	33.23
(P)	Rare Diseases	4	Rhizomelic chondrodysplasia punctata type 2	Eye Disease	42	Lens disease	5	Rhizomelic chondrodysplasia punctata type 2	1	Congenital / Genetic	6.559e-22	3.68e-19	16.91	824.89
(B)	PheWeb	4	Open-angle glaucoma	Eye Disease	42	Optic nerve	5	Occipital horn syndrome	4	Congenital / Genetic	0.01113	1	6.2	27.87
(I+P+T)	OMIM Expanded	4	macular degeneration	Eye Disease	42	Retinal degeneration	15	macular degeneration	7	Mid / Long	0.00304	0.1421	2.13	12.35
(I+P+T)	GWAS Catalog	4	Age-related macular degeneration (choroidal neovascularisation)	Eye Disease	42	Retinal degeneration	15	macular degeneration (Age-related)	6	Mid / Long	0.01354	1	5.42	23.32
(I+P+T)	PheWeb	4	Peripheral retinal degenerations	Eye Disease	42	Retinal degeneration	15	Peripheral retinal degenerations	2	Mid / Long	0.02143	1	3.01	11.57
(P)	Rare Diseases	5	Occipital horn syndrome	Eye Disease	42	Optic nerve	5	Occipital horn syndrome	1	Congenital / Genetic	1.148e-16	5.15e-14	13.97	512.77
(P)	PheWeb	5	Retinal detachments and defects	Eye Disease	42	Retinal detachments	5	Retinal detachments and defects	1	Mid / Long	0.08491	1	11.31	27.9
(B)	PheWeb	5	Retinal vascular changes and abnomalities	Eye Disease	42	Retinal vasculopathy	2	Retinal vascular changes and abnomalitie	1	Mid / Long	0.006891	1	5.11	25.45
(B)	Rare Diseases	6	Eales disease	Eye Disease	42	Retinal vasculopathy	2	Eales disease	1	Mid / Long	1.593e-11	5.959e-09	4.16	103.45
(P)	Rare Diseases	8	Rhizomelic chondrodysplasia punctata type 1	Eye Disease	42	Lens disease	5	Rhizomelic chondrodysplasia punctata type 1	1	Congenital / Genetic	2.006e-15	5.627e-13	13.24	447.92
(I+P+T+B)	GWAS Catalog	8	Age-related macular degeneration (choroidal neovascularisation)	Eye Disease	42	Retinal degeneration	15	macular degeneration (Age-related)	6	Mid / Long	0.004111	0.2381	5.12	28.11
(T-2)	PheWeb	9	Keratitis	Eye Disease	42	Eye Disease	4	Keratitis	2	Short	0.04154	1	3	9.55
(I)	OMIM Expanded	9	macular degeneration	Eye Disease	42	Retinal degeneration	15	macular degeneration	7	Mid / Long	0.02107	0.4377	3.17	12.24
(T-1)	OMIM Expanded	9	macular degeneration	Eye Disease	42	Retinal degeneration	15	macular degeneration	7	Mid / Long	0.3429	1	2.39	2.56
(P)	GWAS Catalog	10	Optic nerve measurement (rim area)	Eye Disease	42	Optic nerve	5	Occipital horn syndrome	4	Congenital / Genetic	0.04012	1	24.51	78.82
(T-2)	PheWeb	10	Separation of retinal layers	Eye Disease	42	Retinal detachments	5	Separation of retinal layers	2	Mid / Long	0.05872	1	3.31	9.39
(P+T)	OMIM Expanded	11	macular degeneration	Eye Disease	42	Retinal degeneration	15	macular degeneration	7	Mid / Long	0.03785	0.6435	1.83	5.98
(T-2)	PheWeb	13	Allergic conjunctivitis	Eye Disease	42	Conjunctivitis	3	Allergic conjunctivitis	3	Short	0.0471	1	2.89	8.82
(B)	PheWeb	13	Cataract	Eye Disease	42	Lens disease	5	Cataract	3	Mid / Long	0.01695	1	3.98	16.22
(T-1)	PheWeb	13	Open-angle glaucoma	Eye Disease	42	Optic nerve	5	Occipital horn syndrome	4	Congenital / Genetic	0.05573	1	17.48	50.48
(I+P+T+B)	PheWeb	13	Open-angle glaucoma	Eye Disease	42	Optic nerve	5	Occipital horn syndrome	4	Congenital / Genetic	0.04861	1	2.75	8.33
(I+P+T+B)	GWAS Catalog	13	Age-related macular degeneration (geographic atrophy)	Eye Disease	42	Retinal degeneration	15	macular degeneration (Age-related)	6	Mid / Long	0.002689	0.1796	4.48	26.49
(P+T)	PheWeb	13	Separation of retinal layers	Eye Disease	42	Retinal detachments	5	Separation of retinal layers	2	Mid / Long	0.08892	1	2.78	6.74
(I+P+T+B)	PheWeb	14	Senile cataract	Eye Disease	42	Lens disease	5	Cataract (Senile)	3	Mid / Long	0.02585	1	2.17	7.93
(B)	PheWeb	15	Lagophthalmos	Eye Disease	42	Eyelid disease	2	Lagophthalmos	1	Short / Mid / Long	0.02767	1	4.47	16.05
(P)	GEO up	15	Treacher Collins syndrome DOID-2908 mouse GSE10167 sample 480	Eye Disease	42	Neuro-ophthalmological disease	1	Treacher Collins syndrome	1	Congenital / Genetic	6.064e-17	1.957e-15	11.97	446.97
(T-2)	OMIM Expanded	15	macular degeneration	Eye Disease	42	Retinal degeneration	15	macular degeneration	7	Mid / Long	0.2429	1	1.38	1.96
(T-1)	GWAS Catalog	15	Age-related macular degeneration (choroidal neovascularisatio	Eye Disease	42	Retinal degeneration	15	macular degeneration (Age-related)	6	Mid / Long	0.0304	1	32.47	113.42
(I+P+T)	PheWeb	16	Allergic conjunctivitis	Eye Disease	42	Conjunctivitis	3	Allergic conjunctivitis	3	Short	0.05003	1	2.43	7.29
(P)	Rare Diseases	17	Myopathy mitochondrial cataract	Eye Disease	42	Lens disease	5	Cataract (Myopathy mitochondrial)	3	Mid / Long	3.278e-14	4.327e-12	12.5	388.11
(P+T)	GWAS Catalog	17	Age-related macular degeneration (geographic atrophy)	Eye Disease	42	Retinal degeneration	15	macular degeneration (Age-related)	6	Mid / Long	0.02179	1	4.73	18.11
(B)	OMIM Expanded	17	vitreoretinopathy	Eye Disease	42	Retinal detachments	5	Vitreoretinopathy	2	Mid / Long	8.712e-09	7.758e-08	5.5	102.04
(P+T)	PheWeb	18	Keratitis	Eye Disease	42	Eye Disease	4	Keratitis	2	Short	0.07024	1	2.52	6.7
(I+P+T+B)	OMIM Expanded	18	vitreoretinopathy	Eye Disease	42	Retinal detachments	5	Vitreoretinopathy	2	Mid / Long	1.637e-07	1.611e-06	2.91	45.51
(T-1)	PheWeb	19	Visual field defects	Eye Disease	42	Eye Disease	4	Visual field defect	1	Short / Mid / Long	0.07225	1	13.37	35.13
(P+T)	PheWeb	20	Allergic conjunctivitis	Eye Disease	42	Conjunctivitis	3	Allergic conjunctivitis	3	Short	0.07903	1	2.43	6.16
(P+T)	PheWeb	3	Abscess or ulceration of vulva	Female reproductive system disease	7	Vulva	3	Abscess or ulceration of vulva	3	Mid / Long	0.02857	1	4.3	15.29
(T-2)	PheWeb	5	Dysmenorrhea	Female reproductive system disease	7	Menstruation disorder	4	Dysmenorrhea pain	3	Short / Mid / Long	0.01999	1	3.13	12.23
(I+P+T)	PheWeb	7	Abscess or ulceration of vulva	Female reproductive system disease	7	Vulva	3	Abscess or ulceration of vulva	3	Mid / Long	0.05032	1	3.45	10.31
(P+T)	PheWeb	8	Dysmenorrhea	Female reproductive system disease	7	Menstruation disorder	4	Dysmenorrhea pain	3	Short / Mid / Long	0.03856	1	2.63	8.56
(T-1)	PheWeb	12	Abscess or ulceration of vulva	Female reproductive system disease	7	Vulva	3	Abscess or ulceration of vulva	3	Mid / Long	0.04736	1	20.66	63.02
(I)	PheWeb	14	Disorders of menstruation and other abnormal bleeding from female genital tract	Female reproductive system disease	7	Menstruation disorder	4	Menstruation disorder	1	Short / Mid / Long	0.0216	1	5.02	19.25
(T-1)	GWAS Catalog	18	Dysmenorrheic pain severity	Female reproductive system disease	7	Menstruation disorder	4	Dysmenorrheic pain severity	3	Short / Mid / Long	0.0304	1	32.47	113.42
(B)	GEO up	1	Crohn's disease DOID-8778 human GSE6731 sample 758	Gastrointestinal System Disease	38	Inflammatory Bowel Diseases	23	Crohn's disease	1	Short / Mid / Long	1.204e-15	1.01e-12	3.82	131.36
(B)	PheWeb	3	Barrett's esophagus	Gastrointestinal System Disease	38	Barrett's esophagus	2	Barrett's esophagus	2	Mid / Long	0.001361	0.7903	5.84	38.51
(B)	Rare Diseases	3	Collagenous colitis	Gastrointestinal System Disease	38	Collagenous colitis	1	Collagenous colitis	1	Mid / Long	1.593e-11	1.192e-08	4.16	103.45
(I+P+T+B)	PheWeb	4	Barrett's esophagus	Gastrointestinal System Disease	38	Barrett's esophagus	2	Barrett's esophagus	2	Mid / Long	0.01047	1	2.72	12.42
(B)	Rare Diseases	4	Cysticercosis	Gastrointestinal System Disease	38	Cyst	3	Cysticercosis	2	Short / Mid / Long	1.593e-11	8.939e-09	4.16	103.45
(T-2)	GWAS Catalog	4	Paneth cell defects in Crohn's disease	Gastrointestinal System Disease	38	Inflammatory Bowel Diseases	23	Paneth cell defects in Crohn's disease	3	Mid / Long	0.009955	0.8234	6.25	28.83
(P)	DisGeNET	4	Serrated polyp	Gastrointestinal System Disease	38	Serrated polyp	1	Serrated polyp	1	Mid / Long	0.0006763	0.0329	49.02	357.79
(P+T)	GWAS Catalog	5	Paneth cell defects in Crohn's disease	Gastrointestinal System Disease	38	Inflammatory Bowel Diseases	23	Paneth cell defects in Crohn's disease	3	Mid / Long	0.016	1	5.26	21.74
(I)	PheWeb	5	Periapical abscess	Gastrointestinal System Disease	38	Mouth disease	5	Periapical Abscess	1	Mid / Long	0.02192	1	8.61	32.88
(B)	Rare Diseases	7	Lymphocytic colitis	Gastrointestinal System Disease	38	Diarrhea	1	Lymphocytic colitis (watery diarrhea)	1	Short	1.593e-11	5.108e-09	4.16	103.45
(P)	PheWeb	9	Acute periodontitis	Gastrointestinal System Disease	38	Acute periodontitis	1	Acute periodontitis	1	Short / Mid / Long	0.09113	1	10.5	25.16
(T-2)	GEO up	10	ulcerative colitis DOID-8577 human GSE9452 sample 924	Gastrointestinal System Disease	38	Inflammatory Bowel Diseases	23	Ulcerative colitis	12	Short / Mid / Long	6.669e-33	7.993e-31	4.47	331.14
(I+P+T+B)	GEO up	10	ulcerative colitis DOID-8577 human GSE9452 sample 924	Gastrointestinal System Disease	38	Inflammatory Bowel Diseases	23	Ulcerative colitis	12	Short / Mid / Long	9.999e-35	9.322e-33	3.17	248.51
(I+P+T)	GWAS Catalog	11	Paneth cell defects in Crohn's disease	Gastrointestinal System Disease	38	Inflammatory Bowel Diseases	23	Paneth cell defects in Crohn's disease	3	Mid / Long	0.02884	1	4.22	14.95
(I+P+T+B)	GEO up	11	ulcerative colitis DOID-8577 human GSE9452 sample 454	Gastrointestinal System Disease	38	Inflammatory Bowel Diseases	23	Ulcerative colitis	12	Short / Mid / Long	1.591e-30	1.214e-28	2.86	196.33
(P+T)	GEO up	11	ulcerative colitis DOID-8577 human GSE9452 sample 924	Gastrointestinal System Disease	38	Inflammatory Bowel Diseases	23	Ulcerative colitis	12	Short / Mid / Long	1.057e-34	8.063e-33	4.19	328.14
(I+P+T)	GEO up	11	ulcerative colitis DOID-8577 human GSE9452 sample 924	Gastrointestinal System Disease	38	Inflammatory Bowel Diseases	23	Ulcerative colitis	12	Short / Mid / Long	9.368e-30	8.733e-28	3.5	234.22
(P)	PheWeb	12	Cyst and pseudocyst of pancreas	Gastrointestinal System Disease	38	Cyst	3	Cyst and pseudocyst of pancreas	1	Short / Mid / Long	0.09732	1	9.8	22.84
(P+T)	GEO up	12	ulcerative colitis DOID-8577 human GSE9452 sample 454	Gastrointestinal System Disease	38	Inflammatory Bowel Diseases	23	Ulcerative colitis	12	Short / Mid / Long	5.264e-36	4.907e-34	4.01	325.75
(I+P+T+B)	GEO up	12	ulcerative colitis DOID-8577 human GSE9452 sample 923	Gastrointestinal System Disease	38	Inflammatory Bowel Diseases	23	Ulcerative colitis	12	Short / Mid / Long	2.032e-30	1.421e-28	2.83	193.44
(B)	TopFun	13	Inflammatory Bowel Diseases	Gastrointestinal System Disease	38	Inflammatory Bowel Diseases	23	Inflammatory Bowel Diseases (IBD)	7	Short / Mid / Long	4.259e-121
(I)	TopGene	13	Inflammatory Bowel Diseases	Gastrointestinal System Disease	38	Inflammatory Bowel Diseases	23	Inflammatory Bowel Diseases (IBD)	7	Short / Mid / Long	4.259e-121
(T-1)	TopGene	13	Inflammatory Bowel Diseases	Gastrointestinal System Disease	38	Inflammatory Bowel Diseases	23	Inflammatory Bowel Diseases (IBD)	7	Short / Mid / Long	4.259e-121
(P+T)	TopGene	13	Inflammatory Bowel Diseases	Gastrointestinal System Disease	38	Inflammatory Bowel Diseases	23	Inflammatory Bowel Diseases (IBD)	7	Short / Mid / Long	4.259e-121
(P+T+I)	TopGene	13	Inflammatory Bowel Diseases	Gastrointestinal System Disease	38	Inflammatory Bowel Diseases	23	Inflammatory Bowel Diseases (IBD)	7	Short / Mid / Long	4.259e-121
(P)	TopGene	13	Inflammatory Bowel Diseases	Gastrointestinal System Disease	38	Inflammatory Bowel Diseases	23	Inflammatory Bowel Diseases (IBD)	7	Short / Mid / Long	4.259e-121
(T-2)	TopGene	13	Inflammatory Bowel Diseases	Gastrointestinal System Disease	38	Inflammatory Bowel Diseases	23	Inflammatory Bowel Diseases (IBD)	7	Short / Mid / Long	4.259e-121
(B)	Rare Diseases	14	Ogilvie syndrome	Gastrointestinal System Disease	38	Dilatation	1	Ogilvie syndrome	1	Short / Mid / Long	7.831e-11	1.255e-08	4.03	93.71
(I+P+T)	GEO up	14	ulcerative colitis DOID-8577 human GSE9452 sample 454	Gastrointestinal System Disease	38	Inflammatory Bowel Diseases	23	Ulcerative colitis	12	Short / Mid / Long	8.475e-28	6.464e-26	3.22	200.48
(T-2)	GEO up	14	ulcerative colitis DOID-8577 human GSE9452 sample 923	Gastrointestinal System Disease	38	Inflammatory Bowel Diseases	23	Ulcerative colitis	12	Short / Mid / Long	9.45e-32	9.911e-30	4.07	290.81
(P+T)	GEO up	14	ulcerative colitis DOID-8577 human GSE9452 sample 923	Gastrointestinal System Disease	38	Inflammatory Bowel Diseases	23	Ulcerative colitis	12	Short / Mid / Long	1.225e-35	1.028e-33	3.94	316.99
(T-2)	GEO up	15	ulcerative colitis DOID-8577 human GSE9452 sample 454	Gastrointestinal System Disease	38	Inflammatory Bowel Diseases	23	Ulcerative colitis	12	Short / Mid / Long	3.172e-31	2.661e-29	4.09	287.12
(I+P+T+B)	Rare Diseases	16	Cysticercosis	Gastrointestinal System Disease	38	Cyst	3	Cysticercosis	2	Short / Mid / Long	1.294e-27	1.815e-25	3.67	227.25
(I+P+T)	GEO up	16	ulcerative colitis DOID-8577 human GSE9452 sample 923	Gastrointestinal System Disease	38	Inflammatory Bowel Diseases	23	Ulcerative colitis	12	Short / Mid / Long	2.113e-27	1.477e-25	3.16	194.25
(P)	PheWeb	18	Disorders of tooth development	Gastrointestinal System Disease	38	Mouth disease	5	Disorders of tooth development	1	Congenital / Genetic	0.1096	1	8.65	19.13
(I+P+T+B)	GEO up	19	Dental cavity, complex C0399396 human GSE1629 sample 175	Gastrointestinal System Disease	38	Mouth disease	5	Dental cavity	2	Mid / Long	1.232e-20	4.924e-19	3.24	148.49
(B)	Rare Diseases	19	Geographic tongue	Gastrointestinal System Disease	38	Mouth disease	5	Geographic tongue	1	Mid / Long	3.7e-10	4.37e-08	3.89	84.54
(B)	GEO up	20	Dental cavity, complex C0399396 human GSE1629 sample 175	Gastrointestinal System Disease	38	Mouth disease	5	Dental cavity	2	Mid / Long	2.749e-08	5.625e-07	3.51	61.06
(I)	OMIM Expanded	4	alopecia	Hair disease	1	Alopecia	1	Alopecia	1	Mid / Long	0.01563	0.7305	3.42	14.23
(T-2)	DisGeNET	1	Anemia, hereditary spherocytic hemolytic	Hematopoietic system disease	19	Hemoglobin / Anemia	8	Anemia, hereditary spherocytic hemolytic	3	Congenital / Genetic	0.0001104	0.01619	12.51	113.96
(T-2)	OMIM Expanded	2	Anemia	Hematopoietic system disease	19	Hemoglobin / Anemia	8	Anemia	2	Short / Mid / Long	0.03965	1	2.19	7.07
(P+T)	DisGeNET	5	Anemia, hereditary spherocytic hemolytic	Hematopoietic system disease	19	Hemoglobin / Anemia	8	Anemia, hereditary spherocytic hemolytic	3	Congenital / Genetic	0.0002175	0.009214	10.52	88.68
(I+P+T)	DisGeNET	5	Anemia, hereditary spherocytic hemolytic	Hematopoietic system disease	19	Hemoglobin / Anemia	8	Anemia, hereditary spherocytic hemolytic	3	Congenital / Genetic	0.0005124	0.02445	8.43	63.89
(I)	OMIM Expanded	5	thrombophilia	Hematopoietic system disease	19	Blood platelet disease	5	Thrombophilia	5	Short	0.01563	0.5844	3.42	14.23
(P+T)	OMIM Expanded	6	Anemia	Hematopoietic system disease	19	Hemoglobin / Anemia	8	Anemia	2	Short / Mid / Long	0.03484	0.724	2.1	7.06
(I)	GEO up	7	Essential Thrombocytemia C0040028 human GSE2006 sample 434	Hematopoietic system disease	19	Thrombocytemia	1	Essential Thrombocytemia	1	Short / Mid / Long	3.259e-05	0.005469	2.83	29.22
(T-1)	OMIM Expanded	7	thrombophilia	Hematopoietic system disease	19	Blood platelet disease	5	Thrombophilia	5	Short	0.3222	1	2.58	2.93
(B)	OMIM Expanded	11	thrombophilia	Hematopoietic system disease	19	Blood platelet disease	5	Thrombophilia	5	Short	3.259e-09	5.079e-08	5.49	107.31
(I+P+T+B)	OMIM Expanded	14	thrombophilia	Hematopoietic system disease	19	Blood platelet disease	5	Thrombophilia	5	Short	4.171e-08	5.571e-07	2.95	50.13
(I+P+T)	OMIM Expanded	15	thrombophilia	Hematopoietic system disease	19	Blood platelet disease	5	Thrombophilia	5	Short	0.008922	0.1112	2.01	9.5
(T-2)	DisGeNET	17	Elliptocytosis, Hereditary	Hematopoietic system disease	19	Elliptocytosis	2	Elliptocytosis, Hereditary	1	Congenital / Genetic	0.0001683	0.02042	6.62	57.54
(I)	Rare Diseases	17	Familial erythrocytosis 1	Hematopoietic system disease	19	Elliptocytosis	2	Familial erythrocytosis 1	1	Congenital / Genetic	6.749e-06	0.0008909	4.22	50.21
(P+T)	OMIM Expanded	18	fetal hemoglobin quantitative trait locus	Hematopoietic system disease	19	Hemoglobin / Anemia	8	Fetal hemoglobin quantitative trait locus	2	Congenital / Genetic	0.07935	0.7419	1.71	4.33
(T-2)	Rare Diseases	18	Hereditary spherocytosis	Hematopoietic system disease	19	Spherocytosis	1	Hereditary spherocytosis	1	Congenital / Genetic	6.559e-31	8.177e-29	5.82	404.22
(P+T)	DisGeNET	18	POEMS Syndrome	Hematopoietic system disease	19	POEMS Syndrome	2	POEMS Syndrome	2	Mid / Long	0.0001238	0.005937	6.76	60.82
(T-2)	OMIM Expanded	19	fetal hemoglobin quantitative trait locus	Hematopoietic system disease	19	Hemoglobin / Anemia	8	Fetal hemoglobin quantitative trait locus	2	Congenital / Genetic	0.2811	1	1.36	1.72
(P+T)	OMIM Expanded	20	hemochromatosis	Hematopoietic system disease	19	Hemoglobin / Anemia	8	Hemochromatosis	1	Short / Mid	0.07935	0.6745	1.71	4.33
(I+P+T)	DisGeNET	20	POEMS Syndrome	Hematopoietic system disease	19	POEMS Syndrome	2	POEMS Syndrome	2	Mid / Long	0.0004165	0.02088	5.42	42.2
(I)	PheWeb	10	Abdominal hernia	Hernia	2	Hernia	2	Hernia	2	Mid / Long	0.03901	1	6.34	20.57
(I)	PheWeb	16	Incisional hernia	Hernia	2	Hernia	2	Hernia	2	Mid / Long	0.05102	1	5.48	16.3
(T-1)	PheWeb	4	Allergies, other	Hypersensitivity reaction disease	5	Allergy	5	Allergies	1	Mid / Long	0.003807	1	21.65	120.58
(P)	OMIM Expanded	14	Atopy	Hypersensitivity reaction disease	5	Allergy	5	Atopy	4	Short / Mid / Long	0.01903	0.2542	5.32	21.06
(P+T)	OMIM Expanded	16	Atopy	Hypersensitivity reaction disease	5	Allergy	5	Atopy	4	Short / Mid / Long	0.07935	0.8243	1.71	4.33
(T-2)	OMIM Expanded	17	Atopy	Hypersensitivity reaction disease	5	Allergy	5	Atopy	4	Short / Mid / Long	0.2811	1	1.36	1.72
(I)	OMIM Expanded	20	Atopy	Hypersensitivity reaction disease	5	Allergy	5	Atopy	4	Short / Mid / Long	0.04939	0.4398	2.9	8.73
(T-1)	DisGeNET	1	Histiocytic Necrotizing Lymphadenitis	Immune System Disorder	86	Lymphadenitis	1	Histiocytic Necrotizing Lymphadenitis	1	Short	1.63e-06	0.0008902	113.64	1514.39
(B)	OMIM Expanded	2	systemic lupus erythematosus	Immune System Disorder	86	Autoimmune disease	68	lupus erythematosus, syatematic	29	Mid / Long	4.813e-12	4.5e-10	5.88	153.24
(T-1)	GEO up	3	discoid lupus erythematosus UMLS CUI-C0024138 human GSE52471 sample 689	Immune System Disorder	86	Autoimmune disease	68	lupus erythematosus (discoid)	6	Mid / Long	7.585e-45	1.591e-42	24.62	2501.27
(P+T)	TopFun	3	Lupus Erythematosus, Systemic	Immune System Disorder	86	Autoimmune disease	68	lupus erythematosus, syatematic	29	Mid / Long	8.103e-23
(B)	GWAS Catalog	3	Neuromyelitis optica	Immune System Disorder	86	Autoimmune disease	68	Neuromyelitis optica	4	Mid / Long	6.11e-05	0.006633	15.34	148.85
(T-2)	DisGeNET	3	C1q DEFICIENCY	Immune System Disorder	86	Immunodeficiency	10	C1q Deficiency	8	Mid / Long / Genetic	0.0001104	0.01573	12.51	113.96
(B)	GWAS Catalog	4	Neuromyelitis optica (AQP4-IgG-positive)	Immune System Disorder	86	Autoimmune disease	68	Neuromyelitis optica	4	Mid / Long	6.11e-05	0.006243	15.34	148.85
(P)	GEO up	4	Simian Acquired Immune Deficiency Syndrome C0080151 human GSE4785 sample 92	Immune System Disorder	86	Immunodeficiency	10	Simian Acquired Immune Deficiency Syndrome	1	Mid / Long	2.772e-23	7.752e-21	12.08	627.5
(I+P+T+B)	GEO up	5	systemic lupus erythematosus DOID-9074 human GSE10325 sample 691	Immune System Disorder	86	Autoimmune disease	68	lupus erythematosus, syatematic	29	Mid / Long	2.666e-46	4.474e-44	3.47	363.74
(T-1)	GEO up	5	systemic lupus erythematosus DOID-9074 human GSE61635 sample 816	Immune System Disorder	86	Autoimmune disease	68	lupus erythematosus, syatematic	29	Mid / Long	7.249e-36	1.216e-33	23.77	1923.05
(P+T+I+B)	TopFun	5	Lupus Erythematosus, Systemic	Immune System Disorder	86	Autoimmune disease	68	lupus erythematosus, syatematic	29	Mid / Long	1.46e-90
(I+P+T+B)	GEO up	6	systemic lupus erythematosus (SLE) DOID-9074 human GSE36700 sample 512	Immune System Disorder	86	Autoimmune disease	68	lupus erythematosus, syatematic	29	Mid / Long	1.452e-40	1.522e-38	3.63	332.78
(I+P+T)	GEO up	6	systemic lupus erythematosus DOID-9074 human GSE10325 sample 691	Immune System Disorder	86	Autoimmune disease	68	lupus erythematosus, syatematic	29	Mid / Long	7.756e-43	1.085e-40	3.99	386.85
(P+T+I)	TopFun	6	Lupus Erythematosus, Systemic	Immune System Disorder	86	Autoimmune disease	68	lupus erythematosus, syatematic	29	Mid / Long	2.144e-16
(I+P+T+B)	OMIM Expanded	7	systemic lupus erythematosus	Immune System Disorder	86	Autoimmune disease	68	lupus erythematosus, syatematic	29	Mid / Long	4.878e-09	1.824e-07	2.9	55.48
(P+T)	GEO up	7	systemic lupus erythematosus (SLE) DOID-9074 human GSE36700 sample 512	Immune System Disorder	86	Autoimmune disease	68	lupus erythematosus, syatematic	29	Mid / Long	4.131e-43	4.332e-41	5.05	492.98
(I+P+T)	GEO up	7	systemic lupus erythematosus (SLE) DOID-9074 human GSE36700 sample 512	Immune System Disorder	86	Autoimmune disease	68	lupus erythematosus, syatematic	29	Mid / Long	1.328e-39	1.393e-37	4.3	384.87
(T-2)	TopFun	7	Lupus Erythematosus, Systemic	Immune System Disorder	86	Autoimmune disease	68	lupus erythematosus, syatematic	29	Mid / Long	2.07e-13
(T-1)	GEO up	7	psoriasis DOID-8893 human GSE52471 sample 690	Immune System Disorder	86	Autoimmune disease of Skin	68	Psoriasis	5	Mid / Long	1.035e-29	1.085e-27	21	1401.7
(B)	TopFun	7	Autoimmune Diseases	Immune System Disorder	86	Autoimmune disease	68	Autoimmune diseases	10	Mid / Long	4.008e-126
(I)	TopGene	7	Autoimmune Diseases	Immune System Disorder	86	Autoimmune disease	68	Autoimmune diseases	10	Mid / Long	4.008e-126
(T-1)	TopGene	7	Autoimmune Diseases	Immune System Disorder	86	Autoimmune disease	68	Autoimmune diseases	10	Mid / Long	4.008e-126
(P+T)	TopGene	7	Autoimmune Diseases	Immune System Disorder	86	Autoimmune disease	68	Autoimmune diseases	10	Mid / Long	4.008e-126
(P+T+I)	TopGene	7	Autoimmune Diseases	Immune System Disorder	86	Autoimmune disease	68	Autoimmune diseases	10	Mid / Long	4.008e-126
(P)	TopGene	7	Autoimmune Diseases	Immune System Disorder	86	Autoimmune disease	68	Autoimmune diseases	10	Mid / Long	4.008e-126
(T-2)	TopGene	7	Autoimmune Diseases	Immune System Disorder	86	Autoimmune disease	68	Autoimmune diseases	10	Mid / Long	4.008e-126
(B)	OMIM Expanded	7	c2deficiency	Immune System Disorder	86	Immunodeficiency	10	C1q Deficiency	8	Mid / Long / Genetic	6.767e-10	1.808e-08	5.67	119.66
(B)	GEO up	7	Lung transplant rejection C0729958 human GSE2018 sample 66	Immune System Disorder	86	Transplant rejection	1	Lung transplant rejection	1	Mid / Long	5.767e-12	6.912e-10	3.37	87.1
(P+T)	GEO up	8	systemic lupus erythematosus DOID-9074 human GSE10325 sample 691	Immune System Disorder	86	Autoimmune disease	68	lupus erythematosus, syatematic	29	Mid / Long	1.375e-45	1.648e-43	4.61	476.26
(T-1)	GEO up	8	systemic lupus erythematosus DOID-9074 human GSE10325 sample 692	Immune System Disorder	86	Autoimmune disease	68	lupus erythematosus, syatematic	29	Mid / Long	3.117e-29	2.906e-27	20.2	1326.02
(T-1)	TopFun	8	Lupus Erythematosus, Systemic	Immune System Disorder	86	Autoimmune disease	68	lupus erythematosus, syatematic	29	Mid / Long	2.807e-11
(P)	GWAS Catalog	8	Multiple sclerosis and triglyceride levels (pleiotropy)	Immune System Disorder	86	Autoimmune disease	68	Multiple Sclerosis	2	Mid / Long	0.04012	1	24.51	78.82
(P+T)	DisGeNET	8	C1q DEFICIENCY	Immune System Disorder	86	Immunodeficiency	10	C1q Deficiency	8	Mid / Long / Genetic	0.0002175	0.009097	10.52	88.68
(I+P+T)	DisGeNET	8	C1q DEFICIENCY	Immune System Disorder	86	Immunodeficiency	10	C1q Deficiency	8	Mid / Long / Genetic	0.0005124	0.0241	8.43	63.89
(B)	Rare Diseases	9	Autoimmune enteropathy	Immune System Disorder	86	Autoimmune disease	68	Autoimmune enteropathy	1	Mid / Long	7.831e-11	1.953e-08	4.03	93.71
(I+P+T+B)	GWAS Catalog	9	Neuromyelitis optica	Immune System Disorder	86	Autoimmune disease	68	Neuromyelitis optica	4	Mid / Long	0.004111	0.2304	5.12	28.11
(T-1)	PheWeb	9	Polymyalgia Rheumatica	Immune System Disorder	86	Autoimmune disease	68	Polymyalgia Rheumatica	1	Mid / Long	0.04315	1	22.73	71.43
(P+T+I+B)	TopFun	9	Autoimmune Diseases	Immune System Disorder	86	Autoimmune disease	68	Autoimmune diseases	10	Mid / Long	1.47e-86
(I+P+T)	PheWeb	9	Graves' disease	Immune System Disorder	86	Hyperthyroidism	3	Graves' disease	3	Mid / Long	0.0311	1	2.75	9.54
(I+P+T+B)	GWAS Catalog	10	Neuromyelitis optica (AQP4-IgG-positive)	Immune System Disorder	86	Autoimmune disease	68	Neuromyelitis optica	4	Mid / Long	0.004111	0.2232	5.12	28.11
(I+P+T+B)	PheWeb	10	Psoriasis and related disorders	Immune System Disorder	86	Autoimmune disease of Skin	68	Psoriasis and related disorders	5	Mid / Long	0.01822	1	2.18	8.72
(B)	PheWeb	10	Psoriasis vulgaris	Immune System Disorder	86	Autoimmune disease of Skin	68	Psoriasis vulgaris	5	Mid / Long	0.008037	1	3.95	19.04
(I+P+T+B)	DisGeNET	11	Lupus Erythematosus	Immune System Disorder	86	Autoimmune disease	68	lupus erythematosus	5	Mid / Long	1.104e-41	1.507e-39	3.68	347.16
(T-1)	GEO up	11	systemic lupus erythematosus (SLE) DOID-9074 human GSE36700 sample 512	Immune System Disorder	86	Autoimmune disease	68	lupus erythematosus, syatematic	29	Mid / Long	4.431e-28	2.86e-26	20.05	1263.04
(T-1)	OMIM Expanded	11	immunodeficiency	Immune System Disorder	86	Immunodeficiency	10	Immunodeficiency	2	Mid / Long	0.3714	1	2.16	2.14
(T-2)	GEO up	12	systemic lupus erythematosus (SLE) DOID-9074 human GSE36700 sample 512	Immune System Disorder	86	Autoimmune disease	68	lupus erythematosus, syatematic	29	Mid / Long	1.159e-29	8.105e-28	4.6	306.38
(B)	GEO up	12	systemic lupus erythematosus DOID-9074 human GSE10325 sample 691	Immune System Disorder	86	Autoimmune disease	68	lupus erythematosus, syatematic	29	Mid / Long	6.274e-11	4.386e-09	3.03	71.15
(T-1)	GEO up	12	systemic lupus erythematosus DOID-9074 human GSE10325 sample 693	Immune System Disorder	86	Autoimmune disease	68	lupus erythematosus, syatematic	29	Mid / Long	4.711e-29	3.953e-27	18.31	1194.15
(B)	GWAS Catalog	12	Myasthenia gravis	Immune System Disorder	86	Autoimmune disease	68	Myasthenia gravis	1	Mid / Long	0.0009463	0.04325	13.42	93.46
(T-2)	OMIM Expanded	12	c2deficiency	Immune System Disorder	86	Immunodeficiency	10	C1q Deficiency	8	Mid / Long / Genetic	0.2037	1	1.46	2.32
(P+T)	GEO up	13	Neuromyelitis optica	Immune System Disorder	86	Autoimmune disease	68	lupus erythematosus	5	Mid / Long	3.581e-33	2.311e-31	4.26	318.48
(I+P+T)	GEO up	13	lupus erythematosus DOID-8857 human GSE30153 sample 739	Immune System Disorder	86	Autoimmune disease	68	lupus erythematosus	5	Mid / Long	1.086e-26	7.011e-25	3.46	206.67
(T-2)	GEO up	13	systemic lupus erythematosus DOID-9074 human GSE10325 sample 691	Immune System Disorder	86	Autoimmune disease	68	lupus erythematosus, syatematic	29	Mid / Long	9.553e-32	8.905e-30	4.23	302.38
(B)	GEO up	14	discoid lupus erythematosus UMLS CUI-C0024138 human GSE52471 sample 689	Immune System Disorder	86	Autoimmune disease	68	lupus erythematosus (discoid)	6	Mid / Long	2.133e-10	1.193e-08	3.06	68.08
(T-1)	GWAS Catalog	14	Systemic lupus erythematosus and Systemic sclerosis	Immune System Disorder	86	Autoimmune disease	68	lupus erythematosus, syatematic	29	Mid / Long	0.003807	1	21.65	120.58
(B)	PheWeb	14	Psoriasis and related disorders	Immune System Disorder	86	Autoimmune disease of Skin	68	Psoriasis and related disorders	5	Mid / Long	0.01149	1	3.63	16.2
(P)	OMIM Expanded	15	Autoimmune disease	Immune System Disorder	86	Autoimmune disease	68	Autoimmune diseases	10	Mid / Long	0.01903	0.2373	5.32	21.06
(I+P+T+B)	GEO up	15	lupus erythematosus DOID-8857 human GSE30153 sample 739	Immune System Disorder	86	Autoimmune disease	68	lupus erythematosus	5	Mid / Long	9.508e-26	5.698e-24	2.9	167.29
(P+T)	OMIM Expanded	15	c2deficiency	Immune System Disorder	86	Immunodeficiency	10	C1q Deficiency	8	Mid / Long / Genetic	0.05845	0.7287	1.75	4.98
(T-1)	GEO up	16	systemic lupus erythematosus DOID-9074 human GSE10325 sample 691	Immune System Disorder	86	Autoimmune disease	68	lupus erythematosus, syatematic	29	Mid / Long	4.821e-28	2.889e-26	16.9	1062.99
(P)	OMIM Expanded	16	bare lymphocyte syndrome	Immune System Disorder	86	Lymphocyte syndrome	1	Bare lymphocyte syndrome	1	Congenital / Genetic	0.01903	0.2225	5.32	21.06
(I+P+T+B)	PheWeb	16	Graves' disease	Immune System Disorder	86	Hyperthyroidism	3	Graves' disease	3	Mid / Long	0.0366	1	2.34	7.72
(I+P+T+B)	OMIM Expanded	16	c2deficiency	Immune System Disorder	86	Immunodeficiency	10	C1q Deficiency	8	Mid / Long / Genetic	7.296e-08	8.527e-07	2.88	47.41
(I+P+T+B)	GEO up	17	discoid lupus erythematosus UMLS CUI-C0024138 human GSE52471 sample 689	Immune System Disorder	86	Autoimmune disease	68	lupus erythematosus (discoid)	6	Mid / Long	5.989e-25	3.35e-23	2.79	155.35
(T-1)	Rare Diseases	17	Autoimmune polyglandular syndrome type 2	Immune System Disorder	86	Autoimmune disease	68	Polyglandular syndrome type 2	1	Mid / Long / Genetic	7.49e-30	9.887e-28	28.41	1905.23
(I+P+T+B)	PheWeb	17	Psoriasis vulgaris	Immune System Disorder	86	Autoimmune disease of Skin	68	Psoriasis vulgaris	5	Mid / Long	0.0306	1	2.11	7.35
(P+T)	TopFun	17	Autoimmune Diseases	Immune System Disorder	86	Autoimmune disease	68	Autoimmune diseases	10	Mid / Long	5.945e-16
(T-1)	Rare Diseases	18	Antisynthetase syndrome	Immune System Disorder	86	Autoimmune disease	68	Antisynthetase syndrome	1	Mid / Long	3.286e-28	4.097e-26	27.27	1725.89
(B)	OMIM Expanded	18	celiac disease	Immune System Disorder	86	Autoimmune disease	68	Celiac disease	1	Mid / Long	5.733e-09	7.147e-08	5.31	100.77
(T-2)	GEO up	18	lupus erythematosus DOID-8857 human GSE30153 sample 739	Immune System Disorder	86	Autoimmune disease	68	lupus erythematosus	5	Mid / Long	3.221e-24	1.351e-22	4	216.38
(P+T)	GEO up	18	discoid lupus erythematosus UMLS CUI-C0024138 human GSE52471 sample 689	Immune System Disorder	86	Autoimmune disease	68	lupus erythematosus (discoid)	6	Mid / Long	3.127e-28	1.749e-26	3.81	241.41
(B)	TopFun	18	Lupus Erythematosus, Systemic	Immune System Disorder	86	Autoimmune disease	68	lupus erythematosus, syatematic	29	Mid / Long	2.539e-118
(I)	TopGene	18	Lupus Erythematosus, Systemic	Immune System Disorder	86	Autoimmune disease	68	lupus erythematosus, syatematic	29	Mid / Long	2.539e-118
(T-1)	TopGene	18	Lupus Erythematosus, Systemic	Immune System Disorder	86	Autoimmune disease	68	lupus erythematosus, syatematic	29	Mid / Long	2.539e-118
(P+T)	TopGene	18	Lupus Erythematosus, Systemic	Immune System Disorder	86	Autoimmune disease	68	lupus erythematosus, syatematic	29	Mid / Long	2.539e-118
(P+T+I)	TopGene	18	Lupus Erythematosus, Systemic	Immune System Disorder	86	Autoimmune disease	68	lupus erythematosus, syatematic	29	Mid / Long	2.539e-118
(P)	TopGene	18	Lupus Erythematosus, Systemic	Immune System Disorder	86	Autoimmune disease	68	lupus erythematosus, syatematic	29	Mid / Long	2.539e-118
(T-2)	TopGene	18	Lupus Erythematosus, Systemic	Immune System Disorder	86	Autoimmune disease	68	lupus erythematosus, syatematic	29	Mid / Long	2.539e-118
(T-1)	DisGeNET	18	Autoinflammatory disorder	Immune System Disorder	86	Autoinflammatory disorder	1	Autoinflammatory disorder	1	Short / Mid / Long	7.64e-06	0.003413	31.35	369.35
(I+P+T)	OMIM Expanded	18	c2deficiency	Immune System Disorder	86	Immunodeficiency	10	C1q Deficiency	8	Mid / Long / Genetic	0.01083	0.1066	1.97	8.91
(I+P+T)	GEO up	19	discoid lupus erythematosus UMLS CUI-C0024138 human GSE52471 sample 689	Immune System Disorder	86	Autoimmune disease	68	lupus erythematosus (discoid)	6	Mid / Long	1.303e-21	6.429e-20	3.06	147.02
(I+P+T+B)	DisGeNET	19	Lupus Erythematosus, Discoid	Immune System Disorder	86	Autoimmune disease	68	lupus erythematosus (discoid)	6	Mid / Long	8.611e-41	1.058e-38	3.62	334.1
(T-1)	Rare Diseases	19	Autoimmune polyglandular syndrome type 1	Immune System Disorder	86	Autoimmune disease	68	Polyglandular syndrome type 1	1	Mid / Long / Genetic	3.286e-28	3.881e-26	27.27	1725.89
(P+T+I+B)	TopFun	20	Multiple Sclerosis	Immune System Disorder	86	Autoimmune disease	68	Multiple Sclerosis	2	Mid / Long	1.63e-83
(B)	Rare Diseases	20	Hemophagocytic lymphohistiocytosis	Immune System Disorder	86	Lymphohistiocytosis	1	Hemophagocytic lymphohistiocytosis	1	Congenital / Genetic	3.7e-10	4.152e-08	3.89	84.54
(I)	PheWeb	20	Graves' disease	Immune System Disorder	86	Hyperthyroidism	3	Graves' disease	3	Mid / Long	0.05528	1	5.24	15.17
(P)	GEO up	1	Protozoan Infection C0033740 human GSE2077 sample 239	Infectious disease	154	Parasitic protozoa	7	Protozoan Infection	1	Short	1.689e-26	1.417e-23	13.65	809.99
(T-2)	GEO up	1	Dengue Fever DOID-12206 human GSE51808 sample 447	Infectious disease	154	Viral	116	Dengue	15	Short	6.641e-84	1.857e-81	7.58	1452.39
(P+T)	GEO up	1	dengue hemorrhagic fever DOID-12206 human GSE51808 sample 557	Infectious disease	154	Viral	116	Dengue	15	Short	1.038e-94	8.707e-92	6.83	1478.51
(I+P+T)	GEO up	1	dengue hemorrhagic fever DOID-12206 human GSE51808 sample 557	Infectious disease	154	Viral	116	Dengue	15	Short	8.917e-83	7.481e-80	5.58	1054.4
(I+P+T+B)	GEO up	1	dengue hemorrhagic fever DOID-12206 human GSE51808 sample 557	Infectious disease	154	Viral	116	Dengue	15	Short	2.794e-71	2.344e-68	4.26	692.2
(B)	TopFun	1	Hepatitis C	Infectious disease	154	Viral	116	Hepatitis C	21	Mid / Long	1.757e-155
(P+T+I+B)	TopFun	1	Hepatitis C	Infectious disease	154	Viral	116	Hepatitis C	21	Mid / Long	5.68e-123
(I)	TopGene	1	Hepatitis C	Infectious disease	154	Viral	116	Hepatitis C	21	Mid / Long	1.757e-155
(T-1)	TopGene	1	Hepatitis C	Infectious disease	154	Viral	116	Hepatitis C	21	Mid / Long	1.757e-155
(P+T)	TopGene	1	Hepatitis C	Infectious disease	154	Viral	116	Hepatitis C	21	Mid / Long	1.757e-155
(P+T+I)	TopGene	1	Hepatitis C	Infectious disease	154	Viral	116	Hepatitis C	21	Mid / Long	1.757e-155
(P)	TopGene	1	Hepatitis C	Infectious disease	154	Viral	116	Hepatitis C	21	Mid / Long	1.757e-155
(T-2)	TopGene	1	Hepatitis C	Infectious disease	154	Viral	116	Hepatitis C	21	Mid / Long	1.757e-155
(I)	GEO up	1	HIV - Human immunodeficiency virus infection C0019693 human GSE2504 sample 157	Infectious disease	154	Viral	116	HIV	8	Mid / Long	3.253e-06	0.002729	3.19	40.37
(I+P+T+B)	DisGeNET	1	Influenza	Infectious disease	154	Viral	116	Influenza	19	Short	2.704e-59	3.796e-56	3.24	436.6
(T-1)	TopFun	1	Influenza	Infectious disease	154	Viral	116	Influenza	19	Short	3.083e-58
(T-1)	GEO up	1	swine influenza DOID-0050211 human GSE48466 sample 498	Infectious disease	154	Viral	116	Influenza (Swine)	19	Short	3.891e-62	3.265e-59	36.68	5186.98
(T-1)	Rare Diseases	1	Parainfluenza virus type 3	Infectious disease	154	Viral	116	Parainfluenza virus type 3	2	Short	1.867e-59	4.189e-56	46.59	6300.42
(B)	DisGeNET	1	Virus Diseases	Infectious disease	154	Viral	116	Viral Enteritis	3	Short	2.035e-107	9.998e-104	6.23	1530.06
(P+T)	DisGeNET	2	Recurrent mycobacterial infections	Infectious disease	154	Bacterial Infections and Mycoses	23	mycobacterial infections (Recurrent)	3	Short / Mid / Long	4.842e-05	0.002735	9.86	97.94
(I+P+T)	DisGeNET	2	Recurrent mycobacterial infections	Infectious disease	154	Bacterial Infections and Mycoses	23	mycobacterial infections (Recurrent)	3	Short / Mid / Long	0.0001402	0.009439	7.91	70.15
(P+T)	GEO up	2	dengue disease DOID-12205 human GSE51808 sample 556	Infectious disease	154	Viral	116	Dengue	15	Short	2.188e-93	9.178e-91	6.77	1444.82
(I+P+T)	GEO up	2	dengue disease DOID-12205 human GSE51808 sample 556	Infectious disease	154	Viral	116	Dengue	15	Short	1.481e-80	6.211e-78	5.5	1010.73
(I+P+T+B)	GEO up	2	dengue disease DOID-12205 human GSE51808 sample 556	Infectious disease	154	Viral	116	Dengue	15	Short	3.666e-70	1.538e-67	4.23	675.6
(T-2)	GEO up	2	dengue hemorrhagic fever DOID-12206 human GSE51808 sample 557	Infectious disease	154	Viral	116	Dengue	15	Short	3.145e-87	2.639e-84	7.27	1448.81
(T-1)	DisGeNET	2	Enterovirus 71 infection	Infectious disease	154	Viral	116	Enterovirus 71 infection	4	Short	3.386e-07	0.0002377	64.94	967.43
(B)	DisGeNET	2	Hepatitis C	Infectious disease	154	Viral	116	Hepatitis C	21	Mid / Long	1.179e-99	1.656e-96	6.38	1452.65
(I)	GEO up	2	hepatitis C DOID-1883 human GSE20948 sample 599	Infectious disease	154	Viral	116	Hepatitis C	21	Mid / Long	9.696e-06	0.002712	3.47	40.07
(P+T)	OMIM Expanded	2	hiv	Infectious disease	154	Viral	116	HIV	8	Mid / Long	0.01975	1	2.02	7.92
(I+P+T)	OMIM Expanded	2	hiv	Infectious disease	154	Viral	116	HIV	8	Mid / Long	0.002859	0.2673	2.21	12.92
(P+T)	TopFun	2	Influenza	Infectious disease	154	Viral	116	Influenza	19	Short	2.133e-28
(P+T+I)	TopFun	2	Influenza	Infectious disease	154	Viral	116	Influenza	19	Short	5.018e-25
(T-1)	TopFun	2	Virus Diseases	Infectious disease	154	Viral	116	Virus Diseases	5	Short	3.226e-19
(T-1)	GEO up	2	West Nile fever DOID-2366 human GSE30719 sample 874	Infectious disease	154	Viral	116	West Nile fever	5	Short	4.377e-61	1.836e-58	22.64	3146.79
(B)	GEO up	2	Zaire ebolavirus DOID-4325 human GSE31747 sample 497	Infectious disease	154	Viral	116	Zaire ebolavirus	1	Short	5.927e-13	1.658e-10	3.6	101.42
(P+T)	OMIM Expanded	3	tuberculosis	Infectious disease	154	Bacterial Infections and Mycoses	23	Tuberculosis	12	Mid / Long	0.01975	1	2.02	7.92
(I+P+T)	OMIM Expanded	3	tuberculosis	Infectious disease	154	Bacterial Infections and Mycoses	23	Tuberculosis	12	Mid / Long	0.002859	0.1782	2.21	12.92
(T-2)	GEO up	3	dengue disease DOID-12205 human GSE51808 sample 556	Infectious disease	154	Viral	116	Dengue	15	Short	6.236e-86	2.616e-83	7.2	1413.47
(P+T)	GEO up	3	Dengue Fever DOID-12206 human GSE51808 sample 447	Infectious disease	154	Viral	116	Dengue	15	Short	5.524e-87	1.545e-84	6.94	1378.78
(I+P+T)	GEO up	3	Dengue Fever DOID-12206 human GSE51808 sample 447	Infectious disease	154	Viral	116	Dengue	15	Short	1.716e-75	4.799e-73	5.64	971.53
(I+P+T+B)	GEO up	3	Dengue Fever DOID-12206 human GSE51808 sample 447	Infectious disease	154	Viral	116	Dengue	15	Short	2.31e-66	6.461e-64	4.34	656.26
(I+P+T+B)	DisGeNET	3	Hepatitis C	Infectious disease	154	Viral	116	Hepatitis C	21	Mid / Long	6.055e-62	1.19e-58	2.94	414.2
(P+T+I)	TopFun	3	Hepatitis C	Infectious disease	154	Viral	116	Hepatitis C	21	Mid / Long	3.092e-21
(T-2)	OMIM Expanded	3	hiv	Infectious disease	154	Viral	116	HIV	8	Mid / Long	0.08747	1	1.75	4.25
(B)	OMIM Expanded	3	hiv	Infectious disease	154	Viral	116	HIV	8	Mid / Long	3.718e-11	2.318e-09	6.24	149.93
(I+P+T+B)	OMIM Expanded	3	hiv	Infectious disease	154	Viral	116	HIV	8	Mid / Long	1.206e-09	7.516e-08	3.23	66.27
(T-1)	DisGeNET	3	Influenza	Infectious disease	154	Viral	116	Influenza	19	Short	2.142e-29	2.105e-25	13.12	866.05
(P+T)	DisGeNET	3	Influenza	Infectious disease	154	Viral	116	Influenza	19	Short	6.916e-17	6.797e-13	2.52	93.67
(I+P+T)	DisGeNET	3	Influenza	Infectious disease	154	Viral	116	Influenza	19	Short	2.813e-14	2.764e-10	2.19	68.35
(B)	GEO up	3	swine influenza DOID-0050211 human GSE48466 sample 498	Infectious disease	154	Viral	116	Influenza (Swine)	19	Short	2.168e-12	4.547e-10	3.67	98.66
(T-1)	TopFun	3	Influenza A	Infectious disease	154	Viral	116	Influenza A	19	Short	5.583e-14
(P+T)	DisGeNET	4	Enterovirus 71 infection	Infectious disease	154	Viral	116	Enterovirus 71 infection	4	Short	9.36e-06	0.0007731	7.89	91.32
(I+P+T)	DisGeNET	4	Enterovirus 71 infection	Infectious disease	154	Viral	116	Enterovirus 71 infection	4	Short	3.975e-05	0.003617	6.33	64.09
(I)	GEO up	4	hepatitis C DOID-1883 human GSE20948 sample 601	Infectious disease	154	Viral	116	Hepatitis C	21	Mid / Long	1.559e-05	0.003271	3.35	37.04
(P+T)	TopFun	4	Hepatitis C	Infectious disease	154	Viral	116	Hepatitis C	21	Mid / Long	1.48e-22
(T-2)	GEO up	4	H1N1 DOID-0050211 human GSE27131 sample 514	Infectious disease	154	Viral	116	Influenza - H1N1	19	Short	6.157e-74	1.291e-71	6.2	1044.37
(P+T)	GEO up	4	H1N1 DOID-0050211 human GSE27131 sample 514	Infectious disease	154	Viral	116	Influenza - H1N2	19	Short	1.757e-69	3.685e-67	5.43	859.65
(I+P+T)	GEO up	4	H1N1 DOID-0050211 human GSE27131 sample 514	Infectious disease	154	Viral	116	Influenza - H1N3	19	Short	1.524e-62	3.196e-60	4.56	649.4
(I+P+T+B)	GEO up	4	H1N1 DOID-0050211 human GSE27131 sample 514	Infectious disease	154	Viral	116	Influenza - H1N4	19	Short	1.249e-52	2.619e-50	3.52	420.96
(T-1)	DisGeNET	4	Parainfluenza	Infectious disease	154	Viral	116	Parainfluenza	2	Short	7.97e-07	0.0004896	53.48	750.93
(T-1)	TopFun	4	Respiratory syncytial virus (RSV) infection in conditions classified elsewhere and of unspecified site	Infectious disease	154	Viral	116	Respiratory syncytial virus (RSV) infection	3	Short	3.127e-13
(I+P+T+B)	DisGeNET	4	Virus Diseases	Infectious disease	154	Viral	116	Viral Enteritis	3	Short	9.906e-64	3.245e-60	2.84	412.64
(T-1)	Rare Diseases	4	West nile virus	Infectious disease	154	Viral	116	West Nile viral infection	5	Short	9.159e-46	5.138e-43	38.64	4006.75
(T-2)	OMIM Expanded	5	malaria	Infectious disease	154	Parasitic protozoa	7	Malaria	6	Short	0.1119	1	1.65	3.61
(I+P+T+B)	OMIM Expanded	5	malaria	Infectious disease	154	Parasitic protozoa	7	Malaria	6	Short	5.854e-09	1.824e-07	3.05	57.81
(T-2)	GWAS Catalog	5	Susceptibility to persistent hepatitis B virus infection	Infectious disease	154	Viral	116	Hepatitis B virus infection susceptibility	3	Mid / Long	0.009955	0.786	6.25	28.83
(B)	DisGeNET	5	Hepatitis C, Chronic	Infectious disease	154	Viral	116	Hepatitis C	21	Mid / Long	3.379e-74	6.265e-72	8.14	1376.59
(T-1)	TopFun	5	Hepatitis C	Infectious disease	154	Viral	116	Hepatitis C	21	Mid / Long	1.458e-12
(T-1)	Rare Diseases	5	Rabies	Infectious disease	154	Viral	116	Rabies	2	Short	9.159e-46	4.11e-43	38.64	4006.75
(B)	GEO up	5	Rotavirus infection of children C1442797 human GSE2729 sample 43	Infectious disease	154	Viral	116	Rotavirus infection	2	Short	5.203e-12	7.275e-10	3.57	92.84
(T-1)	OMIM Expanded	6	tuberculosis	Infectious disease	154	Bacterial Infections and Mycoses	23	Tuberculosis	12	Mid / Long	0.3162	1	2.64	3.04
(P)	TopFun	6	Hepatitis B	Infectious disease	154	Viral	116	Hepatitis B	3	Short	1.282e-11
(P+T)	TopFun	6	Hepatitis B	Infectious disease	154	Viral	116	Hepatitis B	3	Short	8.056e-20
(P+T)	GWAS Catalog	6	Susceptibility to persistent hepatitis B virus infection	Infectious disease	154	Viral	116	Hepatitis B virus infection susceptibility	3	Mid / Long	0.016	0.9923	5.26	21.74
(I)	GEO up	6	hepatitis C DOID-1883 human GSE20948 sample 597	Infectious disease	154	Viral	116	Hepatitis C	21	Mid / Long	4.712e-05	0.004941	3.2	31.9
(T-1)	GEO up	6	Influenza C0021400 mouse GSE3203 sample 85	Infectious disease	154	Viral	116	Influenza	19	Short	1.342e-33	1.877e-31	20.26	1533.37
(T-1)	TopFun	6	Influenza	Infectious disease	154	Viral	116	Influenza	19	Short	5.96e-12
(I+P+T)	Rare Diseases	6	Marburg hemorrhagic fever	Infectious disease	154	Viral	116	Marburg hemorrhagic fever	4	Short	4.339e-32	1.623e-29	4.74	342.58
(B)	GWAS Catalog	6	Mumps	Infectious disease	154	Viral	116	Mumps	2	Short	0.0004866	0.02818	16.11	122.87
(I+P+T)	OMIM Expanded	7	malaria	Infectious disease	154	Parasitic protozoa	7	Malaria	6	Short	0.004969	0.1032	2.09	11.06
(T-1)	DisGeNET	7	Chikungunya Fever	Infectious disease	154	Viral	116	Chikungunya Fever	3	Short	2.425e-08	2.383e-05	33.26	583.2
(T-1)	TopFun	7	Chikungunya Fever	Infectious disease	154	Viral	116	Chikungunya Fever	3	Short	7.753e-12
(P+T+I)	TopFun	7	Hepatitis B	Infectious disease	154	Viral	116	Hepatitis B	3	Short	5.123e-16
(T-2)	Rare Diseases	7	Marburg hemorrhagic fever	Infectious disease	154	Viral	116	Marburg hemorrhagic fever	4	Short	1.17e-37	3.751e-35	6.47	550.44
(P)	PheWeb	7	Viral Enteritis	Infectious disease	154	Viral	116	Viral Enteritis	3	Short	0.08491	1	11.31	27.9
(T-2)	PheWeb	8	Posttraumatic wound infection not elsewhere classified	Infectious disease	154	Bacterial Infections and Mycoses	23	Posttraumatic wound infection	2	Short / Mid / Long	0.03638	1	3.13	10.36
(P+T)	OMIM Expanded	8	malaria	Infectious disease	154	Parasitic protozoa	7	Malaria	6	Short	0.02876	0.7684	1.91	6.77
(T-2)	DisGeNET	8	Enterovirus 71 infection	Infectious disease	154	Viral	116	Enterovirus 71 infection	4	Short	4.689e-05	0.009805	8.04	80.15
(P+T+I)	TopFun	8	Influenza	Infectious disease	154	Viral	116	Influenza	19	Short	1.439e-15
(P+T+I+B)	TopFun	8	Virus Diseases	Infectious disease	154	Viral	116	Virus Diseases	5	Short	4.35e-87
(B)	OMIM Expanded	9	infections	Infectious disease	154	Infectious disease	4	Infectious disease	4	Short	1.199e-09	2.491e-08	5.82	119.59
(I+P+T+B)	OMIM Expanded	9	tuberculosis	Infectious disease	154	Bacterial Infections and Mycoses	23	Tuberculosis	12	Mid / Long	2.332e-08	4.362e-07	3.02	53.05
(B)	GEO up	9	Infection by Yersinia enterocolitica C0238528 mouse GSE2973 sample 127	Infectious disease	154	Bacterial Infections and Mycoses	23	Yersinia enterocolitica	1	Short	5.385e-11	4.518e-09	3.31	78.34
(P)	DisGeNET	9	Infectious colitis	Infectious disease	154	Gastrointestinal disease	1	Infectious colitis	1	Short	0.0009426	0.04309	42.02	292.73
(T-1)	DisGeNET	9	HIV Wasting Syndrome	Infectious disease	154	Viral	116	HIV Wasting Syndrome	8	Mid / Long	0.0003962	0.06714	64.94	508.67
(I+P+T+B)	Rare Diseases	9	Marburg hemorrhagic fever	Infectious disease	154	Viral	116	Marburg hemorrhagic fever	4	Short	6.248e-30	1.558e-27	3.8	255.86
(I+P+T+B)	DisGeNET	9	Measles	Infectious disease	154	Viral	116	Measles	3	Short	1.33e-33	1.021e-31	4.74	358.5
(I+P+T+B)	DisGeNET	10	Hepatitis C, Chronic	Infectious disease	154	Viral	116	Hepatitis C	21	Mid / Long	8.83e-45	1.496e-42	3.43	348.2
(T-2)	TopFun	10	Hepatitis C	Infectious disease	154	Viral	116	Hepatitis C	21	Mid / Long	1.78e-12
(P+T)	TopFun	10	Influenza	Infectious disease	154	Viral	116	Influenza	19	Short	1.01e-17
(P+T)	Rare Diseases	10	Marburg hemorrhagic fever	Infectious disease	154	Viral	116	Marburg hemorrhagic fever	4	Short	8.039e-34	1.804e-31	5.52	420.68
(T-1)	TopFun	10	Respiratory Syncytial Virus Infections	Infectious disease	154	Viral	116	Respiratory syncytial virus (RSV) infection	3	Short	2.228e-10
(T-2)	OMIM Expanded	11	tuberculosis	Infectious disease	154	Bacterial Infections and Mycoses	23	Tuberculosis	12	Mid / Long	0.1742	1	1.53	2.67
(T-2)	PheWeb	11	Sexually transmitted infections (not HIV or hepatitis)	Infectious disease	154	Viral	116	Sexually transmitted infections (not HIV or hepatitis)	2	Short	0.05872	1	3.31	9.39
(T-1)	TopFun	11	Dengue Fever	Infectious disease	154	Viral	116	Dengue Fever	15	Short	1.314e-09
(P+T)	TopFun	11	Virus Diseases	Infectious disease	154	Viral	116	Virus Diseases	5	Short	1.022e-17
(I+P+T+B)	OMIM Expanded	12	infections	Infectious disease	154	Infectious disease	4	Infectious disease	4	Short	4.012e-08	6.252e-07	3.02	51.44
(T-1)	DisGeNET	12	Recurrent mycobacterial infections	Infectious disease	154	Bacterial Infections and Mycoses	23	mycobacterial infections (Recurrent)	3	Short / Mid / Long	0.0005268	0.07727	56.82	428.9
(P+T)	PheWeb	12	Posttraumatic wound infection not elsewhere classified	Infectious disease	154	Bacterial Infections and Mycoses	23	Posttraumatic wound infection	2	Short / Mid / Long	0.06199	1	2.63	7.31
(T-1)	Rare Diseases	12	Spotted fever	Infectious disease	154	Bacterial Infections and Mycoses	23	Spotted fever	1	Short	6.192e-35	1.158e-32	31.82	2506.23
(P)	Rare Diseases	12	Clostridium sordellii	Infectious disease	154	Bacterial Infections and Mycoses	23	Clostridium sordellii	1	Short	3.278e-14	6.13e-12	12.5	388.11
(I+P+T)	GWAS Catalog	12	Susceptibility to persistent hepatitis B virus infection	Infectious disease	154	Viral	116	Hepatitis B virus infection susceptibility	3	Mid / Long	0.02884	1	4.22	14.95
(I)	GEO up	12	hepatitis C DOID-1883 human GSE20948 sample 600	Infectious disease	154	Viral	116	Hepatitis C	21	Mid / Long	0.0004143	0.02674	2.88	22.42
(T-1)	TopFun	12	Rabies (disorder)	Infectious disease	154	Viral	116	Rabies	2	Short	1.374e-09
(P+T+I)	TopFun	12	Virus Diseases	Infectious disease	154	Viral	116	Virus Diseases	5	Short	1.672e-14
(I+P+T+B)	DisGeNET	13	Infection	Infectious disease	154	Infectious disease	4	Infectious disease	4	Short	1.701e-47	3.714e-45	3.18	342.92
(T-2)	DisGeNET	13	MYCOBACTERIUM TUBERCULOSIS, PROTECTION AGAINST	Infectious disease	154	Bacterial Infections and Mycoses	23	M. tuberculosis	12	Short	0.0002463	0.02603	7.82	64.95
(I+P+T)	DisGeNET	13	MYCOBACTERIUM TUBERCULOSIS, PROTECTION AGAINST	Infectious disease	154	Bacterial Infections and Mycoses	23	M. tuberculosis	12	Short	0.0001472	0.009707	6.33	55.81
(P)	GWAS Catalog	13	Malaria	Infectious disease	154	Parasitic protozoa	7	Malaria	6	Short	0.04012	1	24.51	78.82
(B)	DisGeNET	13	Measles	Infectious disease	154	Viral	116	Measles	3	Short	3.844e-46	2.171e-44	11.28	1179.89
(T-1)	TopFun	13	Zika Virus Infection	Infectious disease	154	Viral	116	Zika Virus Infection	1	Short	5.131e-09
(P+T)	DisGeNET	14	MYCOBACTERIUM TUBERCULOSIS, PROTECTION AGAINST	Infectious disease	154	Bacterial Infections and Mycoses	23	M. tuberculosis	12	Short	4.255e-05	0.002445	7.89	79.38
(T-2)	DisGeNET	14	MYCOBACTERIUM TUBERCULOSIS, SUSCEPTIBILITY TO (finding)	Infectious disease	154	Bacterial Infections and Mycoses	23	M. tuberculosis	12	Short	0.0002463	0.02576	7.82	64.95
(I+P+T)	DisGeNET	14	MYCOBACTERIUM TUBERCULOSIS, SUSCEPTIBILITY TO (finding)	Infectious disease	154	Bacterial Infections and Mycoses	23	M. tuberculosis	12	Short	0.0001472	0.009642	6.33	55.81
(P+T)	PheWeb	14	Sexually transmitted infections (not HIV or hepatitis)	Infectious disease	154	Viral	116	Sexually transmitted infections (not HIV or hepatitis)	2	Short	0.08892	1	2.78	6.74
(T-1)	GEO up	14	dengue disease DOID-12205 human GSE51808 sample 556	Infectious disease	154	Viral	116	Dengue	15	Short	1.545e-28	1.08e-26	17.58	1125.5
(T-1)	DisGeNET	14	Poxviridae Infections	Infectious disease	154	Viral	116	Poxviridae Infections	2	Short	0.0005268	0.07503	56.82	428.9
(T-1)	Rare Diseases	14	Togaviridae disease	Infectious disease	154	Viral	116	Togaviridae disease	1	Short	1.607e-31	2.575e-29	29.55	2094.95
(T-1)	TopFun	14	Vesicular Stomatitis	Infectious disease	154	Viral	116	Vesicular Stomatitis	1	Short	1.142e-08
(P)	TopFun	14	Virus Diseases	Infectious disease	154	Viral	116	Virus Diseases	5	Short	1.266e-09
(B)	DisGeNET	15	Infection	Infectious disease	154	Infectious disease	4	Infectious disease	4	Short	2.039e-73	3.515e-71	7.04	1178.13
(I+P+T+B)	DisGeNET	15	Bacterial Infections	Infectious disease	154	Bacterial Infections and Mycoses	23	Bacterial Infections	2	Short	7.202e-40	8.327e-38	3.76	339.13
(P+T)	DisGeNET	15	MYCOBACTERIUM TUBERCULOSIS, SUSCEPTIBILITY TO (finding)	Infectious disease	154	Bacterial Infections and Mycoses	23	M. tuberculosis	12	Short	4.255e-05	0.002431	7.89	79.38
(T-1)	Rare Diseases	15	Chikungunya	Infectious disease	154	Viral	116	Chikungunya Fever	3	Short	1.607e-31	2.404e-29	29.55	2094.95
(T-1)	TopFun	15	Measles	Infectious disease	154	Viral	116	Measles	3	Short	1.421e-08
(I+P+T+B)	GWAS Catalog	15	Mumps	Infectious disease	154	Viral	116	Mumps	2	Short	0.01169	0.3386	5.37	23.9
(T-1)	GEO up	15	Rhinovirus infection C0276447 human GSE11348 sample 324	Infectious disease	154	Viral	116	Rhinovirus infection	2	Short	1.067e-26	5.265e-25	17.84	1066.77
(I+P+T+B)	GEO up	16	swine influenza DOID-0050211 human GSE48466 sample 498	Infectious disease	154	Viral	116	Influenza (Swine)	19	Short	2.162e-24	1.134e-22	3.02	164.32
(B)	DisGeNET	16	Respiratory Syncytial Virus Infections	Infectious disease	154	Viral	116	Respiratory Syncytial Virus Infections	3	Short	3.086e-43	1.564e-41	12.03	1177.96
(T-1)	DisGeNET	16	West Nile viral infection	Infectious disease	154	Viral	116	West Nile viral infection	5	Short	2.926e-08	2.614e-05	22.1	383.3
(T-1)	TopFun	16	West Nile viral infection	Infectious disease	154	Viral	116	West Nile viral infection	5	Short	2.003e-08
(B)	GEO up	17	Severe acute respiratory syndrome (SARS) C1175175 human GSE1739 sample 165	Infectious disease	154	Viral	116	Coronavirus infectious - Severe acute respiratory syndrome (SARS)	1	Short	1.799e-08	4.313e-07	3.58	63.83
(T-1)	DisGeNET	17	Dengue Fever	Infectious disease	154	Viral	116	Dengue	15	Short	1.816e-11	4.462e-08	15.41	381.07
(T-1)	TopFun	17	West Nile Fever	Infectious disease	154	Viral	116	West Nile Fever	5	Short	3.019e-08
(I+P+T)	GEO up	18	Schistosomiases C0036323 mouse GSE19525 sample 439	Infectious disease	154	Parasitic flatworm	3	Schistosomiases	3	Short	1.692e-23	9.462e-22	2.82	147.7
(T-1)	TopFun	18	HIV-1 infection	Infectious disease	154	Viral	116	HIV-1 infection	8	Mid / Long	7.112e-08
(B)	DisGeNET	19	Bacterial Infections	Infectious disease	154	Bacterial Infections and Mycoses	23	Bacterial Infections	2	Short	7.983e-59	7.617e-57	8.66	1158.06
(P+T)	DisGeNET	19	Melioidosis	Infectious disease	154	Bacterial Infections and Mycoses	23	Melioidosis	1	Mid / Long	1.876e-05	0.001336	5.46	59.42
(T-2)	GEO up	19	Schistosomiases C0036323 mouse GSE19525 sample 439	Infectious disease	154	Parasitic flatworm	3	Schistosomiases	3	Short	4.328e-27	2.421e-25	3.56	216.04
(B)	OMIM Expanded	19	malaria	Infectious disease	154	Parasitic protozoa	7	Malaria	6	Short	5.733e-09	6.7e-08	5.31	100.77
(T-2)	GEO up	20	tuberculosis DOID-399 human GSE54992 sample 564	Infectious disease	154	Bacterial Infections and Mycoses	23	Tuberculosis	12	Mid / Long	1.246e-22	4.978e-21	4.23	213.34
(P+T)	GEO up	20	Schistosomiases C0036323 mouse GSE19525 sample 439	Infectious disease	154	Parasitic flatworm	3	Schistosomiases	3	Short	6.458e-29	3.87e-27	3.38	219.54
(P)	TopFun	20	Hepatitis C	Infectious disease	154	Viral	116	Hepatitis C	21	Mid / Long	6.027e-09
(T-1)	DisGeNET	20	Sindbis virus infection	Infectious disease	154	Viral	116	Sindbis virus infection	1	Short	0.0006754	0.08194	50.51	368.7
(B)	PheWeb	1	Disorders of bilirubin excretion	Liver Disease	20	Liver Disease	20	Bilirubin excretion disorder	2	Mid / Long	8.792e-05	0.1021	7.67	71.63
(I)	DisGeNET	1	Microvesicular hepatic steatosis	Liver Disease	20	Liver Disease	20	Microvesicular hepatic steatosis	1	Mid / Long	0.0006775	0.3171	16.43	119.89
(I+P+T+B)	PheWeb	2	Alcoholic liver damage	Liver Disease	20	Liver Disease	20	Alcoholic liver damage	2	Mid / Long	0.01458	1	3.2	13.52
(P+T+I+B)	TopFun	4	Liver diseases	Liver Disease	20	Liver Disease	20	Liver disease	3	Mid / Long	5.58e-91
(T-2)	TopFun	4	Liver Cirrhosis	Liver Disease	20	Liver Disease	20	Liver Cirrhosis	11	Mid / Long	3.19e-15
(P+T+I)	TopFun	4	Liver Cirrhosis	Liver Disease	20	Liver Disease	20	Liver Cirrhosis	11	Mid / Long	4.538e-17
(P+T)	TopFun	5	Liver Cirrhosis	Liver Disease	20	Liver Disease	20	Liver Cirrhosis	11	Mid / Long	6.585e-22
(B)	PheWeb	7	Alcoholic liver damage	Liver Disease	20	Liver Disease	20	Alcoholic liver damage	2	Mid / Long	0.01378	1	5.75	24.65
(T-2)	TopFun	8	Cirrhosis	Liver Disease	20	Liver Disease	20	Cirrhosis	11	Mid / Long	1.04e-12
(I+P+T+B)	PheWeb	9	Disorders of bilirubin excretion	Liver Disease	20	Liver Disease	20	Bilirubin excretion disorder	2	Mid / Long	0.02385	1	2.56	9.56
(T-2)	TopFun	9	Liver Cirrhosis, Experimental	Liver Disease	20	Liver Disease	20	Liver Cirrhosis	11	Mid / Long	1.45e-12
(P+T)	TopFun	12	Cirrhosis	Liver Disease	20	Liver Disease	20	Cirrhosis	11	Mid / Long	2.442e-17
(I+P+T+B)	DisGeNET	14	Liver Cirrhosis	Liver Disease	20	Liver Disease	20	Liver Cirrhosis	11	Mid / Long	6.596e-52	3.087e-49	2.9	341.38
(P+T+I+B)	TopFun	15	Liver Cirrhosis	Liver Disease	20	Liver Disease	20	Liver Cirrhosis	11	Mid / Long	2.24e-85
(P)	TopFun	16	Liver Cirrhosis	Liver Disease	20	Liver Disease	20	Liver Cirrhosis	11	Mid / Long	1.924e-09
(T-2)	TopFun	17	Liver diseases	Liver Disease	20	Liver Disease	20	Liver disease	3	Mid / Long	6.84e-11
(I+P+T+B)	DisGeNET	17	Cirrhosis	Liver Disease	20	Liver Disease	20	Cirrhosis	11	Mid / Long	3.16e-45	5.646e-43	3.29	336.85
(I+P+T+B)	DisGeNET	18	Liver diseases	Liver Disease	20	Liver Disease	20	Liver Disease	3	Mid / Long	1.091e-49	3.063e-47	2.98	336.44
(P)	OMIM Expanded	19	cholestasis	Liver Disease	20	Liver Disease	20	Cholestasis	1	Mid / Long	0.01903	0.1873	5.32	21.06
(P+T+I)	TopFun	19	Cirrhosis	Liver Disease	20	Liver Disease	20	Cirrhosis	11	Mid / Long	2.503e-13
(I)	Rare Diseases	4	Leydig cells hypoplasia	Male reproductive disease	2	Male reproductive disease	2	Leydig cells hypoplasia	1	Mid / Long	2.49e-07	0.0001397	4.82	73.28
(P)	GWAS Catalog	9	Erectile dysfunction in type 1 diabetes	Male reproductive disease	2	Male reproductive disease	2	Erectile dysfunction in type 1 diabetes	1	Mid / Long	0.04012	1	24.51	78.82
(I+P+T+B)	PheWeb	1	Adjustment reaction	Mental disorder	57	Sleep disorder	5	Adjustment reaction	5	Mid / Long	0.01458	1	3.2	13.52
(I)	GWAS Catalog	2	Depression (quantitative trait)	Mental disorder	57	Mood disorder	24	Depression	1	Short / Mid / Long	0.01369	1	10.95	47
(T-1)	Rare Diseases	3	Aicardi-Goutieres syndrome	Mental disorder	57	Cognitive disorder	9	Intellectual disability - Aicardi-Goutieres Syndrome 3	1	Congenital / Genetic	1.975e-55	1.478e-52	44.32	5582.38
(T-1)	PheWeb	3	Aphasia	Mental disorder	57	Cognitive disorder	9	Language disorder - Aphasia	2	Mid / Long	0.003454	1	22.73	128.82
(I+P+T)	PheWeb	3	Adjustment reaction	Mental disorder	57	Sleep disorder	5	Adjustment reaction	5	Mid / Long	0.02048	1	3.61	14.05
(P)	PheWeb	3	Circadian rhythm sleep disorder	Mental disorder	57	Sleep disorder	5	Adjustment reaction	5	Mid / Long	0.08491	1	11.31	27.9
(P+T)	PheWeb	4	Other persistent mental disorders due to conditions classified elsewhere	Mental disorder	57	Other	3	Other persistent mental disorders	3	Mid / Long	0.02899	1	3.32	11.76
(I)	PheWeb	4	Adjustment reaction	Mental disorder	57	Sleep disorder	5	Adjustment reaction	5	Mid / Long	0.02192	1	8.61	32.88
(B)	OMIM Expanded	6	Alzheimer disease	Mental disorder	57	Cognitive disorder - Autism	8	Alzheimer's Disease	3	Mid / Long	1.71e-10	6.395e-09	5.47	123.09
(T-1)	GWAS Catalog	6	Formal thought disorder in schizophrenia	Mental disorder	57	Cognitive disorder	9	Formal thought disorder in schizophrenia	1	Mid / Long	0.02181	1	45.45	173.88
(I+P+T+B)	DisGeNET	7	Alzheimer's Disease	Mental disorder	57	Cognitive disorder - Autism	8	Alzheimer's Disease	3	Mid / Long	3.732e-72	3.668e-68	2.2	362.53
(T-2)	OMIM Expanded	7	schizophrenia	Mental disorder	57	Delusional disorder	4	Schizophrenia	4	Mid / Long	0.1172	1	1.58	3.38
(B)	Rare Diseases	8	Mental deficiency-epilepsy-endocrine disorders	Mental disorder	57	Mental deficiency	1	Epilepsy-endocrine disorders	1	Mid / Long	1.593e-11	4.47e-09	4.16	103.45
(P)	Rare Diseases	9	Atkin syndrome	Mental disorder	57	Cognitive disorder	9	Intellectual disability - Atkin syndrome	1	Congenital / Genetic	3.278e-14	8.173e-12	12.5	388.11
(I+P+T)	OMIM Expanded	9	schizophrenia	Mental disorder	57	Delusional disorder	4	Schizophrenia	4	Mid / Long	0.004281	0.1334	2.01	10.96
(I)	PheWeb	9	Psychogenic and somatoform disorders	Mental disorder	57	Motor deterioration	2	Psychogenic and somatoform disorders	1	Mid / Long	0.03528	1	6.69	22.39
(T-1)	GEO up	10	Alzheimer's disease DOID-10652 human GSE36980 sample 523	Mental disorder	57	Cognitive disorder - Autism	8	Alzheimer's Disease	3	Mid / Long	9.666e-30	1.159e-27	19.33	1291.29
(T-1)	DisGeNET	10	Aicardi-Goutieres Syndrome 2	Mental disorder	57	Cognitive disorder	9	Intellectual disability - Aicardi-Goutieres Syndrome 2	1	Congenital / Genetic	0.0003962	0.066	64.94	508.67
(P)	DisGeNET	10	Memory performance	Mental disorder	57	Cognitive disorder	9	Memory performance	1	Mid / Long	0.0009426	0.04289	42.02	292.73
(B)	TopFun	10	Depressed mood	Mental disorder	57	Mood disorder	24	Depressed mood	7	Short / Mid / Long	3.872e-123
(I)	TopGene	10	Depressed mood	Mental disorder	57	Mood disorder	24	Depressed mood	7	Short / Mid / Long	3.872e-123
(T-1)	TopGene	10	Depressed mood	Mental disorder	57	Mood disorder	24	Depressed mood	7	Short / Mid / Long	3.872e-123
(P+T)	TopGene	10	Depressed mood	Mental disorder	57	Mood disorder	24	Depressed mood	7	Short / Mid / Long	3.872e-123
(P+T+I)	TopGene	10	Depressed mood	Mental disorder	57	Mood disorder	24	Depressed mood	7	Short / Mid / Long	3.872e-123
(P)	TopGene	10	Depressed mood	Mental disorder	57	Mood disorder	24	Depressed mood	7	Short / Mid / Long	3.872e-123
(T-2)	TopGene	10	Depressed mood	Mental disorder	57	Mood disorder	24	Depressed mood	7	Short / Mid / Long	3.872e-123
(B)	OMIM Expanded	12	dementia	Mental disorder	57	Cognitive disorder - Autism	8	Dementia	1	Mid / Long	3.945e-09	5.675e-08	5.43	105.06
(T-1)	GWAS Catalog	12	Schizophrenia or bipolar disorder	Mental disorder	57	Mood disorder	24	Bipolar disorder	2	Short / Mid / Long	0.02611	1	37.88	138.08
(P)	OMIM Expanded	13	asperger syndrome	Mental disorder	57	Cognitive disorder - Autism	8	Asperger syndrome	2	Congenital / Genetic	0.01903	0.2738	5.32	21.06
(T-1)	GEO up	13	autism spectrum disorder DOID-0060041 human GSE62632 sample 1036	Mental disorder	57	Cognitive disorder - Autism	8	Autism spectrum disorder	2	Congenital / Genetic	7.39e-27	4.133e-25	19.76	1189.13
(P)	GEO up	13	Down syndrome DOID-14250 human GSE16677 sample 1064	Mental disorder	57	Cognitive disorder	9	Intellectual disability - Down syndrome	1	Congenital / Genetic	5.062e-20	3.54e-18	10.42	463.03
(I)	OMIM Expanded	13	schizophrenia	Mental disorder	57	Delusional disorder	4	Schizophrenia	4	Mid / Long	0.033	0.4747	2.81	9.6
(P+T)	OMIM Expanded	13	schizophrenia	Mental disorder	57	Delusional disorder	4	Schizophrenia	4	Mid / Long	0.03838	0.5982	1.77	5.77
(I)	DisGeNET	14	Phencyclidine-Related Disorders	Mental disorder	57	Drug dependence	1	Phencyclidine-Related Disorders	1	Mid / Long	0.0072	0.687	15.06	74.3
(B)	TopFun	14	Depressive disorder	Mental disorder	57	Mood disorder	24	Depressive disorder	7	Short / Mid / Long	9.119e-120
(I)	TopGene	14	Depressive disorder	Mental disorder	57	Mood disorder	24	Depressive disorder	7	Short / Mid / Long	9.119e-120
(T-1)	TopGene	14	Depressive disorder	Mental disorder	57	Mood disorder	24	Depressive disorder	7	Short / Mid / Long	9.119e-120
(P+T)	TopGene	14	Depressive disorder	Mental disorder	57	Mood disorder	24	Depressive disorder	7	Short / Mid / Long	9.119e-120
(P+T+I)	TopGene	14	Depressive disorder	Mental disorder	57	Mood disorder	24	Depressive disorder	7	Short / Mid / Long	9.119e-120
(P)	TopGene	14	Depressive disorder	Mental disorder	57	Mood disorder	24	Depressive disorder	7	Short / Mid / Long	9.119e-120
(T-2)	TopGene	14	Depressive disorder	Mental disorder	57	Mood disorder	24	Depressive disorder	7	Short / Mid / Long	9.119e-120
(I+P+T)	PheWeb	14	Other persistent mental disorders due to conditions classified elsewhere	Mental disorder	57	Other	3	Other persistent mental disorders	3	Mid / Long	0.05794	1	2.66	7.59
(P)	GWAS Catalog	15	Relative hand skill in reading disability	Mental disorder	57	Cognitive disorder	9	Relative hand skill in reading disability	1	Mid / Long	0.01149	1	12.25	54.74
(B)	TopFun	15	Mental Depression	Mental disorder	57	Mood disorder	24	Mental Depression	7	Short / Mid / Long	5.469e-119
(I)	TopGene	15	Mental Depression	Mental disorder	57	Mood disorder	24	Mental Depression	7	Short / Mid / Long	5.469e-119
(T-1)	TopGene	15	Mental Depression	Mental disorder	57	Mood disorder	24	Mental Depression	7	Short / Mid / Long	5.469e-119
(P+T)	TopGene	15	Mental Depression	Mental disorder	57	Mood disorder	24	Mental Depression	7	Short / Mid / Long	5.469e-119
(P+T+I)	TopGene	15	Mental Depression	Mental disorder	57	Mood disorder	24	Mental Depression	7	Short / Mid / Long	5.469e-119
(P)	TopGene	15	Mental Depression	Mental disorder	57	Mood disorder	24	Mental Depression	7	Short / Mid / Long	5.469e-119
(T-2)	TopGene	15	Mental Depression	Mental disorder	57	Mood disorder	24	Mental Depression	7	Short / Mid / Long	5.469e-119
(T-1)	PheWeb	15	Adjustment reaction	Mental disorder	57	Sleep disorder	5	Adjustment reaction	5	Mid / Long	0.05989	1	16.23	45.7
(B)	GEO up	16	autism spectrum disorder DOID-0060041 human GSE25507 sample 1031	Mental disorder	57	Cognitive disorder - Autism	8	Autism spectrum disorder	2	Congenital / Genetic	6.919e-10	3.628e-08	3.15	66.51
(T-1)	GWAS Catalog	17	Depressive episodes in bipolar disorder	Mental disorder	57	Mood disorder	24	Bipolar disorder	2	Short / Mid / Long	0.0304	1	32.47	113.42
(I)	DisGeNET	17	Psychomotor deterioration	Mental disorder	57	Motor deterioration	2	Psychomotor deterioration	1	Mid / Long	0.0072	0.6676	15.06	74.3
(P)	GWAS Catalog	18	Language performance in older adults (adjusted for episodic memory)	Mental disorder	57	Cognitive disorder	9	Language performance	2	Mid / Long	0.05313	1	18.38	53.95
(I)	OMIM Expanded	19	asperger syndrome	Mental disorder	57	Cognitive disorder - Autism	8	Asperger syndrome	2	Congenital / Genetic	0.04939	0.4618	2.9	8.73
(T-2)	PheWeb	20	Other persistent mental disorders due to conditions classified elsewhere	Mental disorder	57	Other	3	Other persistent mental disorders	3	Mid / Long	0.07741	1	2.96	7.58
(T-2)	Rare Diseases	1	Beta-galactosidase-1 deficiency	Metabolic disorder	73	Beta-galactosidase-1 deficiency	4	Beta-galactosidase-1 deficiency	4	Congenital / Genetic	4.731e-47	1.062e-43	7.32	780.49
(T-1)	OMIM Expanded	1	diabetes	Metabolic disorder	73	Diabetes	14	Diabetes type 2	6	Mid / Long	0.04215	1	6.14	19.45
(T-2)	DisGeNET	2	Aspartylglucosaminuria	Metabolic disorder	73	Aspartylglucosaminuria	3	Aspartylglucosaminuria	3	Congenital / Genetic	0.0001104	0.01596	12.51	113.96
(P+T)	Rare Diseases	2	Beta-galactosidase-1 deficiency	Metabolic disorder	73	Beta-galactosidase-1 deficiency	4	Beta-galactosidase-1 deficiency	4	Congenital / Genetic	1.547e-42	1.735e-39	6.23	599.8
(I+P+T)	Rare Diseases	2	Beta-galactosidase-1 deficiency	Metabolic disorder	73	Beta-galactosidase-1 deficiency	4	Beta-galactosidase-1 deficiency	4	Congenital / Genetic	2.606e-39	2.924e-36	5.25	466.41
(I+P+T+B)	Rare Diseases	2	Beta-galactosidase-1 deficiency	Metabolic disorder	73	Beta-galactosidase-1 deficiency	4	Beta-galactosidase-1 deficiency	4	Congenital / Genetic	2.303e-37	2.584e-34	4.21	354.97
(P+T)	PheWeb	2	Secondary hyperparathyroidism (of renal origin)	Metabolic disorder	73	Endocrine system disease	6	Secondary hyperparathyroidism of renal origin	4	Mid / Long	0.01081	1	3.58	16.23
(T-2)	Rare Diseases	2	Gangliosidosis GM1 type 3	Metabolic disorder	73	Lysosomal storage disease	8	Gangliosidosis GM1 type 3	4	Congenital / Genetic	4.731e-47	5.308e-44	7.32	780.49
(T-1)	GWAS Catalog	3	C-reactive protein	Metabolic disorder	73	C-reactive protein	4	C-reactive protein	4	Short	0.0002769	0.2404	23.51	192.6
(P+T)	Rare Diseases	3	Gangliosidosis GM1 type 3	Metabolic disorder	73	Lysosomal storage disease	8	Gangliosidosis GM1 type 3	4	Congenital / Genetic	1.547e-42	1.157e-39	6.23	599.8
(I+P+T)	Rare Diseases	3	Gangliosidosis GM1 type 3	Metabolic disorder	73	Lysosomal storage disease	8	Gangliosidosis GM1 type 3	4	Congenital / Genetic	2.606e-39	1.949e-36	5.25	466.41
(I+P+T+B)	Rare Diseases	3	Gangliosidosis GM1 type 3	Metabolic disorder	73	Lysosomal storage disease	8	Gangliosidosis GM1 type 3	4	Congenital / Genetic	2.303e-37	1.723e-34	4.21	354.97
(T-1)	OMIM Expanded	4	diabetes mellitus	Metabolic disorder	73	Diabetes	14	Diabetes type 2	6	Mid / Long	0.2225	1	3.99	5.99
(T-2)	PheWeb	4	Secondary hyperparathyroidism (of renal origin)	Metabolic disorder	73	Endocrine system disease	6	Secondary hyperparathyroidism of renal origin	4	Mid / Long	0.02723	1	3.41	12.29
(T-2)	TopFun	5	Amyloidosis	Metabolic disorder	73	Amyloidosis	4	Amyloidosis (Aquired)	4	Mid / Long	2.23e-14
(B)	GEO up	6	Alpha-1 anti-trypsin deficiency C0221757 human GSE1122 sample 281	Metabolic disorder	73	Metabolic disorder	1	Alpha-1 anti-trypsin deficiency	1	Congenital / Genetic	3.435e-11	3.203e-09	3.74	90.13
(T-2)	OMIM Expanded	6	cholesterol level	Metabolic disorder	73	Cholesterol level	7	Cholesterol level	3	Short / Mid / Long	0.1172	1	1.63	3.5
(I+P+T)	PheWeb	6	Secondary hyperparathyroidism (of renal origin)	Metabolic disorder	73	Endocrine system disease	6	Secondary hyperparathyroidism of renal origin	4	Mid / Long	0.02598	1	2.88	10.5
(P+T)	DisGeNET	7	Aspartylglucosaminuria	Metabolic disorder	73	Aspartylglucosaminuria	3	Aspartylglucosaminuria	3	Congenital / Genetic	0.0002175	0.009135	10.52	88.68
(I+P+T)	DisGeNET	7	Aspartylglucosaminuria	Metabolic disorder	73	Aspartylglucosaminuria	3	Aspartylglucosaminuria	3	Congenital / Genetic	0.0005124	0.02421	8.43	63.89
(I+P+T+B)	GWAS Catalog	7	C-reactive protein	Metabolic disorder	73	C-reactive protein	4	C-reactive protein	4	Short	0.0001674	0.04846	3.4	29.53
(B)	GWAS Catalog	8	C-reactive protein	Metabolic disorder	73	C-reactive protein	4	C-reactive protein	4	Short	6.74e-07	0.0001951	8.33	118.39
(B)	DisGeNET	8	Hyperglycemia	Metabolic disorder	73	Glycemic trait	4	Hyperglycemia	4	Short / Mid / Long	5.451e-76	1.071e-73	7.21	1248.89
(P+T)	OMIM Expanded	9	cholesterol level	Metabolic disorder	73	Cholesterol level	7	Cholesterol level	3	Short / Mid / Long	0.03087	0.7216	1.89	6.56
(B)	TopFun	9	Diabetes Mellitus, Insulin-Dependent	Metabolic disorder	73	Diabetes	14	Diabetes Mellitus, Insulin-Dependent - Diabetes type 1	8	Mid / Long	6.13e-124
(I)	TopGene	9	Diabetes Mellitus, Insulin-Dependent	Metabolic disorder	73	Diabetes	14	Diabetes Mellitus, Insulin-Dependent - Diabetes type 1	8	Mid / Long	6.13e-124
(T-1)	TopGene	9	Diabetes Mellitus, Insulin-Dependent	Metabolic disorder	73	Diabetes	14	Diabetes Mellitus, Insulin-Dependent - Diabetes type 1	8	Mid / Long	6.13e-124
(P+T)	TopGene	9	Diabetes Mellitus, Insulin-Dependent	Metabolic disorder	73	Diabetes	14	Diabetes Mellitus, Insulin-Dependent - Diabetes type 1	8	Mid / Long	6.13e-124
(P+T+I)	TopGene	9	Diabetes Mellitus, Insulin-Dependent	Metabolic disorder	73	Diabetes	14	Diabetes Mellitus, Insulin-Dependent - Diabetes type 1	8	Mid / Long	6.13e-124
(P)	TopGene	9	Diabetes Mellitus, Insulin-Dependent	Metabolic disorder	73	Diabetes	14	Diabetes Mellitus, Insulin-Dependent - Diabetes type 1	8	Mid / Long	6.13e-124
(T-2)	TopGene	9	Diabetes Mellitus, Insulin-Dependent	Metabolic disorder	73	Diabetes	14	Diabetes Mellitus, Insulin-Dependent - Diabetes type 1	8	Mid / Long	6.13e-124
(T-2)	OMIM Expanded	10	hypercholesterolemia	Metabolic disorder	73	Cholesterol level	7	Hypercholesterolemia	3	Short / Mid / Long	0.1742	1	1.53	2.67
(T-1)	OMIM Expanded	10	diabetes mellitus, type 1	Metabolic disorder	73	Diabetes	14	Diabetes Mellitus, Insulin-Dependent - Diabetes type 1	8	Mid / Long	0.3658	1	2.21	2.22
(I)	OMIM Expanded	10	disorder of glycosylation	Metabolic disorder	73	Glycemic trait	4	Disorder of glycosylation	4	Mid / Long	0.02193	0.4101	3.14	11.98
(T-2)	Rare Diseases	10	Sandhoff disease	Metabolic disorder	73	Lysosomal storage disease	8	Sandhoff disease	4	Congenital / Genetic	1.156e-36	2.593e-34	6.38	527.85
(I+P+T)	Rare Diseases	10	Sandhoff disease	Metabolic disorder	73	Lysosomal storage disease	8	Sandhoff disease	4	Congenital / Genetic	2.232e-30	5.009e-28	4.62	315.25
(I+P+T)	OMIM Expanded	11	cholesterol level	Metabolic disorder	73	Cholesterol level	7	Cholesterol level	3	Short / Mid / Long	0.005514	0.1031	2.06	10.73
(B)	PheWeb	11	Hypothyroidism	Metabolic disorder	73	Endocrine system disease	6	Hypothyroidism	2	Mid / Long	0.01295	1	4.3	18.67
(I+P+T+B)	PheWeb	11	Secondary hyperparathyroidism (of renal origin)	Metabolic disorder	73	Endocrine system disease	6	Secondary hyperparathyroidism of renal origin	4	Mid / Long	0.02978	1	2.44	8.58
(T-1)	GWAS Catalog	11	Glycemic traits	Metabolic disorder	73	Glycemic trait	4	Glycemic trait	4	Mid / Long	0.02611	1	37.88	138.08
(I+P+T+B)	Rare Diseases	11	Sandhoff disease	Metabolic disorder	73	Lysosomal storage disease	8	Sandhoff disease	4	Congenital / Genetic	3.775e-29	7.7e-27	3.76	246.08
(I)	Rare Diseases	11	Type 1 plasminogen deficiency	Metabolic disorder	73	Plasminogen deficiency	1	Type 1 plasminogen deficiency	1	Congenital / Genetic	1.343e-06	0.000274	4.52	61.09
(I)	OMIM Expanded	12	diabetes mellitus, type 2	Metabolic disorder	73	Diabetes	14	Diabetes type 2	6	Mid / Long	0.03187	0.4967	2.84	9.79
(B)	PheWeb	12	Hypothyroidism NOS	Metabolic disorder	73	Endocrine system disease	6	Hypothyroidism	2	Mid / Long	0.01025	1	3.73	17.08
(I)	GWAS Catalog	12	Fat distribution (HIV)	Metabolic disorder	73	Fat	1	Fat distribution (HIV)	1	Mid / Long	0.0317	1	7.09	24.46
(P+T)	Rare Diseases	12	Sandhoff disease	Metabolic disorder	73	Lysosomal storage disease	8	Sandhoff disease	4	Congenital / Genetic	8.039e-34	1.503e-31	5.52	420.68
(I+P+T)	OMIM Expanded	13	hypercholesterolemia	Metabolic disorder	73	Cholesterol level	7	Hypercholesterolemia	3	Short / Mid / Long	0.007291	0.09738	2.06	10.13
(T-2)	OMIM Expanded	13	diabetes mellitus, type 2	Metabolic disorder	73	Diabetes	14	Diabetes type 2	6	Mid / Long	0.2041	1	1.42	2.25
(I)	GEO up	13	Gamma-hydroxybutyric acidaemia C0268631 mouse GSE2866 sample 311	Metabolic disorder	73	Acidaemia	1	neuro-Gamma-hydroxybutyric acidaemia	1	Short	0.0004005	0.028	2.76	21.62
(P+T)	OMIM Expanded	14	hypercholesterolemia	Metabolic disorder	73	Cholesterol level	7	Hypercholesterolemia	3	Short / Mid / Long	0.04522	0.604	1.83	5.68
(T-1)	PheWeb	14	Mixed hyperlipidemia	Metabolic disorder	73	Cholesterol level	7	Mixed hyperlipidemia	1	Mid / Long	0.05989	1	16.23	45.7
(T-2)	OMIM Expanded	14	obesity	Metabolic disorder	73	Obesity	1	Obesity	1	Mid / Long	0.2111	1	1.4	2.18
(P+T)	Rare Diseases	14	Erythropoietic protoporphyria	Metabolic disorder	73	Protoporphyria	4	Erythropoietic protoporphyria (Inherited)	4	Congenital / Genetic	5.435e-32	8.712e-30	5.36	386.07
(I+P+T)	OMIM Expanded	16	diabetes mellitus, type 2	Metabolic disorder	73	Diabetes	14	Diabetes type 2	6	Mid / Long	0.008982	0.105	1.91	9
(T-2)	DisGeNET	16	Dysglycemia	Metabolic disorder	73	Glycemic trait	4	Dysglycemia	4	Mid / Long	0.0008147	0.05639	8.34	59.31
(B)	TopFun	16	Metabolic Syndrome X	Metabolic disorder	73	Metabolic Syndrome X	7	Metabolic Syndrome X	7	Mid / Long	1.503e-118
(I)	TopGene	16	Metabolic Syndrome X	Metabolic disorder	73	Metabolic Syndrome X	7	Metabolic Syndrome X	7	Mid / Long	1.503e-118
(T-1)	TopGene	16	Metabolic Syndrome X	Metabolic disorder	73	Metabolic Syndrome X	7	Metabolic Syndrome X	7	Mid / Long	1.503e-118
(P+T)	TopGene	16	Metabolic Syndrome X	Metabolic disorder	73	Metabolic Syndrome X	7	Metabolic Syndrome X	7	Mid / Long	1.503e-118
(P+T+I)	TopGene	16	Metabolic Syndrome X	Metabolic disorder	73	Metabolic Syndrome X	7	Metabolic Syndrome X	7	Mid / Long	1.503e-118
(P)	TopGene	16	Metabolic Syndrome X	Metabolic disorder	73	Metabolic Syndrome X	7	Metabolic Syndrome X	7	Mid / Long	1.503e-118
(T-2)	TopGene	16	Metabolic Syndrome X	Metabolic disorder	73	Metabolic Syndrome X	7	Metabolic Syndrome X	7	Mid / Long	1.503e-118
(T-2)	Rare Diseases	16	Erythropoietic protoporphyria	Metabolic disorder	73	Protoporphyria	4	Erythropoietic protoporphyria (Inherited)	4	Congenital / Genetic	7.649e-32	1.073e-29	5.91	423.44
(I+P+T)	Rare Diseases	17	Erythropoietic protoporphyria	Metabolic disorder	73	Protoporphyria	4	Erythropoietic protoporphyria (Inherited)	4	Congenital / Genetic	4.529e-27	5.979e-25	4.36	264.74
(P+T)	TopFun	18	Amyloidosis	Metabolic disorder	73	Amyloidosis	4	Amyloidosis (Aquired)	4	Mid / Long	2.295e-15
(B)	GWAS Catalog	18	C-reactive protein levels	Metabolic disorder	73	C-reactive protein	4	C-reactive protein	4	Short	1.008e-05	0.00146	7.16	82.36
(B)	DisGeNET	18	Diabetes	Metabolic disorder	73	Diabetes	14	Diabetes type 2	6	Mid / Long	1.347e-102	2.206e-99	4.95	1162.08
(P+T)	Rare Diseases	18	Protoporphyria	Metabolic disorder	73	Protoporphyria	4	Protoporphyria	4	Short / Mid / Long	3.353e-30	4.18e-28	5.21	353.25
(T-2)	GWAS Catalog	19	Corrected insulin response	Metabolic disorder	73	Insulin response	2	Corrected insulin response	2	Mid / Long	0.03689	1	6.25	20.64
(I+P+T+B)	OMIM Expanded	20	amyloidosis	Metabolic disorder	73	Amyloidosis	4	Amyloidosis	4	Mid / Long	2.157e-07	1.754e-06	2.88	44.17
(P+T+I)	TopFun	20	Amyloidosis	Metabolic disorder	73	Amyloidosis	4	Amyloidosis (Aquired)	4	Mid / Long	3.556e-13
(T-2)	GWAS Catalog	20	Corrected insulin response adjusted for insulin sensitivity index	Metabolic disorder	73	Insulin response	2	Corrected insulin response	2	Mid / Long	0.03689	1	6.25	20.64
(I)	DisGeNET	20	Slender build	Metabolic disorder	73	Decreased body weigh	1	Slender build	1	Mid / Long	0.002162	0.4619	11.3	69.31
(P)	Rare Diseases	1	Oculopharyngeal muscular dystrophy	Musculoskeletal system disease	82	Myopathy	14	Oculopharyngeal muscular dystrophy	1	Mid / Long	5.157e-32	1.157e-28	22.06	1589.17
(I)	Rare Diseases	2	Paget disease of bone familial	Musculoskeletal system disease	82	Bone regeneration disease	2	Paget disease of bone familial	2	Congenital / Genetic	1.071e-09	1.201e-06	5.72	118.21
(P)	Rare Diseases	2	Paget disease of bone familial	Musculoskeletal system disease	82	Bone regeneration disease	2	Paget disease of bone familial	2	Congenital / Genetic	6.559e-22	7.36e-19	16.91	824.89
(B)	Rare Diseases	2	Amyopathic dermatomyositis	Musculoskeletal system disease	82	Myopathy	14	Amyopathic dermatomyositis	4	Mid / Long	3.12e-12	3.5e-09	4.3	113.8
(T-1)	GEO up	4	dermatomyositis DOID-10223 human GSE48280 sample 705	Musculoskeletal system disease	82	Bone inflammation disease	27	Dermatomyositis	1	Mid / Long	2.284e-48	6.387e-46	22.78	2498.95
(I+P+T+B)	GWAS Catalog	4	Myositis	Musculoskeletal system disease	82	Myopathy	14	Myositis	4	Mid / Long	0.0003616	0.04831	4.48	35.47
(T-1)	PheWeb	5	Unequal leg length (acquired)	Musculoskeletal system disease	82	Bone development disease	8	Unequal leg length (acquired)	1	Mid / Long	0.003807	0.8839	21.65	120.58
(I+P+T+B)	DisGeNET	5	Arthritis	Musculoskeletal system disease	82	Bone inflammation disease	27	Arthritis	10	Mid / Long	1.56e-55	1.095e-52	3.07	387.36
(T-2)	GEO up	5	systemic juvenile idiopathic arthritis (sJIA) DOID-848 human GSE21521 sample 574	Musculoskeletal system disease	82	Bone inflammation disease	27	Arthritis	10	Mid / Long	1.299e-53	1.816e-51	5.67	691.02
(P+T)	GEO up	5	systemic juvenile idiopathic arthritis (sJIA) DOID-848 human GSE21521 sample 574	Musculoskeletal system disease	82	Bone inflammation disease	27	Arthritis	10	Mid / Long	7.861e-54	1.319e-51	5.16	630.63
(I+P+T)	GEO up	5	systemic juvenile idiopathic arthritis (sJIA) DOID-848 human GSE21521 sample 574	Musculoskeletal system disease	82	Bone inflammation disease	27	Arthritis	10	Mid / Long	2.093e-44	3.512e-42	4.17	419.48
(I+P+T)	Rare Diseases	5	Pigmented villonodular synovitis	Musculoskeletal system disease	82	Bone inflammation disease	27	Pigmented villonodular synovitis	4	Mid / Long	5.854e-33	2.627e-30	4.81	356.77
(B)	OMIM Expanded	5	osteoporosis	Musculoskeletal system disease	82	Bone resorption disease	7	Osteoporosis	6	Mid / Long	3.657e-10	1.14e-08	5.86	127.4
(B)	GWAS Catalog	5	Myositis	Musculoskeletal system disease	82	Myopathy	14	Myositis	4	Mid / Long	6.085e-06	0.001057	11.51	138.18
(T-1)	DisGeNET	5	Polymyositis, Idiopathic	Musculoskeletal system disease	82	Myopathy	14	Polymyositis, Idiopathic	1	Mid / Long	0.0002838	0.05579	75.76	618.72
(I)	Rare Diseases	5	Schwartz Jampel syndrome type 1	Musculoskeletal system disease	82	Myopathy	14	Schwartz Jampel syndrome type 1	1	Congenital / Genetic	2.49e-07	0.0001117	4.82	73.28
(I+P+T)	OMIM Expanded	6	rheumatoid arthritis	Musculoskeletal system disease	82	Bone inflammation disease	27	Arthritis (Rheumatoid)	9	Mid / Long	0.004469	0.1194	2.11	11.41
(I+P+T+B)	DisGeNET	6	Rheumatoid Arthritis	Musculoskeletal system disease	82	Bone inflammation disease	27	Arthritis (Rheumatoid)	9	Mid / Long	7.359e-72	3.616e-68	2.26	370.39
(I)	DisGeNET	6	Hereditary Connective Tissue Disorder	Musculoskeletal system disease	82	Connective Tissue Disorder	1	Hereditary Connective Tissue Disorder	1	Congenital / Genetic	0.0008923	0.3813	15.06	105.75
(T-1)	DisGeNET	6	Polymyositis Ossificans	Musculoskeletal system disease	82	Myopathy	14	Polymyositis Ossificans	1	Mid / Long	0.0002838	0.0547	75.76	618.72
(I+P+T+B)	PheWeb	6	Contracture of palmar fascia [Dupuytren's disease]	Musculoskeletal system disease	82	Bone development disease	1	Palmar fascia	1	Mid / Long	0.01989	1	2.98	11.69
(I)	DisGeNET	7	Ulnar bowing	Musculoskeletal system disease	82	Bone development disease	8	Ulnar bowing	1	Mid / Long	0.001146	0.3883	13.9	94.14
(B)	DisGeNET	7	Arthritis	Musculoskeletal system disease	82	Bone inflammation disease	27	Arthritis	10	Mid / Long	1.748e-84	6.134e-82	6.6	1273.81
(I+P+T+B)	GEO up	7	systemic juvenile idiopathic arthritis (sJIA) DOID-848 human GSE21521 sample 574	Musculoskeletal system disease	82	Bone inflammation disease	27	Arthritis	10	Mid / Long	1.133e-40	1.358e-38	3.37	309.63
(P)	OMIM Expanded	7	rheumatoid arthritis	Musculoskeletal system disease	82	Bone inflammation disease	27	Arthritis (Rheumatoid)	9	Mid / Long	0.003327	0.08888	6.54	37.29
(P+T)	OMIM Expanded	7	rheumatoid arthritis	Musculoskeletal system disease	82	Bone inflammation disease	27	Arthritis (Rheumatoid)	9	Mid / Long	0.02676	0.8341	1.93	6.98
(I+P+T+B)	Rare Diseases	7	Pigmented villonodular synovitis	Musculoskeletal system disease	82	Bone inflammation disease	27	Pigmented villonodular synovitis	4	Mid / Long	1.013e-30	3.248e-28	3.85	265.87
(I)	Rare Diseases	7	Maffucci syndrome	Musculoskeletal system disease	82	Scleroderma	4	Maffucci syndrome	1	Mid / Long	1.343e-06	0.0004306	4.52	61.09
(T-1)	OMIM Expanded	8	rheumatoid arthritis	Musculoskeletal system disease	82	Bone inflammation disease	27	Arthritis (Rheumatoid)	9	Mid / Long	0.3282	1	2.53	2.81
(B)	OMIM Expanded	8	rheumatoid arthritis	Musculoskeletal system disease	82	Bone inflammation disease	27	Arthritis (Rheumatoid)	9	Mid / Long	6.767e-10	1.582e-08	5.67	119.66
(I+P+T+B)	OMIM Expanded	8	rheumatoid arthritis	Musculoskeletal system disease	82	Bone inflammation disease	27	Arthritis (Rheumatoid)	9	Mid / Long	1.819e-08	3.779e-07	2.98	53.19
(T-2)	Rare Diseases	8	Pigmented villonodular synovitis	Musculoskeletal system disease	82	Bone inflammation disease	27	Pigmented villonodular synovitis	4	Mid / Long	1.17e-37	3.282e-35	6.47	550.44
(P)	OMIM Expanded	8	spastic paraplegia	Musculoskeletal system disease	82	Hypertonia	1	Lower limb spasticity - spastic paraplegia	1	Congenital / Genetic	0.006563	0.1534	5.4	27.13
(I)	Rare Diseases	9	Melnick-Needles syndrome	Musculoskeletal system disease	82	Bone development disease	8	Melnick-Needles syndrome	1	Congenital / Genetic	1.343e-06	0.0003349	4.52	61.09
(T-1)	TopFun	9	Dermatomyositis, Childhood Type	Musculoskeletal system disease	82	Myopathy	14	Dermatomyositis, Childhood Type	4	Mid / Long	9.067e-11
(T-1)	PheWeb	10	Fracture of ribs	Musculoskeletal system disease	82	Bone fracture	5	Fracture of ribs	1	Mid / Long	0.04315	1	22.73	71.43
(I)	Rare Diseases	10	Sclerosteosis	Musculoskeletal system disease	82	Hyperostosis	1	Sclerosteosis	1	Congenital / Genetic	1.343e-06	0.0003014	4.52	61.09
(I)	DisGeNET	10	Increased endomysial connective tissue	Musculoskeletal system disease	82	Connective Tissue Disorder	1	Increased endomysial connective tissue	1	Mid / Long	0.00546	0.6465	17.21	89.68
(T-1)	Rare Diseases	10	Amyopathic dermatomyositis	Musculoskeletal system disease	82	Myopathy	14	Amyopathic dermatomyositis	4	Mid / Long	6.192e-35	1.389e-32	31.82	2506.23
(I)	GEO up	10	nemaline myopathy DOID-3191 mouse GSE3384 sample 971	Musculoskeletal system disease	82	Myopathy	14	Nemaline myopathy	1	Mid / Long	8.421e-05	0.007851	2.57	24.07
(P+T)	Rare Diseases	11	Pigmented villonodular synovitis	Musculoskeletal system disease	82	Bone inflammation disease	27	Pigmented villonodular synovitis	4	Mid / Long	8.039e-34	1.64e-31	5.52	420.68
(I+P+T+B)	OMIM Expanded	11	osteoporosis	Musculoskeletal system disease	82	Bone resorption disease	7	Osteoporosis	6	Mid / Long	3.128e-08	5.317e-07	2.98	51.57
(P)	DisGeNET	11	Post-Traumatic Osteoporosis	Musculoskeletal system disease	82	Bone resorption disease	7	Post-Traumatic Osteoporosis	6	Mid / Long	1.646e-07	2.609e-05	17.16	267.98
(T-1)	PheWeb	11	Fracture of pelvis	Musculoskeletal system disease	82	Bone fracture	5	Fracture of pelvis	1	Mid / Long	0.008192	1	14.66	70.45
(T-2)	DisGeNET	11	CREST Syndrome	Musculoskeletal system disease	82	Scleroderma	4	CREST Syndrome	3	Mid / Long	5.332e-06	0.002495	5.69	69.03
(B)	Rare Diseases	12	Felty's syndrome	Musculoskeletal system disease	82	Bone inflammation disease	27	Arthritis - Felty's syndrome	1	Mid / Long	7.831e-11	1.464e-08	4.03	93.71
(I+P+T)	DisGeNET	12	CREST Syndrome	Musculoskeletal system disease	82	Scleroderma	4	CREST Syndrome	3	Mid / Long	4.219e-06	0.0007028	4.6	56.93
(P)	DisGeNET	13	Osteoporosis, Senile	Musculoskeletal system disease	82	Bone resorption disease	7	Osteoporosis	6	Mid / Long	2.589e-07	3.975e-05	16.08	243.95
(P+T)	DisGeNET	13	CREST Syndrome	Musculoskeletal system disease	82	Scleroderma	4	CREST Syndrome	3	Mid / Long	4.081e-07	6.17e-05	5.74	84.38
(P+T+I+B)	TopFun	14	Arthritis	Musculoskeletal system disease	82	Bone inflammation disease	27	Arthritis	10	Mid / Long	1.24e-85
(P)	DisGeNET	14	Osteoporosis, Age-Related	Musculoskeletal system disease	82	Bone resorption disease	7	Osteoporosis	6	Mid / Long	8.674e-08	1.55e-05	14.35	233.29
(T-2)	Rare Diseases	14	Ceroid storage disease	Musculoskeletal system disease	82	Dystonic syndrome	3	Ceroid storage disease	3	Congenital / Genetic	8.708e-33	1.396e-30	6	443.2
(T-2)	DisGeNET	15	Bone necrosis	Musculoskeletal system disease	82	Bone degenerative disease	8	Bone necrosis	1	Mid / Long	1.737e-05	0.00502	5.63	61.69
(P+T+I)	TopFun	15	Degenerative polyarthritis	Musculoskeletal system disease	82	Bone degenerative disease	8	Degenerative polyarthritis	2	Mid / Long	8.745e-14
(I)	PheWeb	15	Osteoarthritis; localized	Musculoskeletal system disease	82	Bone inflammation disease	27	Osteoarthritis	1	Mid / Long	0.02492	1	4.76	17.56
(T-2)	PheWeb	15	Osteoporosis	Musculoskeletal system disease	82	Bone resorption disease	7	Osteoporosis	6	Mid / Long	0.0471	1	2.89	8.82
(I)	OMIM Expanded	15	muscular dystrophy	Musculoskeletal system disease	82	Myopathy	14	Muscular dystrophy	1	Mid / Long	0.03532	0.4718	2.76	9.24
(I)	DisGeNET	16	Pseudoepiphyses of the metacarpals	Musculoskeletal system disease	82	Bone development disease	8	Pseudoepiphyses of the metacarpals	1	Mid / Long	0.0072	0.674	15.06	74.3
(T-2)	PheWeb	16	Schmorl's nodes	Musculoskeletal system disease	82	Spine disease	2	Schmorl's nodes	2	Mid / Long	0.09613	1	3.75	8.79
(P)	GWAS Catalog	17	Arthritis (juvenile idiopathic)	Musculoskeletal system disease	82	Bone inflammation disease	27	Arthritis	10	Mid / Long	0.05313	1	18.38	53.95
(B)	DisGeNET	17	Rheumatoid Arthritis	Musculoskeletal system disease	82	Bone inflammation disease	27	Arthritis (Rheumatoid)	9	Mid / Long	4.82e-118	4.737e-114	4.34	1171.06
(P)	PheWeb	17	Gout and other crystal arthropathies	Musculoskeletal system disease	82	Bone inflammation disease	27	Gout and other crystal arthropathies	1	Mid / Long	0.1035	1	9.19	20.85
(I+P+T+B)	GWAS Catalog	17	Fractures	Musculoskeletal system disease	82	Bone fracture	5	Fractures	1	Mid / Long	0.0007994	0.08168	3.09	22.02
(P+T+I+B)	TopFun	18	Degenerative polyarthritis	Musculoskeletal system disease	82	Bone degenerative disease	8	Degenerative polyarthritis	2	Mid / Long	4.61e-84
(I)	Rare Diseases	18	Fibrodysplasia ossificans progressiva	Musculoskeletal system disease	82	Bone development disease	8	Fibrodysplasia ossificans progressiva	1	Mid / Long	6.749e-06	0.0008414	4.22	50.21
(T-1)	GEO up	18	JRA - Juvenile rheumatoid arthritis C0553662 human GSE7753 sample 176	Musculoskeletal system disease	82	Bone inflammation disease	27	Arthritis	10	Mid / Long	1.201e-24	4.8e-23	17.76	977.96
(I+P+T)	Rare Diseases	18	Ceroid storage disease	Musculoskeletal system disease	82	Dystonic syndrome	3	Ceroid storage disease	3	Congenital / Genetic	2.874e-26	3.583e-24	4.3	252.95
(I+P+T+B)	Rare Diseases	19	Polycystic lipomembranous osteodysplasia with sclerosing leukoencephalopathy	Musculoskeletal system disease	82	Bone dysplasia	3	Polycystic lipomembranous osteodysplasia with sclerosing leukoencephalopathy	3	Mid / Long	1.294e-27	1.528e-25	3.67	227.25
(T-2)	TopFun	19	Arthritis	Musculoskeletal system disease	82	Bone inflammation disease	27	Arthritis	10	Mid / Long	1.03e-10
(B)	GEO up	19	rheumatoid arthritis DOID-7148 human GSE10500 sample 779	Musculoskeletal system disease	82	Bone inflammation disease	27	Arthritis (Rheumatoid)	9	Mid / Long	1.205e-08	3.16e-07	3.36	61.19
(T-2)	PheWeb	19	Osteopenia or other disorder of bone and cartilage	Musculoskeletal system disease	82	Bone resorption disease	7	Osteopenia	1	Mid / Long	0.07741	1	2.96	7.58
(I+P+T)	Rare Diseases	19	Clayton-Smith Donnai syndrome	Musculoskeletal system disease	82	Clayton-Smith Donnai syndrome	1	Clayton-Smith Donnai syndrome	1	Congenital / Genetic	2.874e-26	3.394e-24	4.3	252.95
(P+T)	Rare Diseases	19	Ceroid storage disease	Musculoskeletal system disease	82	Dystonic syndrome	3	Ceroid storage disease	3	Congenital / Genetic	2.543e-29	3.004e-27	5.13	337.52
(T-2)	DisGeNET	19	Myositis, Focal	Musculoskeletal system disease	82	Myopathy	14	Myositis, Focal	4	Mid / Long	0.002674	0.1246	9.38	55.57
(P+T)	PheWeb	19	Schmorl's nodes	Musculoskeletal system disease	82	Spine disease	2	Schmorl's nodes	2	Mid / Long	0.1289	1	3.15	6.46
(I)	DisGeNET	19	Contracture	Musculoskeletal system disease	82	Tendonitis	1	Contracture	1	Mid / Long	7.472e-07	0.007343	5.08	71.67
(T-2)	Rare Diseases	20	Polycystic lipomembranous osteodysplasia with sclerosing leukoencephalopathy	Musculoskeletal system disease	82	Bone dysplasia	3	Polycystic lipomembranous osteodysplasia with sclerosing leukoencephalopathy	3	Mid / Long	6.559e-31	7.359e-29	5.82	404.22
(P+T)	Rare Diseases	20	Polycystic lipomembranous osteodysplasia with sclerosing leukoencephalopathy	Musculoskeletal system disease	82	Bone dysplasia	3	Polycystic lipomembranous osteodysplasia with sclerosing leukoencephalopathy	3	Mid / Long	2.543e-29	2.854e-27	5.13	337.52
(I)	Rare Diseases	20	Fibrous dysplasia	Musculoskeletal system disease	82	Bone fracture	5	Fibrous dysplasia	1	Mid / Long	6.749e-06	0.0007572	4.22	50.21
(P)	GEO up	20	Fracture of femur C0015802 rat GSE1685 sample 240	Musculoskeletal system disease	82	Bone fracture	5	Fracture of femur	1	Mid / Long	1.035e-19	6.203e-18	9.53	416.67
(T-1)	TopFun	20	Adult type dermatomyositis	Musculoskeletal system disease	82	Myopathy	14	Dermatomyositis	4	Mid / Long	2.306e-07
(T-2)	DisGeNET	20	Myositis, Infectious	Musculoskeletal system disease	82	Myopathy	14	Myositis, Infectious	4	Mid / Long	0.002674	0.124	9.38	55.57
(P)	TopFun	1	Cervix carcinoma	Neoplasm	135	Gynecologic	19	Cervix carcinoma	5	Mid / Long	3.316e-12
(I)	PheWeb	1	Cancer of larynx	Neoplasm	135	Head and neck cancer	11	Larynx cancer	2	Mid / Long	0.003606	1	9.51	53.51
(T-2)	TopFun	1	Liver carcinoma	Neoplasm	135	Liver cancer	17	Liver carcinoma	16	Mid / Long	3.99e-32
(P+T)	TopFun	1	Liver carcinoma	Neoplasm	135	Liver cancer	17	Liver carcinoma	16	Mid / Long	5.646e-34
(P+T+I)	TopFun	1	Liver carcinoma	Neoplasm	135	Liver cancer	17	Liver carcinoma	16	Mid / Long	4.926e-28
(P)	DisGeNET	1	Lung cancer stage I	Neoplasm	135	Liver cancer	17	Lung cancer	1	Mid / Long	2.507e-05	0.00224	49.02	519.3
(P)	OMIM Expanded	2	colon cancer	Neoplasm	135	Gastric / Colon	9	Colorectal cancer	4	Mid / Long	0.002592	0.2424	7	41.7
(P)	TopFun	2	Malignant tumor of cervix	Neoplasm	135	Gynecologic	19	Cervix carcinoma	5	Mid / Long	4.024e-12
(P)	GEO up	2	endometrial cancer DOID-1380 human GSE17025 sample 846	Neoplasm	135	Gynecologic	19	Endometrial cancer	9	Mid / Long	1.128e-22	1.578e-20	13.15	664.43
(B)	PheWeb	2	Multiple myeloma	Neoplasm	135	Hematologic	15	Multiple myeloma	8	Mid / Long	0.001418	0.5487	7.67	50.31
(P)	Rare Diseases	3	Rectosigmoid neoplasm	Neoplasm	135	Gastric / Colon	9	Rectosigmoid neoplasm	1	Mid / Long	6.559e-22	4.906e-19	16.91	824.89
(P)	TopFun	3	cervical cancer	Neoplasm	135	Gynecologic	19	Cervical cancer	5	Mid / Long	4.689e-12
(P)	GEO up	3	endometrial cancer DOID-1380 human GSE17025 sample 845	Neoplasm	135	Gynecologic	19	Endometrial cancer	9	Mid / Long	5.527e-23	9.275e-21	12.59	645.35
(I+P+T+B)	PheWeb	3	Multiple myeloma	Neoplasm	135	Hematologic	15	Multiple myeloma	8	Mid / Long	0.01458	1	3.2	13.52
(B)	OMIM Expanded	4	gastric cancer	Neoplasm	135	Gastric / Colon	9	Gastric cancer	4	Mid / Long	4.662e-11	2.179e-09	6.17	146.81
(P)	TopFun	4	Squamous cell carcinoma of the head and neck	Neoplasm	135	Head and neck cancer	11	Squamous cell carcinoma of the head and neck	1	Mid / Long	8.874e-12
(T-2)	OMIM Expanded	4	leukemia	Neoplasm	135	Hematologic	15	Leukemia	4	Mid / Long	0.1156	1	1.71	3.68
(T-1)	OMIM Expanded	5	sarcoma	Neoplasm	135	Bone / Cartilage	5	Sarcoma	2	Mid / Long	0.3101	1	2.71	3.17
(P)	GEO up	5	endometrial cancer DOID-1380 human GSE17025 sample 840	Neoplasm	135	Gynecologic	19	Endometrial cancer	9	Mid / Long	1.402e-21	1.681e-19	12.83	616.08
(P)	OMIM Expanded	5	ovarian cancer	Neoplasm	135	Gynecologic	19	Ovarian cancer	5	Mid / Long	0.003196	0.1195	6.61	37.98
(P)	TopFun	5	B-Cell Lymphomas	Neoplasm	135	Hematologic	15	Lymphomas (B-Cell)	2	Mid / Long	1.112e-11
(P+T+I)	TopFun	5	Liver neoplasms	Neoplasm	135	Liver cancer	17	Liver neoplasms	16	Mid / Long	1.247e-16
(P)	DisGeNET	5	Anaplastic Oligoastrocytoma	Neoplasm	135	Nervous system	14	Nervous system Neuro Anaplastic Oligoastrocytoma	1	Mid / Long	0.0006763	0.03274	49.02	357.79
(I)	GEO up	5	Neurofibromatosis DOID-8712 mouse GSE1482 sample 665	Neoplasm	135	Nervous system	14	Nervous system Neurofibromatosis	1	Mid / Long	3.974e-05	0.005557	3.41	34.55
(P)	DisGeNET	6	Stage IV Colorectal Cancer	Neoplasm	135	Gastric / Colon	9	Colorectal cancer	4	Mid / Long	6.469e-05	0.004709	36.76	354.63
(I+P+T+B)	OMIM Expanded	6	gastric cancer	Neoplasm	135	Gastric / Colon	9	Gastric cancer	4	Mid / Long	7.418e-09	1.982e-07	3.09	57.79
(P+T)	DisGeNET	6	Anaplastic Oligoastrocytoma	Neoplasm	135	Nervous system	14	Nervous system Anaplastic Oligoastrocytoma	2	Mid / Long	0.0002175	0.009175	10.52	88.68
(I+P+T)	DisGeNET	6	Anaplastic Oligoastrocytoma	Neoplasm	135	Nervous system	14	Nervous system Anaplastic Oligoastrocytoma	2	Mid / Long	0.0005124	0.02433	8.43	63.89
(I)	Rare Diseases	6	Conjunctival melanoma	Neoplasm	135	Skin	8	Melanoma	4	Mid / Long	1.343e-06	0.0005023	4.52	61.09
(T-2)	GEO up	7	Breast Cancer C0006142 human GSE3744 sample 24	Neoplasm	135	Breast cancer	20	Breast cancer	20	Mid / Long	1.334e-28	8.606e-27	6.46	414.7
(P)	DisGeNET	7	Stage IV Colorectal Cancer AJCC v7	Neoplasm	135	Gastric / Colon	9	Colorectal cancer	4	Mid / Long	8.368e-05	0.005874	33.94	318.62
(P)	GEO up	7	endometrial cancer DOID-1380 human GSE17025 sample 839	Neoplasm	135	Gynecologic	19	Endometrial cancer	9	Mid / Long	1.116e-20	8.511e-19	12.72	584.45
(P)	TopFun	7	Adult Liver Carcinoma	Neoplasm	135	Liver cancer	17	Liver Carcinoma	16	Mid / Long	5.398e-11
(P)	Rare Diseases	7	Muir-Torre syndrome	Neoplasm	135	Muir-Torre syndrome	1	Muir-Torre syndrome	1	Mid / Long	2.006e-15	6.431e-13	13.24	447.92
(P)	DisGeNET	8	Advanced breast cancer	Neoplasm	135	Breast cancer	20	Breast cancer	20	Mid / Long	0.0009426	0.04329	42.02	292.73
(T-2)	GEO up	8	breast cancer DOID-1612 human GSE3744 sample 978	Neoplasm	135	Breast cancer	20	Breast cancer	20	Mid / Long	1.051e-26	5.509e-25	6.09	364.56
(I)	Rare Diseases	8	Malignant germ cell tumor	Neoplasm	135	Germ cell	4	Malignant germ cell tumor	4	Mid / Long	1.343e-06	0.0003767	4.52	61.09
(P)	TopFun	8	Liver and Intrahepatic Biliary Tract Carcinoma	Neoplasm	135	Liver cancer	17	Liver Carcinoma (Liver and Intrahepatic Biliary Tract Carcinoma)	16	Mid / Long	7.508e-11
(P)	OMIM Expanded	9	adenoma	Neoplasm	135	Adenoma/ Adenocarcinoma	5	Adenoma/ Adenocarcinoma	5	Mid / Long	0.01727	0.3589	5.51	22.38
(T-2)	GEO up	9	sporadic breast cancer DOID-8029 human GSE3744 sample 979	Neoplasm	135	Breast cancer	20	Breast cancer (sporadic)	20	Mid / Long	3.574e-28	2.142e-26	5.53	349.79
(P)	TopFun	9	Malignant transformation	Neoplasm	135	Germ cell	4	Malignant germ cell tumor	4	Mid / Long	8.437e-11
(P)	GEO up	9	cervical cancer DOID-4362 human GSE9750 sample 619	Neoplasm	135	Gynecologic	19	Cervical cancer	5	Mid / Long	1.756e-21	1.637e-19	11.85	566.44
(T-1)	GEO up	9	multiple myeloma DOID-9538 human GSE36474 sample 707	Neoplasm	135	Hematologic	15	Multiple myeloma	8	Mid / Long	7.766e-27	4.072e-25	21.69	1303.78
(P+T)	TopFun	9	Multiple Myeloma	Neoplasm	135	Hematologic	15	Multiple myeloma	8	Mid / Long	6.456e-19
(P+T+I)	TopFun	9	Malignant neoplasm of liver	Neoplasm	135	Liver cancer	17	Liver cancer	16	Mid / Long	2.953e-15
(I)	GEO up	9	prostate cancer DOID-10283 human GSE3868 sample 638	Neoplasm	135	Prostate cancer	5	Prostate cancer	5	Mid / Long	0.0003723	0.02839	3.06	24.15
(I)	DisGeNET	9	Angiokeratoma	Neoplasm	135	Skin	8	Angiokeratoma	1	Mid / Long	0.00546	0.6544	17.21	89.68
(P)	OMIM Expanded	10	adenocarcinoma	Neoplasm	135	Adenoma/ Adenocarcinoma	5	Adenoma/ Adenocarcinoma	5	Mid / Long	0.01903	0.3559	5.32	21.06
(P+T)	GEO up	10	Breast Cancer C0006142 human GSE3744 sample 24	Neoplasm	135	Breast cancer	20	Breast cancer	20	Mid / Long	6.859e-27	3.197e-25	5.64	339.82
(I+P+T)	GEO up	10	Breast Cancer C0006142 human GSE3744 sample 24	Neoplasm	135	Breast cancer	20	Breast cancer	20	Mid / Long	5.392e-24	3.231e-22	4.69	251.36
(P)	GEO up	10	endometrial cancer DOID-1380 human GSE17025 sample 844	Neoplasm	135	Gynecologic	19	Endometrial cancer	9	Mid / Long	5.811e-19	2.868e-17	12.57	527.97
(B)	GEO up	10	Squamous cell carcinoma of mouth C0585362 human GSE3524 sample 295	Neoplasm	135	Head and neck cancer	11	Squamous cell carcinoma of mouth	1	Mid / Long	1.866e-11	1.957e-09	3.14	77.61
(P+T+I)	TopFun	10	Multiple Myeloma	Neoplasm	135	Hematologic	15	Multiple myeloma	8	Mid / Long	1.414e-14
(I)	GWAS Catalog	10	Prostate cancer (advanced)	Neoplasm	135	Prostate cancer	5	Prostate cancer (advanced)	5	Mid / Long	0.02501	1	8.03	29.63
(P)	TopFun	10	Brain Neoplasms	Neoplasm	135	Nervous system	14	Nervous system Brain Neoplasms/Glioblastoma/Glioma	7	Mid / Long	1.45e-10
(P)	Rare Diseases	10	Cerebral astrocytoma childhood	Neoplasm	135	Nervous system	14	Nervous system Cerebral astrocytoma childhood	1	Mid / Long	3.278e-14	7.356e-12	12.5	388.11
(P)	Rare Diseases	11	Chondroma	Neoplasm	135	Bone / Cartilage	5	Chondroma	3	Mid / Long	3.278e-14	6.687e-12	12.5	388.11
(B)	GWAS Catalog	11	Gastric adenocarcinoma (histologically verified)	Neoplasm	135	Gastric / Colon	9	Gastric adenocarcinoma	4	Mid / Long	0.0009463	0.04442	13.42	93.46
(I)	PheWeb	11	Hx of malignant neoplasm of oral cavity and pharynx	Neoplasm	135	Head and neck cancer	11	Pharynx	1	Mid / Long	0.03901	1	6.34	20.57
(B)	GEO up	11	LGLL - Large granular lymphocytic leukemia C1522378 human GSE10631 sample 47	Neoplasm	135	Hematologic	15	Leukemia	4	Mid / Long	6.157e-11	4.696e-09	3.08	72.37
(P)	TopFun	11	Multiple Myeloma	Neoplasm	135	Hematologic	15	Multiple myeloma	8	Mid / Long	1.473e-10
(T-2)	TopFun	11	Multiple Myeloma	Neoplasm	135	Hematologic	15	Multiple myeloma	8	Mid / Long	5.64e-12
(I)	GWAS Catalog	11	Prostate cancer (early onset)	Neoplasm	135	Prostate cancer	5	Prostate cancer (early onset)	5	Mid / Long	0.02501	1	8.03	29.63
(P)	GWAS Catalog	11	Glioblastoma (age-stratified)	Neoplasm	135	Nervous system	14	Nervous system Brain Neoplasms/Glioblastoma/Glioma	7	Mid / Long	0.04012	1	24.51	78.82
(P)	GEO up	11	Malignant Melanoma C0025202 human GSE3189 sample 117	Neoplasm	135	Skin	8	Melanoma	4	Mid / Long	8.239e-20	5.317e-18	10.92	480.05
(I+P+T)	GEO up	12	sporadic breast cancer DOID-8029 human GSE3744 sample 979	Neoplasm	135	Breast cancer	20	Breast cancer (sporadic)	20	Mid / Long	3.707e-23	1.944e-21	4.05	209.08
(I+P+T)	PheWeb	12	Cervical cancer and dysplasia	Neoplasm	135	Gynecologic	19	Cervical cancer	5	Mid / Long	0.04311	1	2.53	7.95
(P)	GEO up	12	endometrial cancer DOID-1380 human GSE17025 sample 841	Neoplasm	135	Gynecologic	19	Endometrial cancer	9	Mid / Long	1.185e-17	4.323e-16	11.89	463.58
(I+P+T+B)	DisGeNET	12	Multiple Myeloma	Neoplasm	135	Hematologic	15	Multiple myeloma	8	Mid / Long	2.033e-62	4.994e-59	2.43	345.07
(P)	TopFun	12	Malignant neoplasm of liver	Neoplasm	135	Liver cancer	17	Liver cancer	16	Mid / Long	1.482e-10
(I)	Rare Diseases	12	Acoustic neuroma	Neoplasm	135	Nervous system	14	Nervous system Neuroma (Acoustic neuroma)	1	Mid / Long	6.749e-06	0.001262	4.22	50.21
(P)	Rare Diseases	13	Enchondroma	Neoplasm	135	Bone / Cartilage	5	Enchondroma	3	Mid / Long	3.278e-14	5.658e-12	12.5	388.11
(I+P+T+B)	GEO up	13	Breast Cancer C0006142 human GSE3744 sample 24	Neoplasm	135	Breast cancer	20	Breast cancer	20	Mid / Long	8.809e-23	4.348e-21	3.79	192.7
(B)	OMIM Expanded	13	ovarian cancer	Neoplasm	135	Gynecologic	19	Ovarian cancer	5	Mid / Long	3.945e-09	5.27e-08	5.43	105.06
(I+P+T)	PheWeb	13	Cancer of larynx	Neoplasm	135	Head and neck cancer	11	Larynx cancer	2	Mid / Long	0.05794	1	2.66	7.59
(P)	TopFun	13	Secondary malignant neoplasm of liver	Neoplasm	135	Liver cancer	17	Liver cancer (Secondary malignant neoplasm of liver)	16	Mid / Long	3.767e-10
(P+T)	TopFun	13	Liver neoplasms	Neoplasm	135	Liver cancer	17	Liver neoplasms	16	Mid / Long	2.954e-17
(I)	PheWeb	13	Cancer of prostate	Neoplasm	135	Prostate cancer	5	Prostate cancer	5	Mid / Long	0.0216	1	5.02	19.25
(P)	PheWeb	13	Neoplasm of uncertain behavior	Neoplasm	135	Nervous system	14	Neoplasm of uncertain behavior	1	Mid / Long	0.09732	1	9.8	22.84
(I)	Rare Diseases	13	Acral lentiginous melanoma	Neoplasm	135	Skin	8	Melanoma	4	Mid / Long	6.749e-06	0.001165	4.22	50.21
(B)	GEO up	13	Urothelial carcinoma in situ C0334267 human GSE3167 sample 229	Neoplasm	135	Urothelial carcinoma	1	Urothelial carcinoma in situ	1	Mid / Long	9.442e-11	6.094e-09	3.04	70.12
(I)	OMIM Expanded	14	adenoma	Neoplasm	135	Adenoma/ Adenocarcinoma	5	Adenoma/ Adenocarcinoma	5	Mid / Long	0.04415	0.516	3.01	9.4
(I)	Rare Diseases	14	Cartilaginous cancer	Neoplasm	135	Bone / Cartilage	5	Cartilaginous cancer	3	Mid / Long	6.749e-06	0.001082	4.22	50.21
(B)	OMIM Expanded	14	breast cancer	Neoplasm	135	Breast cancer	20	Breast cancer	20	Mid / Long	1.648e-09	3.081e-08	5.11	103.41
(T-2)	TopFun	14	Chronic Lymphocytic Leukemia	Neoplasm	135	Hematologic	15	Leukemia (Chronic Lymphocytic Leukemia)	4	Mid / Long	2.92e-11
(I+P+T)	GEO up	15	breast cancer DOID-1612 human GSE3744 sample 978	Neoplasm	135	Breast cancer	20	Breast cancer	20	Mid / Long	1.341e-20	5.921e-19	4.27	195.41
(P)	DisGeNET	15	Mammary Carcinoma, Animal	Neoplasm	135	Breast cancer	20	Breast cancer	20	Mid / Long	4.454e-09	1.216e-06	11.16	214.53
(P+T)	GEO up	15	sporadic breast cancer DOID-8029 human GSE3744 sample 979	Neoplasm	135	Breast cancer	20	Breast cancer (sporadic)	20	Mid / Long	1.364e-27	7.152e-26	4.97	307.35
(I+P+T+B)	OMIM Expanded	15	ovarian cancer	Neoplasm	135	Gynecologic	19	Ovarian cancer	5	Mid / Long	5.531e-08	6.895e-07	2.92	48.75
(P)	TopFun	15	Nasopharyngeal carcinoma	Neoplasm	135	Head and neck cancer	11	Nasopharyngeal carcinoma	5	Mid / Long	1.636e-09
(P+T)	TopFun	15	Chronic Lymphocytic Leukemia	Neoplasm	135	Hematologic	15	Leukemia (Chronic Lymphocytic Leukemia)	4	Mid / Long	1.26e-16
(P)	Rare Diseases	15	Liver cancer	Neoplasm	135	Liver cancer	17	Liver cancer	16	Mid / Long	3.278e-14	4.904e-12	12.5	388.11
(B)	OMIM Expanded	15	glioblastoma	Neoplasm	135	Nervous system	14	Nervous system Brain Neoplasms/Glioblastoma/Glioma	7	Mid / Long	8.712e-09	8.574e-08	5.5	102.04
(I)	OMIM Expanded	16	adenocarcinoma	Neoplasm	135	Adenoma/ Adenocarcinoma	5	Adenoma/ Adenocarcinoma	5	Mid / Long	0.04939	0.5433	2.9	8.73
(P)	DisGeNET	16	Animal Mammary Neoplasms	Neoplasm	135	Breast cancer	20	Breast cancer	20	Mid / Long	4.454e-09	1.183e-06	11.16	214.53
(P+T)	GEO up	16	breast cancer DOID-1612 human GSE3744 sample 978	Neoplasm	135	Breast cancer	20	Breast cancer	20	Mid / Long	3.882e-24	1.416e-22	5.22	281.61
(T-2)	OMIM Expanded	16	colorectal cancer	Neoplasm	135	Gastric / Colon	9	Colorectal cancer	4	Mid / Long	0.24	1	1.35	1.93
(P)	GEO up	16	endometrial cancer DOID-1380 human GSE17025 sample 843	Neoplasm	135	Gynecologic	19	Endometrial cancer	9	Mid / Long	9.638e-18	3.85e-16	11.09	434.5
(P+T)	TopFun	16	Malignant neoplasm of liver	Neoplasm	135	Liver cancer	17	Liver cancer	16	Mid / Long	2.845e-16
(P+T+I)	TopFun	16	Adult Liver Carcinoma	Neoplasm	135	Liver cancer	17	Liver Carcinoma	16	Mid / Long	1.358e-13
(T-2)	TopFun	16	Liver neoplasms	Neoplasm	135	Liver cancer	17	Liver neoplasms	16	Mid / Long	3.56e-11
(P)	Rare Diseases	16	Malignant cylindroma	Neoplasm	135	Skin	8	Cylindrocarcinoma	1	Mid / Long	3.278e-14	4.597e-12	12.5	388.11
(T-2)	GWAS Catalog	17	BRCA1/2-negative high-risk breast cancer	Neoplasm	135	Breast cancer	20	Breast cancer	20	Mid / Long	0.008725	0.7976	4.69	22.24
(P)	TopFun	17	Mammary Carcinoma, Animal	Neoplasm	135	Breast cancer	20	Breast cancer	20	Mid / Long	4.634e-09
(P)	GEO up	17	endometrial cancer DOID-1380 human GSE17025 sample 842	Neoplasm	135	Gynecologic	19	Endometrial cancer	9	Mid / Long	9.638e-18	3.675e-16	11.09	434.5
(P)	DisGeNET	17	High grade serous carcinoma	Neoplasm	135	Gynecologic	19	High grade serous carcinoma (Endometrial cancer)	9	Mid / Long	4.886e-05	0.003842	19.61	194.64
(I)	PheWeb	17	Benign neoplasm of ovary	Neoplasm	135	Gynecologic	19	Ovary	5	Mid / Long	0.05102	1	5.48	16.3
(T-2)	GEO up	17	nasopharynx carcinoma DOID-9261 human GSE12452 sample 775	Neoplasm	135	Head and neck cancer	11	Nasopharyngeal carcinoma	5	Mid / Long	8.683e-22	3.312e-20	4.55	220.45
(P+T)	GEO up	17	nasopharynx carcinoma DOID-9261 human GSE12452 sample 775	Neoplasm	135	Head and neck cancer	11	Nasopharyngeal carcinoma	5	Mid / Long	8.65e-26	3.819e-24	4.52	260.64
(I+P+T)	GEO up	17	nasopharynx carcinoma DOID-9261 human GSE12452 sample 775	Neoplasm	135	Head and neck cancer	11	Nasopharyngeal carcinoma	5	Mid / Long	1.391e-20	5.836e-19	3.62	165.62
(T-2)	PheWeb	17	Myeloproliferative disease	Neoplasm	135	Hematologic	15	Myeloproliferative disease	1	Mid / Long	0.06777	1	3.13	8.42
(P+T+I)	TopFun	17	Liver and Intrahepatic Biliary Tract Carcinoma	Neoplasm	135	Liver cancer	17	Liver Carcinoma (Liver and Intrahepatic Biliary Tract Carcinoma)	16	Mid / Long	1.918e-13
(I+P+T+B)	OMIM Expanded	17	glioblastoma	Neoplasm	135	Nervous system	14	Nervous system Brain Neoplasms/Glioblastoma/Glioma	7	Mid / Long	1.637e-07	1.7e-06	2.91	45.51
(P)	DisGeNET	18	Mammary Neoplasms, Experimental	Neoplasm	135	Breast cancer	20	Breast cancer	20	Mid / Long	1.252e-08	3.002e-06	10.11	183.96
(P)	TopFun	18	Animal Mammary Neoplasms	Neoplasm	135	Breast cancer	20	Breast neoplasm	20	Mid / Long	4.634e-09
(I)	GEO up	18	Gastrointestinal stromal tumor C0238198 human GSE2719 sample 270	Neoplasm	135	Gastric / Colon	9	Gastrointestinal stromal tumor	4	Mid / Long	0.000589	0.03089	2.56	19.06
(P+T+I)	TopFun	18	Malignant transformation	Neoplasm	135	Germ cell	4	Malignant germ cell tumor	4	Mid / Long	2.19e-13
(I+P+T+B)	GEO up	18	nasopharynx carcinoma DOID-9261 human GSE12452 sample 775	Neoplasm	135	Head and neck cancer	11	Nasopharyngeal carcinoma	5	Mid / Long	6.065e-22	2.827e-20	3.16	154.14
(I)	GWAS Catalog	18	Event free survival in diffuse large B-cell lymphoma treated with immunochemotherapy	Neoplasm	135	Hematologic	15	Lymphoma	2	Mid / Long	0.09557	1	10.04	23.57
(I+P+T)	GWAS Catalog	18	Glioma	Neoplasm	135	Nervous system	14	Nervous system Brain Neoplasms/Glioblastoma/Glioma	7	Mid / Long	0.01157	1	3.04	13.54
(P)	Rare Diseases	18	Orbital melanoma	Neoplasm	135	Skin	8	Melanoma (Orbital)	4	Mid / Long	3.278e-14	4.086e-12	12.5	388.11
(T-1)	PheWeb	18	Secondary malignant neoplasm of skin	Neoplasm	135	Skin	8	Skin cancer (Secondary malignant neoplasm of skin)	1	Mid / Long	0.07225	1	13.37	35.13
(I)	GEO up	19	Adenoma C0001430 human GSE8514 sample 294	Neoplasm	135	Adenoma/ Adenocarcinoma	5	Adenoma/ Adenocarcinoma	5	Mid / Long	0.001616	0.04676	2.89	18.6
(I)	Rare Diseases	19	Fibrosarcoma	Neoplasm	135	Bone / Cartilage	5	Fibrosarcoma	2	Mid / Long	6.749e-06	0.0007971	4.22	50.21
(P+T)	TopFun	19	Malignant transformation	Neoplasm	135	Germ cell	4	Malignant germ cell tumor	4	Mid / Long	2.46e-15
(P)	Rare Diseases	19	Ovarian small cell carcinoma	Neoplasm	135	Gynecologic	19	Ovarian small cell carcinoma	5	Mid / Long	3.278e-14	3.871e-12	12.5	388.11
(P)	GEO up	19	esophagus squamous cell carcinoma DOID-3748 human GSE63941 sample 659	Neoplasm	135	Head and neck cancer	11	Esophagal cancer	1	Mid / Long	4.361e-15	9.629e-14	12.67	418.79
(P+T)	OMIM Expanded	19	glioblastoma	Neoplasm	135	Nervous system	14	Nervous system Brain Neoplasms/Glioblastoma/Glioma	7	Mid / Long	0.07935	0.7066	1.71	4.33
(T-1)	GEO up	19	pancreatic cancer DOID-1793 human GSE18670 sample 483	Neoplasm	135	Pancreatic cancer	1	Pancreatic cancer	1	Mid / Long	3.594e-25	1.508e-23	17.03	958.49
(I+P+T+B)	GEO up	20	breast cancer DOID-1612 human GSE3744 sample 978	Neoplasm	135	Breast cancer	20	Breast cancer	20	Mid / Long	9.086e-19	2.629e-17	3.42	142.13
(P+T)	DisGeNET	20	Mammary Neoplasms	Neoplasm	135	Breast cancer	20	Breast cancer	20	Mid / Long	1.643e-15	8.076e-12	1.63	55.34
(I+P+T+B)	DisGeNET	20	Liver neoplasms	Neoplasm	135	Liver cancer	17	Liver neoplasms	16	Mid / Long	1.457e-60	2.386e-57	2.4	330.54
(I)	GEO up	20	Cancer of prostate C0376358 human GSE3868 sample 135	Neoplasm	135	Prostate cancer	5	Prostate cancer	5	Mid / Long	0.001731	0.04686	2.87	18.24
(T-2)	OMIM Expanded	20	glioblastoma	Neoplasm	135	Nervous system	14	Nervous system Brain Neoplasms/Glioblastoma/Glioma	7	Mid / Long	0.2811	1	1.36	1.72
(B)	OMIM Expanded	20	nevus	Neoplasm	135	Skin	8	Nevus (type of Skin cancer)	1	Mid / Long	1.055e-08	8.577e-08	5.43	99.79
(P+T)	DisGeNET	1	Neonatal meningitis	Nervous system disease	84	Brain - Meningitis	6	Meningitis - Neonatal meningitis	3	Short / Mid / Long	1.916e-05	0.001355	11.27	122.38
(I+P+T)	DisGeNET	1	Neonatal meningitis	Nervous system disease	84	Brain - Meningitis	6	Meningitis - Neonatal meningitis	3	Short / Mid / Long	5.626e-05	0.004726	9.04	88.42
(P+T)	Rare Diseases	1	Nipah virus encephalitis	Nervous system disease	84	Brain - Viral encephalitis	12	Nipah virus encephalitis	4	Short / Mid	1.038e-47	2.329e-44	6.62	716.68
(I+P+T)	Rare Diseases	1	Nipah virus encephalitis	Nervous system disease	84	Brain - Viral encephalitis	12	Nipah virus encephalitis	4	Short / Mid	3.297e-41	7.399e-38	5.38	501.14
(I+P+T+B)	Rare Diseases	1	Nipah virus encephalitis	Nervous system disease	84	Brain - Viral encephalitis	12	Nipah virus encephalitis	4	Short / Mid	1.016e-42	2.279e-39	4.48	432.82
(T-1)	Rare Diseases	2	Aicardi syndrome	Nervous system disease	84	Aicardi syndrome	1	Aicardi syndrome	1	Congenital / Genetic	1.975e-55	2.216e-52	44.32	5582.38
(P)	GWAS Catalog	2	Whole-brain volume (Alzheimer's disease interaction)	Nervous system disease	84	Brain - Viral encephalitis	12	Whole-brain volume (Alzheimer's disease interaction)	1	Mid / Long	0.03354	1	29.41	99.85
(I+P+T)	PheWeb	2	Cervical radiculitis	Nervous system disease	84	Spinal nerve disease	7	Cervical radiculitis	5	Short / Mid / Long	0.006399	1	3.95	19.97
(I)	OMIM Expanded	3	ceroid-lipofuscinosis, neuronal	Nervous system disease	84	Neurodegenerative disease	28	Ceroid lipofuscinosis neuronal	19	Mid / Long / Genetic	0.01362	0.8487	3.54	15.23
(I)	Rare Diseases	3	Familial idiopathic basal ganglia calcification	Nervous system disease	84	Neurodegenerative disease	28	Familial idiopathic basal ganglia calcification	1	Mid / Long / Genetic	2.49e-07	0.0001862	4.82	73.28
(P)	DisGeNET	3	SPINOCEREBELLAR ATAXIA 17	Nervous system disease	84	Ataxia	6	Spinocerebellar ataxia type 17	1	Mid / Long / Genetic	5.813e-06	0.0006013	32.68	393.97
(T-2)	Rare Diseases	3	Unverricht-Lundborg disease	Nervous system disease	84	Brain - Epilepsy	4	Unverricht-Lundborg disease	4	Mid / Long	6.763e-45	5.059e-42	7.13	725.1
(P)	OMIM Expanded	3	leukodystrophy	Nervous system disease	84	Brain disease	10	Leukodystrophy	1	Short / Mid / Long	0.002706	0.1687	6.92	40.92
(P+T)	Rare Diseases	4	Unverricht-Lundborg disease	Nervous system disease	84	Brain - Epilepsy	4	Unverricht-Lundborg disease	4	Mid / Long	1.56e-40	8.753e-38	6.07	556.6
(I+P+T)	Rare Diseases	4	Unverricht-Lundborg disease	Nervous system disease	84	Brain - Epilepsy	4	Unverricht-Lundborg disease	4	Mid / Long	1.262e-35	7.082e-33	5	401.53
(I+P+T+B)	Rare Diseases	4	Unverricht-Lundborg disease	Nervous system disease	84	Brain - Epilepsy	4	Unverricht-Lundborg disease	4	Mid / Long	2.303e-37	1.292e-34	4.21	354.97
(I+P+T+B)	Rare Diseases	5	Ceroid lipofuscinosis neuronal 5	Nervous system disease	84	Neurodegenerative disease	28	Ceroid lipofuscinosis neuronal 5	19	Mid / Long / Genetic	1.609e-31	7.22e-29	3.89	276.13
(T-2)	Rare Diseases	5	Tay Sachs disease	Nervous system disease	84	Neurodegenerative disease	28	Tay Sachs disease	4	Short / Mid / Long	1.12e-39	5.027e-37	6.66	597.36
(B)	Rare Diseases	5	Dancing eyes-dancing feet syndrome	Nervous system disease	84	Ataxia	6	Dancing feet syndrome	3	Mid / Long	1.593e-11	7.151e-09	4.16	103.45
(T-1)	GWAS Catalog	5	Febrile seizures	Nervous system disease	84	Seizures	2	Febrile seizures	2	Short	0.02181	1	45.45	173.88
(T-2)	Rare Diseases	6	Ceroid lipofuscinosis neuronal 5	Nervous system disease	84	Neurodegenerative disease	28	Ceroid lipofuscinosis neuronal 5	19	Mid / Long / Genetic	1.17e-37	4.376e-35	6.47	550.44
(P+T)	Rare Diseases	6	Ceroid lipofuscinosis neuronal 5	Nervous system disease	84	Neurodegenerative disease	28	Ceroid lipofuscinosis neuronal 5	19	Mid / Long / Genetic	9.45e-35	3.534e-32	5.6	438.68
(I+P+T+B)	Rare Diseases	6	Ceroid lipofuscinosis neuronal 6	Nervous system disease	84	Neurodegenerative disease	28	Ceroid lipofuscinosis neuronal 6	19	Mid / Long / Genetic	1.609e-31	6.017e-29	3.89	276.13
(T-1)	Rare Diseases	6	West nile encephalitis	Nervous system disease	84	Brain - Viral encephalitis	12	West nile encephalitis	1	Short / Mid	6.702e-44	2.507e-41	37.5	3727.93
(I)	PheWeb	6	Other allied disorders of spine	Nervous system disease	84	Spinal nerve disease	7	Other allied disorders of spine	2	Mid / Long	0.02501	1	8.03	29.63
(P+T)	Rare Diseases	7	Tay Sachs disease	Nervous system disease	84	Neurodegenerative disease	28	Tay Sachs disease	4	Short / Mid / Long	9.45e-35	3.029e-32	5.6	438.68
(T-2)	DisGeNET	7	Neonatal meningitis	Nervous system disease	84	Brain - Meningitis	6	Meningitis - Neonatal meningitis	3	Short / Mid / Long	0.0002467	0.02552	10.72	89.06
(T-1)	Rare Diseases	7	Nipah virus encephalitis	Nervous system disease	84	Brain - Viral encephalitis	12	Nipah virus encephalitis	4	Short / Mid	6.702e-44	2.148e-41	37.5	3727.93
(I+P+T+B)	PheWeb	7	Cervical radiculitis	Nervous system disease	84	Spinal nerve disease	7	Cervical radiculitis	5	Short / Mid / Long	0.02633	1	2.8	10.17
(P+T)	Rare Diseases	8	Ceroid lipofuscinosis neuronal 6	Nervous system disease	84	Neurodegenerative disease	28	Ceroid lipofuscinosis neuronal 6	19	Mid / Long / Genetic	8.039e-34	2.255e-31	5.52	420.68
(I)	GWAS Catalog	8	Survival in sporadic amyotrophic lateral sclerosis	Nervous system disease	84	Neurodegenerative disease	28	Motor neuron atrophy- Amyotrophic lateral sclerosis	1	Mid / Long	0.0803	1	12.05	30.39
(I+P+T)	Rare Diseases	8	Tay Sachs disease	Nervous system disease	84	Neurodegenerative disease	28	Tay Sachs disease	4	Short / Mid / Long	3.146e-31	8.826e-29	4.68	328.74
(T-1)	Rare Diseases	8	Tick-borne encephalitis	Nervous system disease	84	Brain - Viral encephalitis	12	Tick-borne encephalitis	1	Short / Mid	3.052e-40	8.56e-38	35.23	3205.25
(B)	PheWeb	8	Facial nerve disorders [CN7]	Nervous system disease	84	Facial nerve disorders	1	Facial nerve disorders [CN7]	1	Mid / Long	0.00465	1	4.47	24.03
(I)	PheWeb	8	Cervical radiculitis	Nervous system disease	84	Spinal nerve disease	7	Cervical radiculitis	5	Short / Mid / Long	0.02828	1	7.53	26.85
(T-2)	Rare Diseases	9	Ceroid lipofuscinosis neuronal 6	Nervous system disease	84	Neurodegenerative disease	28	Ceroid lipofuscinosis neuronal 6	19	Mid / Long / Genetic	1.156e-36	2.881e-34	6.38	527.85
(I+P+T)	Rare Diseases	9	Ceroid lipofuscinosis neuronal 6	Nervous system disease	84	Neurodegenerative disease	28	Ceroid lipofuscinosis neuronal 6	19	Mid / Long / Genetic	2.232e-30	5.566e-28	4.62	315.25
(T-1)	Rare Diseases	9	Japanese encephalitis	Nervous system disease	84	Brain - Viral encephalitis	12	Japanese encephalitis	1	Short / Mid	1.115e-36	2.779e-34	32.95	2728.12
(T-2)	DisGeNET	10	Meningitis	Nervous system disease	84	Brain - Meningitis	6	Meningitis	3	Short / Mid / Long	5.055e-08	0.0002484	4.12	69.28
(T-2)	GWAS Catalog	10	Moyamoya disease	Nervous system disease	84	Brain disease	10	Moyamoya disease	2	Mid / Long	0.006828	0.6589	5	24.95
(I+P+T+B)	Rare Diseases	10	California encephalitis	Nervous system disease	84	Brain - Viral encephalitis	12	California encephalitis	4	Short / Mid	3.775e-29	8.47e-27	3.76	246.08
(P)	PheWeb	10	Nerve plexus lesions	Nervous system disease	84	Nerve plexus lesions	1	Nerve plexus lesions	1	Mid / Long	0.09113	1	10.5	25.16
(P+T)	PheWeb	10	Cervical radiculitis	Nervous system disease	84	Spinal nerve disease	7	Cervical radiculitis	5	Short / Mid / Long	0.0767	1	2.96	7.59
(T-2)	Rare Diseases	11	Ceroid lipofuscinosis neuronal 1	Nervous system disease	84	Neurodegenerative disease	28	Ceroid lipofuscinosis neuronal 1	19	Mid / Long / Genetic	1.051e-34	2.145e-32	6.19	484.4
(B)	Rare Diseases	11	Ceroid lipofuscinosis neuronal 9	Nervous system disease	84	Neurodegenerative disease	28	Ceroid lipofuscinosis neuronal 9	19	Mid / Long / Genetic	7.831e-11	1.598e-08	4.03	93.71
(I)	OMIM Expanded	11	parkinson disease	Nervous system disease	84	Neurodegenerative disease	28	Parkinson disease	2	Mid / Long	0.02467	0.4193	3.04	11.26
(P)	OMIM Expanded	11	adrenoleukodystrophy	Nervous system disease	84	Brain disease	10	Adrenoleukodystrophy	2	Congenital / Genetic	0.01903	0.3236	5.32	21.06
(B)	DisGeNET	11	Cerebral Ischemia	Nervous system disease	84	Brain disease	10	Cerebral Ischemia	1	Short / Mid / Long	3.969e-60	4.063e-58	8.79	1201.7
(I)	DisGeNET	11	Pontocerebellar Hypoplasia Type 1	Nervous system disease	84	Brain disease	10	Pontocerebellar Hypoplasia Type 1	1	Congenital / Genetic	0.00546	0.6388	17.21	89.68
(I+P+T)	Rare Diseases	11	California encephalitis	Nervous system disease	84	Brain - Viral encephalitis	12	California encephalitis	4	Short / Mid	1.549e-29	3.16e-27	4.55	302.11
(P)	PheWeb	11	Other allied disorders of spine	Nervous system disease	84	Spinal nerve disease	7	Other allied disorders of spine	2	Mid / Long	0.09732	1	9.8	22.84
(I+P+T)	Rare Diseases	12	Ceroid lipofuscinosis neuronal 5	Nervous system disease	84	Neurodegenerative disease	28	Ceroid lipofuscinosis neuronal 5	19	Mid / Long / Genetic	1.549e-29	2.897e-27	4.55	302.11
(I+P+T+B)	Rare Diseases	12	Tay Sachs disease	Nervous system disease	84	Neurodegenerative disease	28	Tay Sachs disease	4	Short / Mid / Long	3.775e-29	7.058e-27	3.76	246.08
(P+T)	DisGeNET	12	Meningitis	Nervous system disease	84	Brain - Meningitis	6	Meningitis	3	Short / Mid / Long	1.404e-09	6.573e-07	4.16	84.79
(T-2)	Rare Diseases	12	California encephalitis	Nervous system disease	84	Brain - Viral encephalitis	12	California encephalitis	4	Short / Mid	9.682e-34	1.811e-31	6.1	463.52
(P+T)	Rare Diseases	13	Ceroid lipofuscinosis neuronal 1	Nervous system disease	84	Neurodegenerative disease	28	Ceroid lipofuscinosis neuronal 1	19	Mid / Long / Genetic	5.435e-32	9.382e-30	5.36	386.07
(I+P+T)	Rare Diseases	13	Ceroid lipofuscinosis neuronal 1	Nervous system disease	84	Neurodegenerative disease	28	Ceroid lipofuscinosis neuronal 1	19	Mid / Long / Genetic	1.051e-28	1.815e-26	4.49	289.31
(I+P+T+B)	Rare Diseases	13	Ceroid lipofuscinosis neuronal 1	Nervous system disease	84	Neurodegenerative disease	28	Ceroid lipofuscinosis neuronal 1	19	Mid / Long / Genetic	2.233e-28	3.855e-26	3.72	236.55
(T-2)	Rare Diseases	13	Ceroid lipofuscinosis neuronal 3	Nervous system disease	84	Neurodegenerative disease	28	Ceroid lipofuscinosis neuronal 3	19	Mid / Long / Genetic	8.708e-33	1.503e-30	6	443.2
(T-1)	Rare Diseases	13	Dancing eyes-dancing feet syndrome	Nervous system disease	84	Ataxia	6	Dancing feet syndrome	3	Mid / Long	3.248e-33	5.606e-31	30.68	2295.23
(I)	GWAS Catalog	13	Otitis media	Nervous system disease	84	Auditory system disease	3	Otitis media	3	Short	0.09557	1	10.04	23.57
(I)	GWAS Catalog	14	Otitis media (chronic)	Nervous system disease	84	Auditory system disease	3	Otitis media (chronic)	3	Short	0.09557	1	10.04	23.57
(B)	DisGeNET	14	Cerebral Infarction	Nervous system disease	84	Brain disease	10	Cerebral Infarction (stroke)	1	Short / Mid / Long	4.955e-60	4.969e-58	8.63	1178.79
(I+P+T+B)	Rare Diseases	15	Ceroid lipofuscinosis neuronal 3	Nervous system disease	84	Neurodegenerative disease	28	Ceroid lipofuscinosis neuronal 3	19	Mid / Long / Genetic	1.294e-27	1.936e-25	3.67	227.25
(I)	GEO up	15	Huntington's disease DOID-12858 mouse GSE3248 sample 726	Nervous system disease	84	Neurodegenerative disease	28	Huntington disease	1	Mid / Long	0.0005249	0.03146	2.59	19.57
(B)	GEO up	15	Neurological pain disorder C0423704 rat GSE18803 sample 212	Nervous system disease	84	Neurological pain	1	Neurological pain disorder	1	Mid / Long	1.029e-10	6.168e-09	2.94	67.6
(I)	GWAS Catalog	15	Otitis media (recurrent)	Nervous system disease	84	Auditory system disease	3	Otitis media (chronic)	3	Short	0.09557	1	10.04	23.57
(I+P+T)	DisGeNET	15	Meningitis	Nervous system disease	84	Brain - Meningitis	6	Meningitis	3	Short / Mid / Long	1.001e-07	4.278e-05	3.34	53.77
(B)	Rare Diseases	15	Periventricular leukomalacia	Nervous system disease	84	Brain disease	10	Periventricular leukomalacia	1	Mid / Long	7.831e-11	1.172e-08	4.03	93.71
(P+T)	Rare Diseases	15	California encephalitis	Nervous system disease	84	Brain - Viral encephalitis	12	California encephalitis	4	Short / Mid	3.353e-30	5.016e-28	5.21	353.25
(P+T)	Rare Diseases	16	Ceroid lipofuscinosis neuronal 3	Nervous system disease	84	Neurodegenerative disease	28	Ceroid lipofuscinosis neuronal 3	19	Mid / Long / Genetic	3.353e-30	4.702e-28	5.21	353.25
(I+P+T)	Rare Diseases	16	Ceroid lipofuscinosis neuronal 3	Nervous system disease	84	Neurodegenerative disease	28	Ceroid lipofuscinosis neuronal 3	19	Mid / Long / Genetic	4.529e-27	6.352e-25	4.36	264.74
(I)	GEO up	16	cerebral palsy DOID-1969 human GSE31243 sample 878	Nervous system disease	84	Brain disease	10	Cerebral palsy	1	Short / Mid / Long	0.0007689	0.03795	2.7	19.38
(P+T)	GWAS Catalog	16	Moyamoya disease	Nervous system disease	84	Brain disease	10	Moyamoya disease	2	Mid / Long	0.01249	0.986	4.21	18.44
(T-1)	PheWeb	16	Other paralytic syndromes	Nervous system disease	84	Paralytic syndromes	1	Other paralytic syndromes	1	Short / Mid / Long	0.05989	1	16.23	45.7
(P)	PheWeb	16	Cervical radiculitis	Nervous system disease	84	Spinal nerve disease	7	Cervical radiculitis	5	Short / Mid / Long	0.1035	1	9.19	20.85
(T-2)	Rare Diseases	17	Ceroid lipofuscinosis neuronal 2	Nervous system disease	84	Neurodegenerative disease	28	Ceroid lipofuscinosis neuronal 2	19	Mid / Long / Genetic	6.559e-31	8.658e-29	5.82	404.22
(I+P+T+B)	Rare Diseases	17	Dancing eyes-dancing feet syndrome	Nervous system disease	84	Ataxia	6	Dancing feet syndrome	3	Mid / Long	1.294e-27	1.708e-25	3.67	227.25
(P+T)	OMIM Expanded	17	episodic ataxia	Nervous system disease	84	Ataxia	6	Episodic ataxia	2	Mid / Long	0.07935	0.781	1.71	4.33
(I)	OMIM Expanded	17	adrenoleukodystrophy	Nervous system disease	84	Brain disease	10	Adrenoleukodystrophy	2	Congenital / Genetic	0.04939	0.5131	2.9	8.73
(B)	Rare Diseases	17	Canavan disease	Nervous system disease	84	Brain disease	10	Canavan disease	1	Congenital / Genetic	3.7e-10	4.884e-08	3.89	84.54
(T-2)	OMIM Expanded	18	episodic ataxia	Nervous system disease	84	Ataxia	6	Episodic ataxia	2	Mid / Long	0.2811	1	1.36	1.72
(I+P+T)	OMIM Expanded	19	parkinson disease	Nervous system disease	84	Neurodegenerative disease	28	Parkinson disease	2	Mid / Long	0.01082	0.119	1.92	8.68
(T-1)	GWAS Catalog	19	Febrile seizures (MMR vaccine-related)	Nervous system disease	84	Seizures	2	Febrile seizures	2	Short	0.03467	1	28.41	95.51
(P+T+I+B)	TopFun	2	Asthma	Respiratory system disease	48	Asthma	18	Asthma	18	Mid / Long	1.39e-94
(T-1)	OMIM Expanded	3	asthma	Respiratory system disease	48	Asthma	18	Asthma	18	Mid / Long	0.07059	1	4.59	12.17
(P)	GWAS Catalog	3	Pulmonary artery enlargement and chronic obstructive pulmonary disease	Respiratory system disease	48	Pulmonary Sarcoidosis/Fibrosis	7	pulmonary sarcoidosis and COPD	7	Short / Mid / Long	0.03354	1	29.41	99.85
(B)	DisGeNET	4	Pneumonia	Respiratory system disease	48	Pneumonia	5	Pneumonia	5	Short	2.037e-83	6.904e-81	7.51	1429.57
(B)	GEO up	4	pulmonary sarcoidosis DOID-13406 human GSE19976 sample 764	Respiratory system disease	48	Pulmonary Sarcoidosis/Fibrosis	7	Pulmonary sarcoidosis/fibrosis	7	Short / Mid / Long	5.341e-13	2.24e-10	3.48	98.46
(P+T)	OMIM Expanded	5	asthma	Respiratory system disease	48	Asthma	18	Asthma	18	Mid / Long	0.02259	1	1.91	7.25
(P)	GEO up	6	Asthma, allergic C0155877 human GSE3004 sample 360	Respiratory system disease	48	Asthma	18	Asthma	18	Mid / Long	1.788e-23	7.501e-21	11.52	603.34
(T-2)	TopFun	6	Asthma	Respiratory system disease	48	Asthma	18	Asthma	18	Mid / Long	1.44e-13
(B)	TopFun	6	Chronic Obstructive Airway Disease	Respiratory system disease	48	COPD	10	Chronic Obstructive Airway Disease	9	Mid / Long	1.813e-126
(I)	TopGene	6	Chronic Obstructive Airway Disease	Respiratory system disease	48	COPD	10	Chronic Obstructive Airway Disease	9	Mid / Long	1.813e-126
(T-1)	TopGene	6	Chronic Obstructive Airway Disease	Respiratory system disease	48	COPD	10	Chronic Obstructive Airway Disease	9	Mid / Long	1.813e-126
(P+T)	TopGene	6	Chronic Obstructive Airway Disease	Respiratory system disease	48	COPD	10	Chronic Obstructive Airway Disease	9	Mid / Long	1.813e-126
(P+T+I)	TopGene	6	Chronic Obstructive Airway Disease	Respiratory system disease	48	COPD	10	Chronic Obstructive Airway Disease	9	Mid / Long	1.813e-126
(P)	TopGene	6	Chronic Obstructive Airway Disease	Respiratory system disease	48	COPD	10	Chronic Obstructive Airway Disease	9	Mid / Long	1.813e-126
(T-2)	TopGene	6	Chronic Obstructive Airway Disease	Respiratory system disease	48	COPD	10	Chronic Obstructive Airway Disease	9	Mid / Long	1.813e-126
(B)	DisGeNET	6	Pneumonitis	Respiratory system disease	48	Pneumonia	5	Pneumonitis	5	Short	8.913e-70	1.307e-67	8.47	1347.22
(B)	GWAS Catalog	7	Pneumonia	Respiratory system disease	48	Pneumonia	5	Pneumonia	5	Short	0.0001186	0.009363	13.42	121.34
(I+P+T)	OMIM Expanded	8	asthma	Respiratory system disease	48	Asthma	18	Asthma	18	Mid / Long	0.004626	0.1081	2.04	10.99
(B)	TopFun	8	Asthma	Respiratory system disease	48	Asthma	18	Asthma	18	Mid / Long	3.787e-125
(I)	TopGene	8	Asthma	Respiratory system disease	48	Asthma	18	Asthma	18	Mid / Long	3.787e-125
(T-1)	TopGene	8	Asthma	Respiratory system disease	48	Asthma	18	Asthma	18	Mid / Long	3.787e-125
(P+T)	TopGene	8	Asthma	Respiratory system disease	48	Asthma	18	Asthma	18	Mid / Long	3.787e-125
(P+T+I)	TopGene	8	Asthma	Respiratory system disease	48	Asthma	18	Asthma	18	Mid / Long	3.787e-125
(P)	TopGene	8	Asthma	Respiratory system disease	48	Asthma	18	Asthma	18	Mid / Long	3.787e-125
(T-2)	TopGene	8	Asthma	Respiratory system disease	48	Asthma	18	Asthma	18	Mid / Long	3.787e-125
(T-1)	DisGeNET	8	Fetid chronic bronchitis	Respiratory system disease	48	Bronchitis	1	Bronchitis (Fetid chronic)	1	Short / Mid / Long	0.0003962	0.06832	64.94	508.67
(I)	GEO up	8	COPD - Chronic obstructive pulmonary disease C0024117 human GSE3212 sample 196	Respiratory system disease	48	COPD	10	COPD	9	Mid / Long	4.383e-05	0.005253	2.86	28.72
(B)	GEO up	8	Acute Lung Injury C0242488 mouse GSE1871 sample 152	Respiratory system disease	48	Lung Injury	2	Lung Injury (Acute)	2	Short / Mid / Long	3.484e-12	5.847e-10	3.25	85.68
(I+P+T+B)	OMIM Expanded	10	asthma	Respiratory system disease	48	Asthma	18	Asthma	18	Mid / Long	1.438e-08	3.362e-07	2.89	52.25
(B)	Rare Diseases	10	Berylliosis	Respiratory system disease	48	Berylliosis	1	Berylliosis	1	Short / Mid / Long	7.831e-11	1.757e-08	4.03	93.71
(B)	DisGeNET	10	Cystic Fibrosis	Respiratory system disease	48	Cystic fibrosis	2	Cystic fibrosis	2	Congenital / Genetic	2.6e-81	7.097e-79	6.69	1241.14
(P+T+I+B)	TopFun	12	Chronic Obstructive Airway Disease	Respiratory system disease	48	COPD	10	Chronic Obstructive Airway Disease	9	Mid / Long	5.43e-86
(P+T)	TopFun	14	Asthma	Respiratory system disease	48	Asthma	18	Asthma	18	Mid / Long	4.123e-17
(P+T+I)	TopFun	14	Asthma	Respiratory system disease	48	Asthma	18	Asthma	18	Mid / Long	4.963e-14
(I+P+T+B)	GEO up	14	pulmonary sarcoidosis DOID-13406 human GSE19976 sample 764	Respiratory system disease	48	Pulmonary Sarcoidosis/Fibrosis	7	Pulmonary sarcoidosis	7	Short / Mid / Long	4.689e-28	3.026e-26	2.98	187.79
(T-2)	GEO up	16	pulmonary sarcoidosis DOID-13406 human GSE19976 sample 764	Respiratory system disease	48	Pulmonary sarcoidosis/fibrosis/Fibrosis	7	Pulmonary sarcoidosis/fibrosis	7	Short / Mid / Long	1.34e-26	6.613e-25	4.15	247.28
(T-1)	PheWeb	17	Acute laryngitis and tracheitis	Respiratory system disease	48	Acute laryngitis	1	Acute laryngitis and tracheitis	1	Mid / Long	0.06815	1	14.2	38.15
(I)	GEO up	17	Lung Injury C0273115 human GSE1541 sample 67	Respiratory system disease	48	Lung Injury	2	Lung Injury	2	Short / Mid / Long	0.001162	0.04641	2.85	19.23
(T-2)	DisGeNET	18	Acute asthma	Respiratory system disease	48	Asthma	18	Asthma (Acute)	18	Mid / Long	0.0003828	0.03389	7.22	56.78
(P)	OMIM Expanded	18	central hypoventilation syndrome	Respiratory system disease	48	COPD	10	Central hypoventilation syndrome	1	Mid / Long	0.01903	0.1977	5.32	21.06
(B)	PheWeb	18	Cystic fibrosis	Respiratory system disease	48	Cystic fibrosis	2	Cystic fibrosis	2	Congenital / Genetic	0.01921	1	3.84	15.16
(B)	Rare Diseases	18	Coal worker's pneumoconiosis	Respiratory system disease	48	Pneumonia	5	Pneumoconiosis	5	Mid / Long	3.7e-10	4.613e-08	3.89	84.54
(I+P+T+B)	GWAS Catalog	19	Pneumonia	Respiratory system disease	48	Pneumonia	5	Pneumonia	5	Short	0.007498	0.2894	4.48	21.9
(P+T)	GEO up	19	pulmonary sarcoidosis/fibrosis DOID-13406 human GSE19976 sample 764	Respiratory system disease	48	Pulmonary Sarcoidosis	7	Pulmonary sarcoidosis	7	Short / Mid / Long	2.14e-27	1.056e-25	3.86	237.15
(I+P+T+B)	PheWeb	19	Acute sinusitis	Respiratory system disease	48	Sinusitis	1	Sinusitis	1	Short	0.06222	1	2.56	7.1
(T-1)	GEO up	20	allergic asthma DOID-9415 human GSE41649 sample 716	Respiratory system disease	48	Asthma	18	Asthma (Allergic)	18	Mid / Long	2.402e-24	9.16e-23	17.27	939.24
(I+P+T)	GEO up	20	pulmonary sarcoidosis DOID-13406 human GSE19976 sample 764	Respiratory system disease	48	Pulmonary Sarcoidosis	7	Pulmonary sarcoidosis	7	Short / Mid / Long	4.655e-21	2.17e-19	3.1	145
(B)	DisGeNET	20	Sarcoidosis, Pulmonary	Respiratory system disease	48	Pulmonary Sarcoidosis	7	Pulmonary sarcoidosis	7	Short / Mid / Long	2.057e-30	5.827e-29	16.92	1156.89
(T-1)	GWAS Catalog	1	Response to fenofibrate (adiponectin levels)	Response to drug	8	Response to drug	8	Response to fenofibrate (adiponectin levels)	1	Short / Mid / Long	6.403e-05	0.1112	37.88	365.76
(I)	GWAS Catalog	5	Response to antineoplastic agents	Response to drug	8	Response to drug	8	Response to antineoplastic agents	1	Short / Mid / Long	0.0803	1	12.05	30.39
(T-1)	PheWeb	7	Opiates and related narcotics causing adverse effects in therapeutic use	Response to drug	8	Response to drug	8	Opiates and related narcotics causing adverse effects in therapeutic use	1	Short / Mid / Long	0.03892	1	25.25	81.98
(I)	GWAS Catalog	7	Response to methylphenidate treatment in ADHD (blood pressure)	Response to drug	8	Response to drug	8	Response to methylphenidate treatment in ADHD (blood pressure)	1	Short / Mid / Long	0.0803	1	12.05	30.39
(T-1)	GWAS Catalog	9	Remission after SSRI treatment in MDD or openness	Response to drug	8	Response to drug	8	Remission after SSRI treatment in MDD or openness	1	Short / Mid / Long	0.02611	1	37.88	138.08
(I)	GWAS Catalog	17	Cisplatin-induced ototoxicity	Response to drug	8	Response to drug	8	Cisplatin-induced ototoxicity	1	Short / Mid / Long	0.09557	1	10.04	23.57
(T-1)	GWAS Catalog	20	Response to antipsychotic treatment in schizophrenia (working memory)	Response to drug	8	Response to drug	8	Response to antipsychotic treatment in schizophrenia (working memory)	1	Short / Mid / Long	0.03892	1	25.25	81.98
(P)	GWAS Catalog	20	Response to tocilizumab in rheumatoid arthritis	Response to drug	8	Response to drug	8	Response to tocilizumab in rheumatoid arthritis	1	Short / Mid / Long	0.05313	1	18.38	53.95
(T-2)	GEO up	6	Septic Shock C0036983 human GSE9692 sample 307	Sepsis	15	Sepsis / Septicemia / Septic Shock	15	Septic Shock	4	Short	5.165e-55	8.667e-53	4.94	617.16
(P+T)	GEO up	6	Septic Shock C0036983 human GSE9692 sample 307	Sepsis	15	Sepsis / Septicemia / Septic Shock	15	Septic Shock	4	Short	5.493e-51	7.681e-49	4.34	502.53
(I+P+T)	GEO up	8	Septic Shock C0036983 human GSE9692 sample 307	Sepsis	15	Sepsis / Septicemia / Septic Shock	15	Septic Shock	4	Short	2.821e-41	3.381e-39	3.53	329.95
(I+P+T+B)	GEO up	8	Septic Shock C0036983 human GSE9692 sample 307	Sepsis	15	Sepsis / Septicemia / Septic Shock	15	Septic Shock	4	Short	9.998e-41	1.398e-38	2.99	275.41
(P+T+I+B)	TopFun	11	Sepsis	Sepsis	15	Sepsis / Septicemia / Septic Shock	15	Sepsis	2	Short	3.63e-86
(T-2)	TopFun	12	Sepsis	Sepsis	15	Sepsis / Septicemia / Septic Shock	15	Sepsis	2	Short	1.3e-11
(T-2)	TopFun	13	Septicemia	Sepsis	15	Sepsis / Septicemia / Septic Shock	15	Septicemia	9	Short	1.89e-11
(P+T+I+B)	TopFun	13	Septicemia	Sepsis	15	Sepsis / Septicemia / Septic Shock	15	Septicemia	9	Short	9.19e-86
(B)	TopFun	20	Septicemia	Sepsis	15	Sepsis / Septicemia / Septic Shock	15	Septicemia	9	Short	8.898e-118
(I)	TopGene	20	Septicemia	Sepsis	15	Sepsis / Septicemia / Septic Shock	15	Septicemia	9	Short	8.898e-118
(T-1)	TopGene	20	Septicemia	Sepsis	15	Sepsis / Septicemia / Septic Shock	15	Septicemia	9	Short	8.898e-118
(P+T)	TopGene	20	Septicemia	Sepsis	15	Sepsis / Septicemia / Septic Shock	15	Septicemia	9	Short	8.898e-118
(P+T+I)	TopGene	20	Septicemia	Sepsis	15	Sepsis / Septicemia / Septic Shock	15	Septicemia	9	Short	8.898e-118
(P)	TopGene	20	Septicemia	Sepsis	15	Sepsis / Septicemia / Septic Shock	15	Septicemia	9	Short	8.898e-118
(T-2)	TopGene	20	Septicemia	Sepsis	15	Sepsis / Septicemia / Septic Shock	15	Septicemia	9	Short	8.898e-118
(I)	OMIM Expanded	1	cutis laxa	Skin disease	24	Loose/ wrinkling	5	Cutis laxa	4	Mid / Long	0.002745	0.5134	4.3	25.38
(B)	GWAS Catalog	1	Plantar warts	Skin disease	24	Skin thickening/ growth	10	Plantar warts	2	Short / Mid / Long	1.053e-08	6.097e-06	18.79	345.19
(I+P+T+B)	GWAS Catalog	1	Plantar warts	Skin disease	24	Skin thickening/ growth	10	Plantar warts	2	Short / Mid / Long	1.899e-05	0.01649	6.27	68.13
(B)	Rare Diseases	1	Papillon Lefevre syndrome	Skin disease	24	Skin thickening/ growth	10	Papillon Lefevre syndrome	2	Mid / Long / Genetic	1.875e-14	4.208e-11	4.7	148.49
(P)	DisGeNET	2	Oculocutaneous albinism type 1	Skin disease	24	Pigmentation	2	Oculocutaneous albinism type 1	1	Short / Mid / Long / Genetic	3.564e-05	0.002994	44.12	451.86
(P)	OMIM Expanded	6	epidermolysis bullosa	Skin disease	24	Fragile skin/ blister	4	Dystrophic epidermolysis bullosa	2	Short / Mid / Long	0.003327	0.1037	6.54	37.29
(I)	DisGeNET	8	Cutis laxa, x-linked	Skin disease	24	Loose/ wrinkling	5	Cutis laxa, x-linked	4	Short / Mid / Long / Genetic	0.00546	0.6625	17.21	89.68
(T-2)	OMIM Expanded	8	ichthyosis	Skin disease	24	Skin thickening/ growth	10	Lchthyosis	3	Short / Mid	0.1282	1	1.6	3.28
(I+P+T)	OMIM Expanded	10	cutis laxa	Skin disease	24	Loose/ wrinkling	5	Cutis laxa	4	Mid / Long	0.005906	0.1004	2.11	10.82
(P+T)	OMIM Expanded	10	ichthyosis	Skin disease	24	Skin thickening/ growth	10	Lchthyosis	3	Short / Mid	0.03541	0.6622	1.85	6.17
(I+P+T+B)	OMIM Expanded	13	keratosis	Skin disease	24	Skin thickening/ growth	10	Keratosis	2	Short / Mid / Long	4.012e-08	5.771e-07	3.02	51.44
(P)	Rare Diseases	14	Geroderma osteodysplasticum	Skin disease	24	Loose/ wrinkling	5	Geroderma osteodysplasticum (skin wrinkling)	1	Mid / Long	3.278e-14	5.254e-12	12.5	388.11
(P)	GEO up	14	Eczema C0013595 human GSE6012 sample 268	Skin disease	24	Skin thickening/ growth	10	Eczema	1	Short / Mid / Long	1.096e-20	9.198e-19	9.76	448.52
(I+P+T)	OMIM Expanded	14	ichthyosis	Skin disease	24	Skin thickening/ growth	10	Lchthyosis	3	Short / Mid	0.006749	0.09708	2.02	10.09
(B)	GWAS Catalog	15	Shingles	Skin disease	24	Fragile skin/ blister	4	Shingles (Blister)	1	Short	0.000107	0.009294	9.59	87.66
(I)	Rare Diseases	16	Dystrophic epidermolysis bullosa	Skin disease	24	Fragile skin/ blister	4	Dystrophic epidermolysis bullosa	2	Short / Mid / Long	6.749e-06	0.0009466	4.22	50.21
(B)	OMIM Expanded	16	keratosis	Skin disease	24	Skin thickening/ growth	10	Keratosis	2	Short / Mid / Long	8.712e-09	8.146e-08	5.5	102.04
(I+P+T)	PheWeb	17	Candidiasis of skin and nails	Skin disease	24	Fungal infection	1	Candidiasis	1	Short	0.06806	1	2.53	6.8
(I+P+T)	DisGeNET	17	Cutis laxa, x-linked	Skin disease	24	Loose/ wrinkling	5	Cutis laxa, x-linked	4	Short / Mid / Long / Genetic	0.001121	0.04253	7.23	49.11
(I+P+T+B)	Rare Diseases	18	Papillon Lefevre syndrome	Skin disease	24	Skin thickening/ growth	10	Papillon Lefevre syndrome	2	Mid / Long / Genetic	1.294e-27	1.613e-25	3.67	227.25
(I+P+T)	PheWeb	19	Cellulitis and abscess of fingers/toes	Skin disease	24	Cellulitis	2	Cellulitis and abscess of fingers/toes	2	Short / Mid / Long	0.09313	1	2.71	6.43
(B)	PheWeb	20	Superficial cellulitis and abscess	Skin disease	24	Cellulitis	2	Superficial cellulitis and abscess	2	Short / Mid	0.03197	1	4.24	14.59
(T-1)	Rare Diseases	20	Lichen sclerosis	Skin disease	24	Fragile skin/ blister	4	Lichen sclerosis	1	Short / Mid / Long	3.286e-28	3.687e-26	27.27	1725.89
(P)	OMIM Expanded	20	Dyskeratosis	Skin disease	24	Pigmentation	2	Dyskeratosis	1	Short / Mid / Long / Genetic	0.01903	0.178	5.32	21.06
(P+T+I+B)	TopFun	19	Immunosuppression	Therapeutics	1	Therapeutics	1	Immunosuppression	1	Short / Mid / Long	7.04e-84
(T-1)	PheWeb	6	Acute renal failure	Urinary System Disease	30	Kidney Disease	28	Renal failure (Acute)	2	Mid / Long	0.004175	0.808	20.66	113.19
(I+P+T+B)	DisGeNET	8	Diabetic Nephropathy	Urinary System Disease	30	Kidney Disease	28	Diabetic Nephropathy	3	Mid / Long	3.833e-51	1.299e-48	3.11	361.25
(B)	DisGeNET	9	Glomerulonephritis	Urinary System Disease	30	Kidney Disease	28	Glomerulonephritis	5	Mid / Long	1.023e-55	8.671e-54	9.84	1246.36
(B)	GWAS Catalog	9	IgA nephropathy	Urinary System Disease	30	Kidney Disease	28	IGA Glomerulonephritis	5	Mid / Long	5.109e-07	0.0001775	7.46	108.03
(B)	TopFun	11	Kidney Diseases	Urinary System Disease	30	Kidney Disease	28	Kidney Diseases	13	Mid / Long	9.201e-122
(I)	TopGene	11	Kidney Diseases	Urinary System Disease	30	Kidney Disease	28	Kidney Diseases	13	Mid / Long	9.201e-122
(T-1)	TopGene	11	Kidney Diseases	Urinary System Disease	30	Kidney Disease	28	Kidney Diseases	13	Mid / Long	9.201e-122
(P+T)	TopGene	11	Kidney Diseases	Urinary System Disease	30	Kidney Disease	28	Kidney Diseases	13	Mid / Long	9.201e-122
(P+T+I)	TopGene	11	Kidney Diseases	Urinary System Disease	30	Kidney Disease	28	Kidney Diseases	13	Mid / Long	9.201e-122
(P)	TopGene	11	Kidney Diseases	Urinary System Disease	30	Kidney Disease	28	Kidney Diseases	13	Mid / Long	9.201e-122
(T-2)	TopGene	11	Kidney Diseases	Urinary System Disease	30	Kidney Disease	28	Kidney Diseases	13	Mid / Long	9.201e-122
(B)	DisGeNET	12	Diabetic Nephropathy	Urinary System Disease	30	Kidney Disease	28	Diabetic Nephropathy	3	Mid / Long	7.652e-78	1.6e-75	6.75	1198.1
(T-2)	TopFun	15	IGA Glomerulonephritis	Urinary System Disease	30	Kidney Disease	28	IGA Glomerulonephritis	5	Mid / Long	2.95e-11
(P)	GWAS Catalog	16	Diabetic kidney disease	Urinary System Disease	30	Kidney Disease	28	Diabetic kidney disease	3	Mid / Long	0.01149	1	12.25	54.74
(I+P+T)	DisGeNET	16	Distal Renal Tubular Acidosis	Urinary System Disease	30	Kidney Disease	28	Distal Renal Tubular Acidosis	1	Mid / Long	5.126e-05	0.004419	5.33	52.62
(B)	PheWeb	16	Other disorders of prostate	Urinary System Disease	30	Prostate Disease	1	Other disorders of prostate	1	Mid / Long	0.02767	1	4.47	16.05
(P)	OMIM Expanded	17	bartter syndrome	Urinary System Disease	30	Kidney Disease	28	Bartter syndrome (Electrolite imbalance)	1	Short / Mid	0.01903	0.2094	5.32	21.06
(P+T)	DisGeNET	17	IGA Glomerulonephritis	Urinary System Disease	30	Kidney Disease	28	IGA Glomerulonephritis	5	Mid / Long	3.545e-10	2.489e-07	2.86	62.27
(T-2)	PheWeb	18	Cyst of kidney, acquired	Urinary System Disease	30	Kidney Disease	28	Cyst of kidney, acquired	1	Mid / Long	0.07741	1	2.96	7.58
(I+P+T)	DisGeNET	18	IGA Glomerulonephritis	Urinary System Disease	30	Kidney Disease	28	IGA Glomerulonephritis	5	Mid / Long	3.467e-09	3.098e-06	2.51	48.87
(I)	PheWeb	18	Urethral hypermobility/ISD	Urinary System Disease	30	Urethral Disease	1	Urethral hypermobility	1	Short / Mid / Long	0.1254	1	7.53	15.64
(B)	TopFun	19	Chronic Kidney Diseases	Urinary System Disease	30	Kidney Disease	28	Kidney Disease (Chronic)	13	Mid / Long	6.263e-118
(I)	TopGene	19	Chronic Kidney Diseases	Urinary System Disease	30	Kidney Disease	28	Kidney Disease (Chronic)	13	Mid / Long	6.263e-118
(T-1)	TopGene	19	Chronic Kidney Diseases	Urinary System Disease	30	Kidney Disease	28	Kidney Disease (Chronic)	13	Mid / Long	6.263e-118
(P+T)	TopGene	19	Chronic Kidney Diseases	Urinary System Disease	30	Kidney Disease	28	Kidney Disease (Chronic)	13	Mid / Long	6.263e-118
(P+T+I)	TopGene	19	Chronic Kidney Diseases	Urinary System Disease	30	Kidney Disease	28	Kidney Disease (Chronic)	13	Mid / Long	6.263e-118
(P)	TopGene	19	Chronic Kidney Diseases	Urinary System Disease	30	Kidney Disease	28	Kidney Disease (Chronic)	13	Mid / Long	6.263e-118
(T-2)	TopGene	19	Chronic Kidney Diseases	Urinary System Disease	30	Kidney Disease	28	Kidney Disease (Chronic)	13	Mid / Long	6.263e-118
(P)	PheWeb	20	Renal failure NOS	Urinary System Disease	30	Kidney Disease	28	Renal failure NOS	2	Mid / Long	0.1096	1	8.65	19.13
(I+P+T+B)	Rare Diseases	20	Renal rickets	Urinary System Disease	30	Kidney Disease	28	Renal rickets	1	Mid / Long	1.294e-27	1.452e-25	3.67	227.25

## Sheet: C
Parent	Parent Count of occurrence	Child	Child Count of occurrence	Specific disease name	Specific disease Count of occurrence
Infectious disease	154	Viral	116	Hepatitis C	21
Infectious disease	154	Viral	116	Influenza	19
Infectious disease	154	Viral	116	Dengue	15
Infectious disease	154	Viral	116	HIV	8
Infectious disease	154	Viral	116	West Nile fever	5
Infectious disease	154	Viral	116	Enterovirus 71 infection	4
Infectious disease	154	Viral	116	Marburg hemorrhagic fever	4
Infectious disease	154	Viral	116	Viral Enteritis	3
Infectious disease	154	Viral	116	Respiratory syncytial virus (RSV) infection	6
Infectious disease	154	Viral	116	Hepatitis B virus infection/ susceptibility	3
Infectious disease	154	Viral	116	Chikungunya Fever	3
Infectious disease	154	Viral	116	Measles	3
Infectious disease	154	Viral	116	Parainfluenza / Parainfluenza virus type 3	4
Infectious disease	154	Viral	116	Rabies	2
Infectious disease	154	Viral	116	Rotavirus infection	2
Infectious disease	154	Viral	116	Mumps	2
Infectious disease	154	Viral	116	Sexually transmitted infections (not HIV or hepatitis)	2
Infectious disease	154	Viral	116	Poxviridae Infections	2
Infectious disease	154	Viral	116	Rhinovirus infection	2
Infectious disease	154	Viral	116	Zaire ebolavirus	1
Infectious disease	154	Viral	116	Zika Virus Infection	1
Infectious disease	154	Viral	116	Togaviridae disease	1
Infectious disease	154	Viral	116	Vesicular Stomatitis	1
Infectious disease	154	Viral	116	Coronavirus infectious - Severe acute respiratory syndrome (SARS)	1
Infectious disease	154	Viral	116	Sindbis virus infection	1
Infectious disease	154	Bacterial Infections and Mycoses	23	Tuberculosis / Mycobacterial infections (Recurrent)	15
Infectious disease	154	Bacterial Infections and Mycoses	23	Posttraumatic wound infection	2
Infectious disease	154	Bacterial Infections and Mycoses	23	Other bacterial Infections	2
Infectious disease	154	Bacterial Infections and Mycoses	23	Yersinia enterocolitica	1
Infectious disease	154	Bacterial Infections and Mycoses	23	Spotted fever	1
Infectious disease	154	Bacterial Infections and Mycoses	23	Clostridium sordellii	1
Infectious disease	154	Bacterial Infections and Mycoses	23	Melioidosis	1
Infectious disease	154	Parasitic protozoa	7	Malaria	6
Infectious disease	154	Parasitic protozoa	7	Protozoan Infection	1
Infectious disease	154	Parasitic flatworm	3	Schistosomiases	3
Infectious disease	154	Gastrointestinal disease	1	Infectious colitis	1
Neoplasm	135	Breast cancer	20	Breast cancer / Sporadic Breast cancer	20
Neoplasm	135	Gynecologic	19	Endometrial cancer	9
Neoplasm	135	Gynecologic	19	Cervical cancer	5
Neoplasm	135	Gynecologic	19	Ovarian cancer	5
Neoplasm	135	Liver cancer	17	Liver cancer	17
Neoplasm	135	Hematologic	15	Multiple myeloma	8
Neoplasm	135	Hematologic	15	Leukemia / CLL	4
Neoplasm	135	Hematologic	15	Lymphoma	2
Neoplasm	135	Hematologic	15	Myeloproliferative disease	1
Neoplasm	135	Nervous system	14	Nervous system Brain Neoplasms/Glioblastoma/Glioma	7
Neoplasm	135	Nervous system	14	Nervous system Anaplastic Oligoastrocytoma	2
Neoplasm	135	Nervous system	14	Neoplasm of uncertain behavior	1
Neoplasm	135	Nervous system	14	Nervous system Neurofibromatosis	1
Neoplasm	135	Nervous system	14	Nervous system Neuroma / Acoustic neuroma	1
Neoplasm	135	Head and neck cancer	11	Nasopharyngeal carcinoma	5
Neoplasm	135	Head and neck cancer	11	Larynx cancer	2
Neoplasm	135	Head and neck cancer	11	Esophagal cancer	1
Neoplasm	135	Head and neck cancer	11	Pharynx	1
Neoplasm	135	Head and neck cancer	11	Squamous cell carcinoma of mouth	1
Neoplasm	135	Head and neck cancer	11	Squamous cell carcinoma of the head and neck	1
Neoplasm	135	Gastric / Colon	9	Colorectal cancer	4
Neoplasm	135	Gastric / Colon	9	Rectosigmoid neoplasm	1
Neoplasm	135	Skin	8	Melanoma	4
Neoplasm	135	Skin	8	Angiokeratoma	1
Neoplasm	135	Skin	8	Cylindrocarcinoma	1
Neoplasm	135	Skin	8	Nevus (type of Skin cancer)	1
Neoplasm	135	Skin	8	Skin cancer (Secondary malignant neoplasm of skin)	1
Neoplasm	135	Adenoma/ Adenocarcinoma	5	Adenoma/ Adenocarcinoma	5
Neoplasm	135	Bone / Cartilage	5	Cartilaginous cancer/ Chondroma / Enchondroma	3
Neoplasm	135	Bone / Cartilage	5	Sarcoma / Fibrosarcoma	2
Neoplasm	135	Prostate cancer	5	Prostate cancer (early onset)	5
Neoplasm	135	Germ cell	4	Malignant germ cell tumor	4
Neoplasm	135	Lung cancer	1	Lung cancer	1
Neoplasm	135	Muir-Torre syndrome	1	Muir-Torre syndrome	1
Neoplasm	135	Pancreatic cancer	1	Pancreatic cancer	1
Neoplasm	135	Urothelial carcinoma	1	Urothelial carcinoma in situ	1
Abnormal sign or symptom	118	Blood	59	Reticulocyte fraction of red cells - High light scatter reticulocyte percentage of red cells	11
Abnormal sign or symptom	118	Blood	59	Circulating myeloperoxidase levels (serum)	4
Abnormal sign or symptom	118	Blood	59	Lipoprotein-associated phospholipase A2 activity and mass	5
Abnormal sign or symptom	118	Blood	59	Matrix metalloproteinase-8 levels	3
Abnormal sign or symptom	118	Blood	59	Plasma PCSK9 levels in stable coronary artery disease	3
Abnormal sign or symptom	118	Blood	59	Lipoprotein level	3
Abnormal sign or symptom	118	Blood	59	Abnormal erythrocyte morphology - Spherocytosis	3
Abnormal sign or symptom	118	Blood	59	Nonspecific findings on examination of blood	2
Abnormal sign or symptom	118	Blood	59	Total bilirubin levels	2
Abnormal sign or symptom	118	Blood	59	Plasma plasminogen activator levels	2
Abnormal sign or symptom	118	Blood	59	Liver enzyme levels	2
Abnormal sign or symptom	118	Blood	59	Hemoglobin levels	2
Abnormal sign or symptom	118	Blood	59	Plasma parathyroid hormone levels	2
Abnormal sign or symptom	118	Blood	59	Plasminogen activator inhibitor type 1 levels (PAI-1)	2
Abnormal sign or symptom	118	Blood	59	Amyloid A serum levels	1
Abnormal sign or symptom	118	Blood	59	Bone-marrow foam cells	1
Abnormal sign or symptom	118	Blood	59	Lactate dehydrogenase levels	1
Abnormal sign or symptom	118	Blood	59	Poisoning by agents primarily affecting blood constituents	1
Abnormal sign or symptom	118	Blood	59	Neutrophil count in HIV-infection	1
Abnormal sign or symptom	118	Blood	59	Vitamin E levels	1
Abnormal sign or symptom	118	Blood	59	D-dimer levels	1
Abnormal sign or symptom	118	Blood	59	Purpura, Idiopathic Thrombocytopenic	1
Abnormal sign or symptom	118	Blood	59	Beta-2 microglubulin plasma levels	1
Abnormal sign or symptom	118	Fever	10	Fever / Severe fever with thrombocytopenia syndrome	10
Abnormal sign or symptom	118	Other	10	Abnormal results of other function studies (bladder, pancreas, placenta, spleen, etc)	2
Abnormal sign or symptom	118	Other	10	Bone mineral density	2
Abnormal sign or symptom	118	Other	10	Tachycardia	1
Abnormal sign or symptom	118	Other	10	Chronic ulcer	1
Abnormal sign or symptom	118	Other	10	Blond vs. brown hair color	1
Abnormal sign or symptom	118	Other	10	Postnasal drip	1
Abnormal sign or symptom	118	Other	10	Flue like - Bubonic plague	1
Abnormal sign or symptom	118	Other	10	Disorders of cervical region	1
Abnormal sign or symptom	118	Pain	9	Pain / Possible neuropathic pain	9
Abnormal sign or symptom	118	Lung function	7	Painful respiration / Dyspnea / Dependence on respirator [Ventilator]	6
Abnormal sign or symptom	118	Lung function	7	Forced vital capacity	1
Abnormal sign or symptom	118	Throat	7	Epiglottitis	3
Abnormal sign or symptom	118	Throat	7	Throat pain / Strep throat / Cold sores	4
Abnormal sign or symptom	118	Fatigue	5	Transient alteration of awareness	4
Abnormal sign or symptom	118	Fatigue	5	Response to stress	1
Abnormal sign or symptom	118	Chest	4	Abnormal chest sounds and Nonspecific chest pain	4
Abnormal sign or symptom	118	Eye Disease	7	Conjunctivitis (Viral / Allergic)	5
Abnormal sign or symptom	118	Eye Disease	7	Keratitis	2
Abnormal sign or symptom	118	Mental health	4	Feeling tense / Anxiety disorder/ Tension headache	4
Cardiovascular System Disease	103	Vascular disease	53	Arteriosclerosis	12
Cardiovascular System Disease	103	Vascular disease	53	Cerebrovascular accident / Stroke	9
Cardiovascular System Disease	103	Vascular disease	53	Hypertensive disease	8
Cardiovascular System Disease	103	Vascular disease	53	Embolism / Thrombosis	7
Cardiovascular System Disease	103	Vascular disease	53	Carotid Atherosclerosis	6
Cardiovascular System Disease	103	Vascular disease	53	Aneurysm (Aortic/ Thoracic / Abdominal)	4
Cardiovascular System Disease	103	Vascular disease	53	Dural Arteriovenous Fistula	3
Cardiovascular System Disease	103	Vascular disease	53	Giant cell arteritis	2
Cardiovascular System Disease	103	Vascular disease	53	Peripheral angiopathy	1
Cardiovascular System Disease	103	Vascular disease	53	Vasospasm, Intracranial	1
Cardiovascular System Disease	103	Myocardial disorder	25	Myocardial infarction / Myocardial infarction (Early onset / Acute)	13
Cardiovascular System Disease	103	Myocardial disorder	25	Other cardiomyopathy	5
Cardiovascular System Disease	103	Myocardial disorder	25	Infectious myocarditis	4
Cardiovascular System Disease	103	Myocardial disorder	25	Arrhythmogenic right ventricular dysplasia	2
Cardiovascular System Disease	103	Myocardial disorder	25	Cardiac Hypertrophy	1
Cardiovascular System Disease	103	Cardiovascular Diseases	12	Other cardiovascular diseases	12
Cardiovascular System Disease	103	Cardiac channelopathy	6	Long QT Syndrome	4
Cardiovascular System Disease	103	Cardiac channelopathy	6	Short QT Syndrome	2
Cardiovascular System Disease	103	Electrical cardiac activity	4	Cardiac repolarization	1
Cardiovascular System Disease	103	Electrical cardiac activity	4	Global electrical heterogeneity phenotypes	1
Cardiovascular System Disease	103	Electrical cardiac activity	4	Cardiac pacemaker	1
Cardiovascular System Disease	103	Electrical cardiac activity	4	Cardiac defibrillator in situ	1
Cardiovascular System Disease	103	Pericardium disease	2	Pericarditis	2
Cardiovascular System Disease	103	Valve disease	1	Nonrheumatic mitral valve disorders	1
Immune System Disorder	86	Autoimmune disease	68	Lupus erythematosus (Syatematic)	29
Immune System Disorder	86	Autoimmune disease	68	Other autoimmune diseases	10
Immune System Disorder	86	Autoimmune disease	68	Lupus erythematosus (Discoid)	6
Immune System Disorder	86	Autoimmune disease of Skin	68	Psoriasis / Psoriasis vulgaris / Psoriasis and related disorders	5
Immune System Disorder	86	Autoimmune disease	68	Neuromyelitis optica	4
Immune System Disorder	86	Autoimmune disease	68	Multiple Sclerosis	4
Immune System Disorder	86	Autoimmune disease	68	Autoimmune enteropathy	1
Immune System Disorder	86	Autoimmune disease	68	Polymyalgia Rheumatica	1
Immune System Disorder	86	Autoimmune disease	68	Myasthenia gravis	1
Immune System Disorder	86	Autoimmune disease	68	Antisynthetase syndrome	1
Immune System Disorder	86	Autoimmune disease	68	Celiac disease	1
Immune System Disorder	86	Autoimmune disease	68	Polyglandular syndrome type 1	1
Immune System Disorder	86	Autoimmune disease	68	Polyglandular syndrome type 2	1
Immune System Disorder	86	Immunodeficiency	10	C1q Deficiency	8
Immune System Disorder	86	Immunodeficiency	10	Immunodeficiency	2
Immune System Disorder	86	Immunodeficiency	10	Simian Acquired Immune Deficiency Syndrome	1
Immune System Disorder	86	Hyperthyroidism	3	Graves' disease	3
Immune System Disorder	86	Lymphadenitis	1	Histiocytic Necrotizing Lymphadenitis	1
Immune System Disorder	86	Transplant rejection	1	Lung transplant rejection	1
Immune System Disorder	86	Lymphocyte syndrome	1	Bare lymphocyte syndrome	1
Immune System Disorder	86	Autoinflammatory disorder	1	Autoinflammatory disorder	1
Immune System Disorder	86	Lymphohistiocytosis	1	Hemophagocytic lymphohistiocytosis	1
Nervous system disease	84	Neurodegenerative disease	28	Ceroid lipofuscinosis neuronal	19
Nervous system disease	84	Neurodegenerative disease	28	Tay Sachs disease	4
Nervous system disease	84	Neurodegenerative disease	28	Parkinson disease	2
Nervous system disease	84	Neurodegenerative disease	28	Familial idiopathic basal ganglia calcification	1
Nervous system disease	84	Neurodegenerative disease	28	Motor neuron atrophy- Amyotrophic lateral sclerosis	1
Nervous system disease	84	Neurodegenerative disease	28	Huntington disease	1
Nervous system disease	84	Brain - Viral encephalitis	12	Nipah virus encephalitis	4
Nervous system disease	84	Brain - Viral encephalitis	12	California encephalitis	4
Nervous system disease	84	Brain - Viral encephalitis	12	Whole-brain volume (Alzheimer's disease interaction)	1
Nervous system disease	84	Brain - Viral encephalitis	12	West nile encephalitis	1
Nervous system disease	84	Brain - Viral encephalitis	12	Tick-borne encephalitis	1
Nervous system disease	84	Brain - Viral encephalitis	12	Japanese encephalitis	1
Nervous system disease	84	Other brain disease	10	Moyamoya disease	2
Nervous system disease	84	Other brain disease	10	Adrenoleukodystrophy	2
Nervous system disease	84	Other brain disease	10	Leukodystrophy	1
Nervous system disease	84	Other brain disease	10	Cerebral Ischemia	1
Nervous system disease	84	Other brain disease	10	Pontocerebellar Hypoplasia Type 1	1
Nervous system disease	84	Other brain disease	10	Cerebral Infarction (stroke)	1
Nervous system disease	84	Other brain disease	10	Periventricular leukomalacia	1
Nervous system disease	84	Other brain disease	10	Cerebral palsy	1
Nervous system disease	84	Other brain disease	10	Canavan disease	1
Nervous system disease	84	Spinal nerve disease	7	Cervical radiculitis	5
Nervous system disease	84	Spinal nerve disease	7	Other allied disorders of spine	2
Nervous system disease	84	Brain - Meningitis	6	Meningitis - Neonatal meningitis	3
Nervous system disease	84	Ataxia	6	Dancing feet syndrome	3
Nervous system disease	84	Ataxia	6	Episodic ataxia	2
Nervous system disease	84	Ataxia	6	Spinocerebellar ataxia type 17	1
Nervous system disease	84	Brain - Epilepsy	4	Unverricht-Lundborg disease	4
Nervous system disease	84	Auditory system disease	3	Otitis media	3
Nervous system disease	84	Seizures	2	Febrile seizures	2
Nervous system disease	84	Aicardi syndrome	1	Aicardi syndrome	1
Nervous system disease	84	Facial nerve disorders	1	Facial nerve disorders [CN7]	1
Nervous system disease	84	Nerve plexus lesions	1	Nerve plexus lesions	1
Nervous system disease	84	Neurological pain	1	Neurological pain disorder	1
Nervous system disease	84	Paralytic syndromes	1	Other paralytic syndromes	1
Musculoskeletal system disease	82	Bone inflammation disease	27	Arthritis / Rheumatoid Arthritis	19
Musculoskeletal system disease	82	Bone inflammation disease	27	Pigmented villonodular synovitis	4
Musculoskeletal system disease	82	Bone inflammation disease	27	Dermatomyositis	1
Musculoskeletal system disease	82	Bone inflammation disease	27	Arthritis - Felty's syndrome	1
Musculoskeletal system disease	82	Bone inflammation disease	27	Osteoarthritis	1
Musculoskeletal system disease	82	Bone inflammation disease	27	Gout and other crystal arthropathies	1
Musculoskeletal system disease	82	Myopathy	14	Dermatomyositis (Amyopathic / Childhood Type)	8
Musculoskeletal system disease	82	Myopathy	14	Myositis (Infectious / Focal)	4
Musculoskeletal system disease	82	Myopathy	14	Muscular dystrophy	2
Musculoskeletal system disease	82	Myopathy	14	Polymyositis, Idiopathic	1
Musculoskeletal system disease	82	Myopathy	14	Schwartz Jampel syndrome type 1	1
Musculoskeletal system disease	82	Myopathy	14	Polymyositis Ossificans	1
Musculoskeletal system disease	82	Myopathy	14	Nemaline myopathy	1
Musculoskeletal system disease	82	Bone degenerative disease	8	Degenerative polyarthritis	2
Musculoskeletal system disease	82	Bone development disease	9	Paget disease of bone familial	2
Musculoskeletal system disease	82	Bone development disease	9	Unequal leg length (acquired)	1
Musculoskeletal system disease	82	Bone development disease	9	Ulnar bowing	1
Musculoskeletal system disease	82	Bone development disease	9	Melnick-Needles syndrome	1
Musculoskeletal system disease	82	Bone degenerative disease	9	Bone necrosis	1
Musculoskeletal system disease	82	Bone development disease	9	Pseudoepiphyses of the metacarpals	1
Musculoskeletal system disease	82	Bone development disease	9	Fibrodysplasia ossificans progressiva	1
Musculoskeletal system disease	82	Bone development disease	9	Palmar fascia	1
Musculoskeletal system disease	82	Bone resorption disease	7	Osteoporosis	6
Musculoskeletal system disease	82	Bone resorption disease	7	Osteopenia	1
Musculoskeletal system disease	82	Bone fracture	5	Fracture of ribs	1
Musculoskeletal system disease	82	Bone fracture	5	Fracture of pelvis	1
Musculoskeletal system disease	82	Bone fracture	5	Fractures	1
Musculoskeletal system disease	82	Bone fracture	5	Fibrous dysplasia	1
Musculoskeletal system disease	82	Bone fracture	5	Fracture of femur	1
Musculoskeletal system disease	82	Scleroderma	4	CREST Syndrome	3
Musculoskeletal system disease	82	Scleroderma	4	Maffucci syndrome	1
Musculoskeletal system disease	82	Dystonic syndrome	3	Ceroid storage disease	3
Musculoskeletal system disease	82	Bone dysplasia	3	Polycystic lipomembranous osteodysplasia with sclerosing leukoencephalopathy	3
Musculoskeletal system disease	82	Connective Tissue Disorder	2	Hereditary Connective Tissue Disorder	1
Musculoskeletal system disease	82	Connective Tissue Disorder	2	Increased endomysial connective tissue	1
Musculoskeletal system disease	82	Spine disease	2	Schmorl's nodes	2
Musculoskeletal system disease	82	Hypertonia	1	Lower limb spasticity - spastic paraplegia	1
Musculoskeletal system disease	82	Hyperostosis	1	Sclerosteosis	1
Musculoskeletal system disease	82	Clayton-Smith Donnai syndrome	1	Clayton-Smith Donnai syndrome	1
Musculoskeletal system disease	82	Tendonitis	1	Contracture	1
Metabolic disorder	73	Diabetes	14	Diabetes type 1 / type 2	14
Metabolic disorder	73	Lysosomal storage disease	8	Gangliosidosis GM1 type 3	4
Metabolic disorder	73	Lysosomal storage disease	8	Sandhoff disease	4
Metabolic disorder	73	Cholesterol level	7	Cholesterol level/ Hypercholesterolemia/ Hyperlipidemia	7
Metabolic disorder	73	Metabolic Syndrome X	7	Metabolic Syndrome X	7
Metabolic disorder	73	Endocrine system disease	6	Secondary hyperparathyroidism of renal origin	4
Metabolic disorder	73	Endocrine system disease	6	Hypothyroidism	2
Metabolic disorder	73	Beta-galactosidase-1 deficiency	4	Beta-galactosidase-1 deficiency	4
Metabolic disorder	73	C-reactive protein	4	C-reactive protein	4
Metabolic disorder	73	Amyloidosis	4	Amyloidosis (Aquired)	4
Metabolic disorder	73	Glycemic trait	4	Hyperglycemia/Dysglycemia/ Disorder of glycosylation	4
Metabolic disorder	73	Protoporphyria	4	Protoporphyria / Erythropoietic protoporphyria (Inherited)	4
Metabolic disorder	73	Aspartylglucosaminuria	3	Aspartylglucosaminuria	3
Metabolic disorder	73	Insulin response	2	Corrected insulin response	2
Metabolic disorder	73	Obesity	2	Obesity	2
Metabolic disorder	73	Metabolic disorder	1	Alpha-1 anti-trypsin deficiency	1
Metabolic disorder	73	Plasminogen deficiency	1	Type 1 plasminogen deficiency	1
Metabolic disorder	73	Acidaemia	1	neuro-Gamma-hydroxybutyric acidaemia	1
Metabolic disorder	73	Decreased body weigh	1	Slender build	1
Mental disorder	57	Mood disorder	25	Depressed mood / Depressive disorder / Mental Depression	23
Mental disorder	57	Mood disorder	25	Bipolar disorder	2
Mental disorder	57	Other cognitive disorder	11	Language disorder - Aphasia	4
Mental disorder	57	Other cognitive disorder	11	Intellectual disability - Aicardi-Goutieres Syndrome/ Down syndrome/ Atkin syndrome	4
Mental disorder	57	Other cognitive disorder	11	Formal thought disorder in schizophrenia	1
Mental disorder	57	Other cognitive disorder	11	Memory performance	1
Mental disorder	57	Other cognitive disorder	11	Relative hand skill in reading disability	1
Mental disorder	57	Autism	8	Dementia / Alzheimer's Disease	4
Mental disorder	57	Autism	8	Asperger syndrome	2
Mental disorder	57	Autism	8	Autism spectrum disorder	2
Mental disorder	57	Sleep disorder	5	Adjustment reaction	5
Mental disorder	57	Delusional disorder	4	Schizophrenia	4
Mental disorder	57	Other mental disorders	3	Other persistent mental disorders	3
Mental disorder	57	Motor deterioration	2	Psychogenic and somatoform disorders	1
Mental disorder	57	Motor deterioration	2	Psychomotor deterioration	1
Mental disorder	57	Mental deficiency	1	Epilepsy-endocrine disorders	1
Mental disorder	57	Drug dependence	1	Phencyclidine-Related Disorders	1
Congenital anomalies	48	Musculoskeletal Abnormalities	16	Cleft palate / bilateral cleft lip	4
Congenital anomalies	48	Musculoskeletal Abnormalities	16	Forehead morphology	2
Congenital anomalies	48	Musculoskeletal Abnormalities	16	Microcephaly	2
Congenital anomalies	48	Musculoskeletal Abnormalities	16	Arthrogryposis	2
Congenital anomalies	48	Musculoskeletal Abnormalities	16	Limbs	2
Congenital anomalies	48	Musculoskeletal Abnormalities	16	Polydactyly	1
Congenital anomalies	48	Musculoskeletal Abnormalities	16	Zechi Ceide syndrome	1
Congenital anomalies	48	Musculoskeletal Abnormalities	16	Congenital hypoplasia of femur	1
Congenital anomalies	48	Musculoskeletal Abnormalities	16	Adducted thumb	1
Congenital anomalies	48	Hematopoietic system disease	14	Congenital hemolytic anemia / dyserythropoietic anemia/ thalassemia	9
Congenital anomalies	48	Hematopoietic system disease	14	Congenital coagulation defects	4
Congenital anomalies	48	Hematopoietic system disease	14	Hemoglobinopathy - Sickle cell anemia	1
Congenital anomalies	48	Liver	6	Congenital disorders of glycosylation / Congenital porphyria	6
Congenital anomalies	48	Reproductive organ	4	Genital organs	4
Congenital anomalies	48	Eye	3	Congenital anomalies of the eye	1
Congenital anomalies	48	Eye	3	Congenital euryblepharon	1
Congenital anomalies	48	Eye	3	Kabuki syndrome eyelids	1
Congenital anomalies	48	Nervous system disease	2	Lissencephaly	1
Congenital anomalies	48	Nervous system disease	2	Brain-Leukomalacia	1
Congenital anomalies	48	Skin disease	2	Xeroderma pigmentosum	1
Congenital anomalies	48	Skin disease	2	Rothmund Thomson syndrome	1
Congenital anomalies	48	Lifespan	1	Parental lifespan	1
Congenital anomalies	48	Cardiovascular System Disorder	1	Conotruncal heart malformations	1
Congenital anomalies	48	Adrenal Gland	1	X-linked adrenal hypoplasia congenita	1
Congenital anomalies	48	Tetraploidy	1	Tetraploidy	1
Respiratory system disease	48	Asthma	18	Asthma (Acute/ Allergic)	18
Respiratory system disease	48	COPD	10	Chronic Obstructive Airway Disease / COPD	9
Respiratory system disease	48	COPD	10	Central hypoventilation syndrome	1
Respiratory system disease	48	Pulmonary Sarcoidosis/fibrosis	7	Pulmonary sarcoidosis/fibrosis	7
Respiratory system disease	48	Pneumonia	5	Pneumonia / Pneumonitis / Pneumoconiosis	5
Respiratory system disease	48	Lung Injury	2	Lung Injury	2
Respiratory system disease	48	Cystic fibrosis	2	Cystic fibrosis	2
Respiratory system disease	48	Bronchitis	1	Bronchitis (Fetid chronic)	1
Respiratory system disease	48	Berylliosis	1	Berylliosis	1
Respiratory system disease	48	Acute laryngitis	1	Acute laryngitis and tracheitis	1
Respiratory system disease	48	Sinusitis	1	Sinusitis	1
Eye Disease	42	Retinal degeneration	15	Macular degeneration / Macular degeneration (Age-related)	13
Eye Disease	42	Retinal degeneration	15	Peripheral retinal degenerations	2
Eye Disease	42	Optic nerve	5	Occipital horn syndrome	5
Eye Disease	42	Conjunctivitis	5	Conjunctivitis (Viral / Allergic)	5
Eye Disease	42	Retinal detachments	5	Retinal detachments / Separation of retinal layers	3
Eye Disease	42	Retinal detachments	5	Vitreoretinopathy	2
Eye Disease	42	Lens disease	5	Cataract	3
Eye Disease	42	Lens disease	5	Rhizomelic chondrodysplasia punctata	2
Eye Disease	42	Other eye disease	4	Keratitis	2
Eye Disease	42	Other eye disease	4	Shallow anterior chamber of eye	1
Eye Disease	42	Other eye disease	4	Visual field defect	1
Eye Disease	42	Eyelid disease	2	Lagophthalmos and other	2
Eye Disease	42	Retinal vasculopathy	2	Retinal vascular changes and abnomalitie	1
Eye Disease	42	Retinal vasculopathy	2	Eales disease	1
Eye Disease	42	Neuro-ophthalmological disease	1	Treacher Collins syndrome	1
Gastrointestinal System Disease	38	Inflammatory Bowel Diseases	23	Ulcerative colitis	12
Gastrointestinal System Disease	38	Inflammatory Bowel Diseases	23	Inflammatory Bowel Diseases (IBD)	7
Gastrointestinal System Disease	38	Inflammatory Bowel Diseases	23	Crohn's disease	4
Gastrointestinal System Disease	38	Mouth disease	5	Dental cavity	3
Gastrointestinal System Disease	38	Mouth disease	5	Periapical Abscess	1
Gastrointestinal System Disease	38	Mouth disease	5	Disorders of tooth development	1
Gastrointestinal System Disease	38	Mouth disease	5	Geographic tongue	1
Gastrointestinal System Disease	38	Cyst	3	Cysticercosis	2
Gastrointestinal System Disease	38	Cyst	3	Cyst and pseudocyst of pancreas	1
Gastrointestinal System Disease	38	Barrett's esophagus	2	Barrett's esophagus	2
Gastrointestinal System Disease	38	Collagenous colitis	1	Collagenous colitis	1
Gastrointestinal System Disease	38	Serrated polyp	1	Serrated polyp	1
Gastrointestinal System Disease	38	Diarrhea	1	Lymphocytic colitis (watery diarrhea)	1
Gastrointestinal System Disease	38	Acute periodontitis	1	Acute periodontitis	1
Gastrointestinal System Disease	38	Dilatation	1	Ogilvie syndrome	1
Urinary System Disease	30	Kidney Disease	29	Chronic Kidney Disease	13
Urinary System Disease	30	Kidney Disease	29	Glomerulonephritis	5
Urinary System Disease	30	Kidney Disease	29	Diabetic kidney disease / Diabetic Nephropathy	4
Urinary System Disease	30	Kidney Disease	29	Renal failure (Acute / NOS)	3
Urinary System Disease	30	Kidney Disease	29	Distal Renal Tubular Acidosis	1
Urinary System Disease	30	Kidney Disease	29	Bartter syndrome (Electrolite imbalance)	1
Urinary System Disease	30	Kidney Disease	29	Cyst of kidney, acquired	1
Urinary System Disease	30	Kidney Disease	29	Renal rickets	1
Urinary System Disease	30	Prostate Disease	1	Other disorders of prostate	1
Urinary System Disease	30	Urethral Disease	1	Urethral hypermobility	1
Skin disease	24	Skin thickening/ growth	10	Lchthyosis / Keratosis	5
Skin disease	24	Skin thickening/ growth	10	Plantar warts	2
Skin disease	24	Skin thickening/ growth	10	Papillon Lefevre syndrome	2
Skin disease	24	Skin thickening/ growth	10	Eczema	1
Skin disease	24	Loose/ wrinkling	5	Cutis laxa / Cutis laxa, x-linked	4
Skin disease	24	Loose/ wrinkling	5	Geroderma osteodysplasticum (skin wrinkling)	1
Skin disease	24	Fragile skin/ blister	4	Dystrophic epidermolysis bullosa	2
Skin disease	24	Fragile skin/ blister	4	Shingles (Blister)	1
Skin disease	24	Fragile skin/ blister	4	Lichen sclerosis	1
Skin disease	24	Cellulitis	2	Cellulitis and abscess of fingers/toes	2
Skin disease	24	Cellulitis	2	Superficial cellulitis and abscess	2
Skin disease	24	Pigmentation	2	Oculocutaneous albinism type 1	1
Skin disease	24	Pigmentation	2	Dyskeratosis	1
Skin disease	24	Fungal infection	1	Candidiasis	1
Liver Disease	20	Liver Disease	20	Liver Cirrhosis	11
Liver Disease	20	Liver Disease	20	Other liver disease	3
Liver Disease	20	Liver Disease	20	Bilirubin excretion disorder	2
Liver Disease	20	Liver Disease	20	Alcoholic liver damage	2
Liver Disease	20	Liver Disease	20	Microvesicular hepatic steatosis	1
Liver Disease	20	Liver Disease	20	Cholestasis	1
Hematopoietic system disease	19	Hemoglobin / Anemia	8	Anemia/ Anemia, hereditary spherocytic hemolytic	5
Hematopoietic system disease	19	Hemoglobin / Anemia	8	Fetal hemoglobin quantitative trait locus	2
Hematopoietic system disease	19	Hemoglobin / Anemia	8	Hemochromatosis	1
Hematopoietic system disease	19	Blood platelet disease	5	Thrombophilia	5
Hematopoietic system disease	19	Elliptocytosis	2	Elliptocytosis, Hereditary / Familial erythrocytosis 1	2
Hematopoietic system disease	19	POEMS Syndrome	2	POEMS Syndrome	2
Hematopoietic system disease	19	Thrombocytemia	1	Essential Thrombocytemia	1
Hematopoietic system disease	19	Spherocytosis	1	Hereditary spherocytosis	1
Sepsis	15	Sepsis / Septicemia / Septic Shock	15	Sepsis / Septicemia	11
Sepsis	15	Sepsis / Septicemia / Septic Shock	15	Septic Shock	4
Response to drug	8	Response to drug	8	Response to fenofibrate (adiponectin levels)	1
Response to drug	8	Response to drug	8	Response to antineoplastic agents	1
Response to drug	8	Response to drug	8	Opiates and related narcotics causing adverse effects in therapeutic use	1
Response to drug	8	Response to drug	8	Response to methylphenidate treatment in ADHD (blood pressure)	1
Response to drug	8	Response to drug	8	Remission after SSRI treatment in MDD or openness	1
Response to drug	8	Response to drug	8	Cisplatin-induced ototoxicity	1
Response to drug	8	Response to drug	8	Response to antipsychotic treatment in schizophrenia (working memory)	1
Response to drug	8	Response to drug	8	Response to tocilizumab in rheumatoid arthritis	1
Behavior process	7	Addiction	4	Alcohol consumption	2
Behavior process	7	Addiction	4	Phencyclidine Abuse	1
Behavior process	7	Addiction	4	Cocaine dependence	1
Behavior process	7	Suicide behavior	1	Suicide behavior	1
Behavior process	7	Eating disorders	1	Eating disorders (purging via substances)	1
Behavior process	7	Exercise behaviour	1	Leisure-time exercise behaviour	1
Female reproductive system disease	7	Vulva	3	Abscess or ulceration of vulva	3
Female reproductive system disease	7	Menstruation disorder	5	Dysmenorrhea pain severity	4
Female reproductive system disease	7	Menstruation disorder	5	Menstruation disorder	1
Hypersensitivity reaction disease	5	Allergy	5	Atopy	4
Hypersensitivity reaction disease	5	Allergy	5	Allergies	1
Hernia	2	Hernia	2	Hernia	2
Male reproductive disease	2	Male reproductive disease	2	Leydig cells hypoplasia	1
Male reproductive disease	2	Male reproductive disease	2	Erectile dysfunction in type 1 diabetes	1
Ear disease	1	Ear disease	1	Eustachian tube disorders	1
Hair disease	1	Alopecia	1	Alopecia	1
Therapeutics	1	Therapeutics	1	Immunosuppression	1

## Sheet: TP
Rank	Parent	Count of occurrence	References	TOP Parents			27 / 28 X 100 = 96.42 %
1	Infectious disease	154	45	Accuracy: 96.42 %
2	Neoplasm	135	46
3	Abnormal sign or symptom	118	5, 6, 18, 6, 97, 134
4	Cardiovascular System Disease	103	47, 48
5	Immune System Disorder/Autoimmune diseases	86	49, 50
6	Nervous system disease	84	61, 62
7	Musculoskeletal system disease	82	63, 64
8	Metabolic disorder	73	51, 52
9	Mental disorder	57	30, 34
10	Congenital anomalies	48	53, 54
10	Respiratory system disease	48	48
11	Eye Disease	42	67
12	Gastrointestinal System Disease	38	55
13	Urinary System Disease	30	56, 57
14	Skin disease	24	68, 69
15	Liver Disease	20	58
16	Hematopoietic system disease	19	59
17	Sepsis	15	60
18	Response to drug	8	13
19	Behavior process	7	30, 34
19	Female reproductive system disease	7	65, 66, 70
20	Hypersensitivity reaction disease	5	140
21	Hernia	2
21	Male reproductive disease	2	65, 66
22	Ear disease	1	28
22	Hair disease	1	202
22	Therapeutics	1	13

## Sheet: TC
Rannk	Child	Count of occurrence	References	TOP Child			Cut off 4: 75 / 86 X 100 = 87.2 % Cut off 4 (-congenital): 78 / 86 X 100 = 90.69 %
1	Viral	116	130, 142	Accuracy: 87.2 %, at Cut off 4 Accuracy: 90.69 %, at cut off 4, without congenital conditions
2	Autoimmune disease	68	50
3	Blood	59	153, 168
4	Vascular disease	53	71
5	Kidney Disease	29	56, 57
6	Neurodegenerative disease	28	72
7	Bone inflammation disease	27	73
8	Myocardial disorder	25	74
8	Mood disorder	25	34
9	Bacterial Infections and Mycoses	23	104, 105
9	Inflammatory Bowel Diseases	23	95
10	Breast cancer	20	75
10	Liver Disease	20	58
11	Gynecologic cancers	19	76
12	Asthma	18	77
13	Liver cancer	17	78
14	Musculoskeletal Abnormalities	16	63
15	Hematologic cancer	15	79
15	Retinal degeneration	15	80
15	Sepsis / Septicemia / Septic Shock	15	60, 81
16	Nervous system neoplasms	14
16	Myopathy	14	136, 137
16	Diabetes	14	82
16	Hematopoietic system disease	14	59
17	Other cardiovascular Diseases	12	71, 74
17	Brain - Viral encephalitis	12	83
18	Head and neck cancer	11
18	Other cognitive disorder	11	24
19	fever / severe fever with thrombocytopenia syndrome	10	5
19	Immunodeficiency	10	84
19	Other brain disease	10	85
19	COPD	10	86
19	Skin diseases/ thickening/ growth	10	116, 133
20	Gastric / Colon cancer	9	87
20	Pain	9	18
20	Bone development disease	9	91
20	Bone degenerative disease	9	91
21	Lysosomal storage disease	8
21	Autism	8	88, 89
21	Hemoglobin / Anemia	8	90
21	Response to drug	8	13
22	Parasitic protozoa	7	143
22	Lung function	7	96, 97
22	Throat pain	7	134
22	Eye Disease	7	27, 67
22	Spinal nerve disease	7
22	Bone resorption disease	7	91
22	Cholesterol level	7	92, 93
22	Metabolic Syndrome X	7	51, 114
22	Pulmonary sarcoidosis/fibrosis	7	175
23	Cardiac channelopathy	6	119
23	Brain - Meningitis	6	155
23	Ataxia	6	94
23	Endocrine system disease	6
23	Liver	6	12, 109, 162
24	Adenoma/ Adenocarcinoma	5	46, 75
24	Bone / Cartilage	5	73, 91
24	Prostate cancer	5
24	Fatigue	5	6
24	Bone fracture	5
24	Sleep disorder	5	98
24	Pneumonia	5	86
24	Optic nerve	5	126
24	Conjunctivitis	5	99
24	Retinal detachments	5	80
24	Lens disease	5	203
24	Skin Loose/ wrinkling	5
24	Blood platelet	5	17
24	Menstruation disorder	5	176
24	Allergy	5	140
25	Germ cell cancer	4
25	Chest symptoms	4	134
25	Mental health	4	30, 31, 34
25	Electrical cardiac activity	4	119
25	Epilepsy/Seizures	4	204
25	Scleroderma	4	205
25	Beta-galactosidase-1 deficiency	4
25	C-reactive protein	4	16
25	Amyloidosis	4	183
25	Glycemic trait	4	167
25	Protoporphyria	4
25	Delusional disorder	4	206
25	Reproductive organ disaease	4	65, 66, 70
25	Other eye disease	4	80
25	Fragile skin/ blisters	4	207
25	Addiction	4	189
26	Parasitic flatworm	3
26	Hyperthyroidism	3
26	Auditory system disease	3
26	Dystonic syndrome	3
26	Bone dysplasia	3
26	Aspartylglucosaminuria	3
26	Other mental disorders	3
26	Eye	3
26	Cyst	3
26	Vulva	3
27	Pericardium disease	2
27	Connective Tissue Disorder	2
27	Spine disease	2
27	Insulin response	2
27	Obesity	2	14
27	Motor deterioration	2
27	Nervous system disease	2
27	Skin disease	2
27	Lung Injury	2
27	Cystic fibrosis	2
27	Eyelid disease	2
27	Retinal vasculopathy	2
27	Barrett's esophagus	2
27	Cellulitis	2
27	Pigmentation	2
27	Elliptocytosis	2
27	POEMS Syndrome	2
27	Hernia	2
27	Male reproductive disease	2
28	Gastrointestinal disease	1
28	Lung cancer	1
28	Muir-Torre syndrome	1
28	Pancreatic cancer	1
28	Urothelial carcinoma	1
28	Valve disease	1
28	Lymphadenitis	1
28	Transplant rejection	1
28	Lymphocyte syndrome	1
28	Autoinflammatory disorder	1
28	Lymphohistiocytosis	1
28	Aicardi syndrome	1
28	Facial nerve disorders	1
28	Nerve plexus lesions	1
28	Neurological pain	1
28	Paralytic syndromes	1
28	Hypertonia	1
28	Hyperostosis	1
28	Clayton-Smith Donnai syndrome	1
28	Tendonitis	1
28	Metabolic disorder	1
28	Plasminogen deficiency	1
28	Acidaemia	1
28	Decreased body weigh	1
28	Mental deficiency	1
28	Drug dependence	1
28	Lifespan	1
28	Cardiovascular System Disorder	1
28	Adrenal Gland	1
28	Tetraploidy	1
28	Bronchitis	1
28	Berylliosis	1
28	Acute laryngitis	1
28	Sinusitis	1
28	Neuro-ophthalmological disease	1
28	Collagenous colitis	1
28	Serrated polyp	1
28	Diarrhea	1
28	Acute periodontitis	1
28	Dilatation	1
28	Prostate Disease	1
28	Urethral Disease	1
28	Fungal infection	1
28	Thrombocytemia	1
28	Spherocytosis	1
28	Suicide behavior	1
28	Eating disorders	1
28	Exercise behaviour	1
28	Ear disease	1
28	Alopecia	1
28	Therapeutics	1

## Sheet: SD
Rank	Specific disease name	Count of occurrence	References	TOP Specific Disease				Cut off 4: 82 / 106 X 100 = 77.35 % Cut off 4 (-congenital): 94 / 106 X 100 = 88.67 %
1	Lupus erythematosus (Syatematic)	29	100	Accuracy: 77.35 %, at Cut off 4 Accuracy: 88.67 %, at cut off 4, without congenital conditions
2	Depressed mood / Depressive disorder / Mental Depression	23	30, 101
3	Hepatitis C	21	102
4	Breast cancer / Sporadic Breast cancer	20	75
5	Influenza	19	129
5	Ceroid lipofuscinosis neuronal	19
5	Arthritis / Rheumatoid Arthritis	19	103
6	Asthma (Acute/ Allergic)	18	10, 77
6	Liver cancer	17	78
7	Dengue	15	130
7	Tuberculosis / Mycobacterial infections (Recurrent)	15	104, 105
8	Diabetes type 1 / type 2	14	82
9	Myocardial infarction / Myocardial infarction (Early onset / Acute)	13	35, 106
9	Macular degeneration / Macular degeneration (Age-related)	13	80
9	Chronic Kidney Disease	13	56, 57
10	Arteriosclerosis	12	107
10	Other cardiovascular diseases	12	71, 74
10	Ulcerative colitis	12	108
11	Reticulocyte fraction of red cells - High light scatter reticulocyte percentage of red cells	11	147
11	Liver Cirrhosis	11	12, 109
11	Sepsis / Septicemia/Septic Shock	11	60, 81
12	Fever / Severe fever with thrombocytopenia syndrome	10	5
12	Other autoimmune diseases	10	49
13	Endometrial cancer	9
13	Pain / Possible neuropathic pain	9	18
13	Cerebrovascular accident / Stroke	9	110
13	Congenital hemolytic anemia / dyserythropoietic anemia/ thalassemia	9	111
13	Chronic Obstructive Airway Disease / COPD	9	86
14	HIV	8	25
14	Multiple myeloma	8	112
14	Hypertensive disease	8	9, 113
14	C1q Deficiency	8
14	Dermatomyositis (Amyopathic / Childhood Type)	8	131
15	Nervous system Brain Neoplasms/Glioblastoma/Glioma	7	188
15	Embolism / Thrombosis	7	132
15	Cholesterol level/ Hypercholesterolemia/ Hyperlipidemia	7	93
15	Metabolic Syndrome X	7	51, 114
15	Pulmonary sarcoidosis/fibrosis	7	175
15	Inflammatory Bowel Diseases (IBD)	7	95
16	Respiratory syncytial virus (RSV) infection	6	142
16	Malaria	6	143
16	Painful respiration / Dyspnea / Dependence on respirator [Ventilator]	6	5
16	Carotid Atherosclerosis	6	107
16	Lupus erythematosus (Discoid)	6	100
16	Osteoporosis	6	91
16	Congenital disorders of glycosylation / Congenital porphyria	6
17	West Nile fever	5
17	Cervical cancer	5
17	Ovarian cancer	5	14
17	Nasopharyngeal carcinoma	5
17	Prostate cancer (early onset)	5	115
17	Lipoprotein-associated phospholipase A2 activity and mass	5	148
17	Conjunctivitis (Viral / Allergic)	5	99
17	Other cardiomyopathy	5	15
17	Psoriasis / Psoriasis vulgaris / Psoriasis and related disorders	5	116
17	Cervical radiculitis	5
17	Adjustment reaction	5	208
17	Pneumonia / Pneumonitis / Pneumoconiosis	5	86
17	Occipital horn syndrome	5
17	Conjunctivitis (Viral / Allergic)	5	99
17	Glomerulonephritis	5	209
17	Lchthyosis / Keratosis	5	133
17	Anemia/ Anemia, hereditary spherocytic hemolytic	5	90, 111
17	Thrombophilia	5	210
18	Enterovirus 71 infection	4
18	Marburg hemorrhagic fever	4
18	Parainfluenza / Parainfluenza virus type 3	4	129
18	Leukemia / CLL	4	117, 118
18	Colorectal cancer	4	87
18	Melanoma	4
18	Malignant germ cell tumor	4
18	Circulating myeloperoxidase levels (serum)	4	150
18	Throat pain / Strep throat / Cold sores	4	134
18	Transient alteration of awareness / Fatigue	4	5
18	Abnormal chest sounds and Nonspecific chest pain	4	134
18	Feeling tense / Anxiety disorder/ Tension headache	4	135
18	Aneurysm (Aortic/ Thoracic / Abdominal)	4	138
18	Infectious myocarditis	4	136, 137
18	Long QT Syndrome	4	119
18	Neuromyelitis optica	4	126
18	Multiple Sclerosis	4	181
18	Tay Sachs disease	4
18	Nipah virus encephalitis	4	83
18	California encephalitis	4	83
18	Unverricht-Lundborg disease	4
18	Pigmented villonodular synovitis	4
18	Myositis (Infectious / Focal)	4	139
18	Gangliosidosis GM1 type 3	4
18	Sandhoff disease	4
18	Secondary hyperparathyroidism of renal origin	4
18	Beta-galactosidase-1 deficiency	4
18	C-reactive protein	4	16
18	Amyloidosis (Aquired)	4	182
18	Hyperglycemia/Dysglycemia/ Disorder of glycosylation	4	167
18	Protoporphyria / Erythropoietic protoporphyria (Inherited)	4
18	Language disorder - Aphasia	4	184, 185
18	Intellectual disability - Aicardi-Goutieres Syndrome/ Down syndrome/ Atkin syndrome	4	122, 123
18	Dementia / Alzheimer's Disease	4	120
18	Schizophrenia	4	121
18	Cleft palate / bilateral cleft lip	4
18	Congenital coagulation defects	4	194
18	Crohn's disease	4	172
18	Diabetic kidney disease / Diabetic Nephropathy	4	124
18	Cutis laxa / Cutis laxa, x-linked	4
18	Dysmenorrhea pain severity	4
18	Atopy	4	127, 128
19	Viral Enteritis	3
19	Hepatitis B virus infection/ susceptibility	3
19	Chikungunya Fever	3
19	Measles	3
19	Schistosomiases	3
19	Cartilaginous cancer/ Chondroma / Enchondroma	3
19	Matrix metalloproteinase-8 levels	3
19	Plasma PCSK9 levels in stable coronary artery disease	3
19	Lipoprotein level	3
19	Abnormal erythrocyte morphology - Spherocytosis	3
19	Epiglottitis	3
19	Dural Arteriovenous Fistula	3
19	Graves' disease	3
19	Meningitis - Neonatal meningitis	3
19	Dancing feet syndrome	3
19	Otitis media	3
19	CREST Syndrome	3
19	Ceroid storage disease	3
19	Polycystic lipomembranous osteodysplasia with sclerosing leukoencephalopathy	3
19	Aspartylglucosaminuria	3
19	Other persistent mental disorders	3
19	Retinal detachments / Separation of retinal layers	3
19	Cataract	3
19	Dental cavity	3
19	Renal failure (Acute / NOS)	3
19	Other liver disease	3
19	Abscess or ulceration of vulva	3
20	Rabies	2
20	Rotavirus infection	2
20	Mumps	2
20	Sexually transmitted infections (not HIV or hepatitis)	2
20	Poxviridae Infections	2
20	Rhinovirus infection	2
20	Posttraumatic wound infection	2
20	Other bacterial Infections	2
20	Lymphoma	2
20	Nervous system Anaplastic Oligoastrocytoma	2
20	Larynx cancer	2
20	Sarcoma / Fibrosarcoma	2
20	Nonspecific findings on examination of blood	2
20	Total bilirubin levels	2
20	Plasma plasminogen activator levels	2
20	Liver enzyme levels	2
20	Hemoglobin levels	2
20	Plasma parathyroid hormone levels	2
20	Plasminogen activator inhibitor type 1 levels (PAI-1)	2
20	Abnormal results of other function studies (bladder, pancreas, placenta, spleen, etc)	2
20	Bone mineral density	2
20	Keratitis	2
20	Giant cell arteritis	2
20	Arrhythmogenic right ventricular dysplasia	2
20	Short QT Syndrome	2
20	Pericarditis	2
20	Immunodeficiency	2
20	Parkinson disease	2
20	Moyamoya disease	2
20	Adrenoleukodystrophy	2
20	Other allied disorders of spine	2
20	Episodic ataxia	2
20	Febrile seizures	2
20	Muscular dystrophy	2
20	Degenerative polyarthritis	2
20	Paget disease of bone familial	2
20	Schmorl's nodes	2
20	Hypothyroidism	2
20	Corrected insulin response	2
20	Obesity	2
20	Bipolar disorder	2
20	Asperger syndrome	2
20	Autism spectrum disorder	2
20	Forehead morphology	2
20	Microcephaly	2
20	Arthrogryposis	2
20	Limbs	2
20	Lung Injury	2
20	Cystic fibrosis	2
20	Peripheral retinal degenerations	2
20	Vitreoretinopathy	2
20	Rhizomelic chondrodysplasia punctata	2
20	Keratitis	2
20	Lagophthalmos and other	2
20	Cysticercosis	2
20	Barrett's esophagus	2
20	Plantar warts	2
20	Papillon Lefevre syndrome	2
20	Dystrophic epidermolysis bullosa	2
20	Cellulitis and abscess of fingers/toes	2
20	Superficial cellulitis and abscess	2
20	Bilirubin excretion disorder	2
20	Alcoholic liver damage	2
20	Fetal hemoglobin quantitative trait locus	2
20	Elliptocytosis, Hereditary / Familial erythrocytosis 1	2
20	POEMS Syndrome	2
20	Alcohol consumption	2
20	Hernia	2
21	Zaire ebolavirus	1
21	Zika Virus Infection	1
21	Togaviridae disease	1
21	Vesicular Stomatitis	1
21	Coronavirus infectious - Severe acute respiratory syndrome (SARS)	1
21	Sindbis virus infection	1
21	Yersinia enterocolitica	1
21	Spotted fever	1
21	Clostridium sordellii	1
21	Melioidosis	1
21	Protozoan Infection	1
21	Infectious colitis	1
21	Myeloproliferative disease	1
21	Neoplasm of uncertain behavior	1
21	Nervous system Neurofibromatosis	1
21	Nervous system Neuroma / Acoustic neuroma	1
21	Esophagal cancer	1
21	Pharynx	1
21	Squamous cell carcinoma of mouth	1
21	Squamous cell carcinoma of the head and neck	1
21	Rectosigmoid neoplasm	1
21	Angiokeratoma	1
21	Cylindrocarcinoma	1
21	Nevus (type of Skin cancer)	1
21	Skin cancer (Secondary malignant neoplasm of skin)	1
21	Lung cancer	1
21	Muir-Torre syndrome	1
21	Pancreatic cancer	1
21	Urothelial carcinoma in situ	1
21	Amyloid A serum levels	1
21	Bone-marrow foam cells	1
21	Lactate dehydrogenase levels	1
21	Poisoning by agents primarily affecting blood constituents	1
21	Neutrophil count in HIV-infection	1
21	Vitamin E levels	1
21	D-dimer levels	1
21	Purpura, Idiopathic Thrombocytopenic	1
21	Beta-2 microglubulin plasma levels	1
21	Tachycardia	1
21	Chronic ulcer	1
21	Blond vs. brown hair color	1
21	Postnasal drip	1
21	Flue like - Bubonic plague	1
21	Disorders of cervical region	1
21	Forced vital capacity	1
21	Response to stress	1
21	Peripheral angiopathy	1
21	Vasospasm, Intracranial	1
21	Cardiac Hypertrophy	1
21	Cardiac repolarization	1
21	Global electrical heterogeneity phenotypes	1
21	Cardiac pacemaker	1
21	Cardiac defibrillator in situ	1
21	Nonrheumatic mitral valve disorders	1
21	Autoimmune enteropathy	1
21	Polymyalgia Rheumatica	1
21	Myasthenia gravis	1
21	Antisynthetase syndrome	1
21	Celiac disease	1
21	Polyglandular syndrome type 1	1
21	Polyglandular syndrome type 2	1
21	Simian Acquired Immune Deficiency Syndrome	1
21	Histiocytic Necrotizing Lymphadenitis	1
21	Lung transplant rejection	1
21	Bare lymphocyte syndrome	1
21	Autoinflammatory disorder	1
21	Hemophagocytic lymphohistiocytosis	1
21	Familial idiopathic basal ganglia calcification	1
21	Motor neuron atrophy- Amyotrophic lateral sclerosis	1
21	Huntington disease	1
21	Whole-brain volume (Alzheimer's disease interaction)	1
21	West nile encephalitis	1
21	Tick-borne encephalitis	1
21	Japanese encephalitis	1
21	Leukodystrophy	1
21	Cerebral Ischemia	1
21	Pontocerebellar Hypoplasia Type 1	1
21	Cerebral Infarction (stroke)	1
21	Periventricular leukomalacia	1
21	Cerebral palsy	1
21	Canavan disease	1
21	Spinocerebellar ataxia type 17	1
21	Aicardi syndrome	1
21	Facial nerve disorders [CN7]	1
21	Nerve plexus lesions	1
21	Neurological pain disorder	1
21	Other paralytic syndromes	1
21	Dermatomyositis	1
21	Arthritis - Felty's syndrome	1
21	Osteoarthritis	1
21	Gout and other crystal arthropathies	1
21	Polymyositis, Idiopathic	1
21	Schwartz Jampel syndrome type 1	1
21	Polymyositis Ossificans	1
21	Nemaline myopathy	1
21	Unequal leg length (acquired)	1
21	Ulnar bowing	1
21	Melnick-Needles syndrome	1
21	Bone necrosis	1
21	Pseudoepiphyses of the metacarpals	1
21	Fibrodysplasia ossificans progressiva	1
21	Palmar fascia	1
21	Osteopenia	1
21	Fracture of ribs	1
21	Fracture of pelvis	1
21	Fractures	1
21	Fibrous dysplasia	1
21	Fracture of femur	1
21	Maffucci syndrome	1
21	Hereditary Connective Tissue Disorder	1
21	Increased endomysial connective tissue	1
21	Lower limb spasticity - spastic paraplegia	1
21	Sclerosteosis	1
21	Clayton-Smith Donnai syndrome	1
21	Contracture	1
21	Alpha-1 anti-trypsin deficiency	1
21	Type 1 plasminogen deficiency	1
21	neuro-Gamma-hydroxybutyric acidaemia	1
21	Slender build	1
21	Formal thought disorder in schizophrenia	1
21	Memory performance	1
21	Relative hand skill in reading disability	1
21	Psychogenic and somatoform disorders	1
21	Psychomotor deterioration	1
21	Epilepsy-endocrine disorders	1
21	Phencyclidine-Related Disorders	1
21	Polydactyly	1
21	Zechi Ceide syndrome	1
21	Congenital hypoplasia of femur	1
21	Adducted thumb	1
21	Hemoglobinopathy - Sickle cell anemia	1
21	Congenital anomalies of the eye	1
21	Congenital euryblepharon	1
21	Kabuki syndrome eyelids	1
21	Lissencephaly	1
21	Brain-Leukomalacia	1
21	Xeroderma pigmentosum	1
21	Rothmund Thomson syndrome	1
21	Parental lifespan	1
21	Conotruncal heart malformations	1
21	X-linked adrenal hypoplasia congenita	1
21	Tetraploidy	1
21	Central hypoventilation syndrome	1
21	Bronchitis (Fetid chronic)	1
21	Berylliosis	1
21	Acute laryngitis and tracheitis	1
21	Sinusitis	1
21	Shallow anterior chamber of eye	1
21	Visual field defect	1
21	Retinal vascular changes and abnomalitie	1
21	Eales disease	1
21	Treacher Collins syndrome	1
21	Periapical Abscess	1
21	Disorders of tooth development	1
21	Geographic tongue	1
21	Cyst and pseudocyst of pancreas	1
21	Collagenous colitis	1
21	Serrated polyp	1
21	Lymphocytic colitis (watery diarrhea)	1
21	Acute periodontitis	1
21	Ogilvie syndrome	1
21	Distal Renal Tubular Acidosis	1
21	Bartter syndrome (Electrolite imbalance)	1
21	Cyst of kidney, acquired	1
21	Renal rickets	1
21	Other disorders of prostate	1
21	Urethral hypermobility	1
21	Eczema	1
21	Geroderma osteodysplasticum (skin wrinkling)	1
21	Shingles (Blister)	1
21	Lichen sclerosis	1
21	Oculocutaneous albinism type 1	1
21	Dyskeratosis	1
21	Candidiasis	1
21	Microvesicular hepatic steatosis	1
21	Cholestasis	1
21	Hemochromatosis	1
21	Essential Thrombocytemia	1
21	Hereditary spherocytosis	1
21	Response to fenofibrate (adiponectin levels)	1
21	Response to antineoplastic agents	1
21	Opiates and related narcotics causing adverse effects in therapeutic use	1
21	Response to methylphenidate treatment in ADHD (blood pressure)	1
21	Remission after SSRI treatment in MDD or openness	1
21	Cisplatin-induced ototoxicity	1
21	Response to antipsychotic treatment in schizophrenia (working memory)	1
21	Response to tocilizumab in rheumatoid arthritis	1
21	Phencyclidine Abuse	1
21	Cocaine dependence	1
21	Suicide behavior	1
21	Eating disorders (purging via substances)	1
21	Leisure-time exercise behaviour	1
21	Menstruation disorder	1
21	Allergies	1
21	Leydig cells hypoplasia	1
21	Erectile dysfunction in type 1 diabetes	1
21	Eustachian tube disorders	1
21	Alopecia	1
21	Immunosuppression	1
