# Supplementary material for: A novel multi-omics-based highly accurate prediction of symptoms, comorbid conditions, and possible long-term complications of COVID-19
Source: Royal Society of Chemistry journal article supplement (doi:10.1039/d0mo00189a), 2021-02-18
Supplement: d0mo00189a2.xlsx [file d0mo00189a2.xlsx]

## Sheet: S
Rank	Short Specific infectious diseases	Count of occurrence	References			Rank	Short Specific non- infectious diseases/ conditions	Count of occurrence	References
1	Influenza	19	129			1	High light scatter reticulocyte percentage of red cells	11	147
2	Dengue	15	130			1	Sepsis / Septicemia	11	60, 81
3	Respiratory syncytial virus (RSV) infection	6	142			2	Fever / Severe fever with thrombocytopenia syndrome	10	144
3	Malaria	6	143			3	Pain	9	145
4	West Nile fever	5				4	Painful respiration / Dyspnea / Dependence on respirator [Ventilator]	6	5
5	Enterovirus 71 infection	4		Cut off 4: 5 / 8 X 100 = 62.5 %		5	Lipoprotein-associated phospholipase A2 activity and mass	5	148	Cut off 4: 18/18 X 100 = 100 % Cut off 3: 23 / 25 X 100 = 92 %
5	Marburg hemorrhagic fever	4				5	Conjunctivitis (Viral / Allergic)	5	99
5	Parainfluenza / Parainfluenza virus type 3	4	129			5	Pneumonia / Pneumonitis / Pneumoconiosis	5	86
6	Viral Enteritis	3				5	Thrombophilia	5	210
6	Chikungunya Fever	3		Accuracy: 62.5 %, at cut off 4		6	Circulating myeloperoxidase levels (serum)	4	150	Accuracy: 100.00 %, at cut off 4 Accuracy: 92.00 %, at cut off 3
6	Measles	3				6	Throat pain / Strep throat / Cold sores	4	134
7	Rabies	2				6	Fatigue / Transient alteration of awareness	4	5
7	Rotavirus infection	2				6	Abnormal chest sounds and Nonspecific chest pain	4	134
7	Mumps	2				6	Feeling tense / Anxiety disorder/ Tension headache	4	135
7	Sexually transmitted infections (not HIV or hepatitis)	2				6	Nipah virus encephalitis	4	83
7	Poxviridae Infections	2				6	California encephalitis	4	83
7	Rhinovirus infection	2				6	C-reactive protein	4	16
7	Other bacterial Infections	2				6	Septic Shock	4	60, 81
8	Zaire ebolavirus	1				7	Schistosomiases	3
8	Zika Virus Infection	1				7	Matrix metalloproteinase-8 levels	3	153
8	Togaviridae disease	1				7	Plasma PCSK9 levels in stable coronary artery disease	3
8	Coronavirus infectious - Severe acute respiratory syndrome (SARS)	1				7	Lipoprotein level	3	93
8	Sindbis virus infection	1				7	Epiglottitis	3	154
8	Yersinia enterocolitica	1				7	Meningitis - Neonatal meningitis	3	155
8	Spotted fever	1				7	Otitis media	3	156
8	Clostridium sordellii	1				8	Posttraumatic wound infection	2
8	Protozoan Infection	1				8	Nonspecific findings on examination of blood	2
8	Infectious colitis	1				8	Total bilirubin levels	2	157
8	Neutrophil count in HIV-infection	1				8	Plasma plasminogen activator levels	2
8	Flue like - Bubonic plague	1				8	Liver enzyme levels	2	162
8	West nile encephalitis	1				8	Hemoglobin levels	2	90
8	Tick-borne encephalitis	1				8	Plasma parathyroid hormone levels	2	160, 161
8	Japanese encephalitis	1				8	Plasminogen activator inhibitor type 1 levels (PAI-1)	2	158
8	Lymphocytic colitis (watery diarrhea)	1				8	Abnormal results of other function studies (bladder, pancreas, placenta, spleen, etc)	2
8	Candidiasis	1				8	Keratitis	2	163
						8	Febrile seizures	2	164, 165
						8	Superficial cellulitis and abscess	2
						9	Vesicular Stomatitis	1
						9	Amyloid A serum levels	1
						9	Lactate dehydrogenase levels	1	16
						9	Poisoning by agents primarily affecting blood constituents	1
						9	Vitamin E levels	1
						9	D-dimer levels	1	16
						9	Purpura, Idiopathic Thrombocytopenic	1
						9	Beta-2 microglubulin plasma levels	1
						9	Postnasal drip	1
						9	Histiocytic Necrotizing Lymphadenitis	1
						9	neuro-Gamma-hydroxybutyric acidaemia	1
						9	Sinusitis	1	166
						9	Bartter syndrome (Electrolite imbalance)	1
						9	Shingles (Blister)	1
						9	Hemochromatosis	1
						9	Eustachian tube disorders	1

## Sheet: SML
Rank	Short to Mid Specific NCDs/ conditions	Count of occurrence	References			Rank	Short to Mid to long Specific NCDs/ conditions	Count of occurrence	References			Rank	Short to Mid to long (Genetic) Specific NCDs/ conditions	Count of occurrence	References
1	Hyperglycemia/Dysglycemia/ Disorder of glycosylation	4	167	Cut off 4, 3: 2 /2 X 100 = 100 %		1	Depressed mood / Depressive disorder / Mental Depression	23	30, 101	Cut off 4: 11 / 12 X 100 = 91.66 %		1	Spherocytic or hemolytic or sickle-cell anemia	5	111	Cut off 4: 1 / 4 X 100 = 25%
2	Abnormal erythrocyte morphology	3	168			2	Tuberculosis / Mycobacterial infections (Recurrent)	15	104, 105			2	Protoporphyria / Erythropoietic protoporphyria (Inherited)	4
3	Chronic ulcer	1	169			3	Myocardial infarction / Myocardial infarction (Early onset / Acute)	13	35, 106			2	Cutis laxa / Cutis laxa, x-linked	4
3	Response to stress	1	31	Accuracy: 100.00 %, at cut off 4 & 3		4	Ulcerative colitis	12	108	Accuracy: 91.66 %, at cut off 4		2	Tay Sachs disease	4		Accuracy: 25 %, at cut off 4
						5	Cerebrovascular accident / Stroke	9	110			3	Spherocytosis	3
						6	Embolism / Thrombosis	7	132			4	Oculocutaneous albinism type 1	1
						6	Cholesterol level/ Hypercholesterolemia/ Hyperlipidemia	7	93			4	Dyskeratosis	1
						6	Pulmonary sarcoidosis/fibrosis	7	175
						7	Cervical radiculitis	5
						7	Lchthyosis / Keratosis	5	133
						8	Dysmenorrhea	4	176
						8	Atopy	4	127, 128	12
						9	Dural Arteriovenous Fistula	3
						10	Pericarditis	2	174
						10	Lung Injury	2	175
						10	Lagophthalmos and other	2
						10	Cysticercosis	2
						10	Plantar warts	2
						10	Dystrophic epidermolysis bullosa	2
						10	Cellulitis and abscess of fingers/toes	2	140
						11	Forced vital capacity	1	31
						11	Cardiac repolarization	1
						11	Global electrical heterogeneity phenotypes	1
						11	Cardiac pacemaker	1
						11	Cardiac defibrillator in situ	1
						11	Autoinflammatory disorder	1
						11	Leukodystrophy	1
						11	Cerebral Ischemia	1
						11	Cerebral Infarction (stroke)	1	173
						11	Cerebral palsy	1
						11	Other paralytic syndromes	1
						11	Bronchitis (Fetid chronic)	1
						11	Berylliosis	1
						11	Visual field defect	1
						11	Cyst and pseudocyst of pancreas	1
						11	Acute periodontitis	1
						11	Ogilvie syndrome	1
						11	Urethral hypermobility	1
						11	Eczema	1
						11	Lichen sclerosis	1
						11	Essential Thrombocytemia	1
						11	Response to fenofibrate (adiponectin levels)	1
						11	Response to antineoplastic agents	1
						11	Opiates and related narcotics causing adverse effects in therapeutic use	1
						11	Response to methylphenidate treatment in ADHD (blood pressure)	1
						11	Remission after SSRI treatment in MDD or openness	1
						11	Cisplatin-induced ototoxicity	1
						11	Response to antipsychotic treatment in schizophrenia (working memory)	1
						11	Response to tocilizumab in rheumatoid arthritis	1
						11	Menstruation disorder	1
						11	Immunosuppression	1

## Sheet: ML
Rank	Mid to long Specific infectious diseases	Count of occurrence	References			Rank	Mid to long Specific non-infectious diseases	Count of occurrence	References			Rank	Mid to long (Genetic) Specific non-infectious diseases	Count of occurrence	References
1	Hepatitis C	21	102	Cut off 4, 3: 3 / 3 X 100 = 100 %		1	Lupus erythematosus (Systemic)	29	100	Cut off 4: 41 / 49 X 100 = 83.67 %		1	Ceroid lipofuscinosis neuronal	19		Cut off 4: 1 / 3 X 100 = 33.33 %
2	HIV	8	25			2	Breast cancer / Sporadic Breast cancer	20	75			2	C1q Deficiency	8
3	Hepatitis B virus infection/ susceptibility	4	102			3	Arthritis / Rheumatoid Arthritis	19	103			3	Long QT Syndrome	4	119
4	Melioidosis	1		Accuracy: 100 %, at cut off 4 & 3		4	Asthma (Acute/ Allergic)	18	10, 77	Accuracy: 83. 67 %, at cut off 4		4	Papillon Lefevre syndrome	2		Accuracy: 33.33 %, at cut off 4
						5	Liver cancer	17	78			5	Polyglandular syndrome type 1	1
						6	Diabetes type 1 / type 2	14	82			5	Polyglandular syndrome type 2	1
						7	Macular degeneration / Macular degeneration (Age-related)	13	80			5	Familial idiopathic basal ganglia calcification	1
						7	Chronic Kidney Disease	13	56, 57			5	Spinocerebellar ataxia type 17	1
						8	Arteriosclerosis	12	107
						9	Liver Cirrhosis	11	12, 109
						10	Other autoimmune diseases	10	49
						11	Endometrial cancer	9
						11	Pain / Possible neuropathic pain	9	18
						11	Chronic Obstructive Airway Disease / COPD	9	86
						12	Multiple myeloma	8	112
						12	Hypertensive disease	8	9, 113
						12	Dermatomyositis (Amyopathic / Childhood Type)	8	131
						13	Nervous system Brain Neoplasms/Glioblastoma/Glioma	7	188
						13	Metabolic Syndrome X	7	51, 114
						13	Inflammatory Bowel Diseases (IBD)	7	95
						14	Carotid Atherosclerosis	6	107
						14	Lupus erythematosus (Discoid)	6	100
						14	Osteoporosis	6	91
						15	Cervical cancer	5
						15	Ovarian cancer	5	14
						15	Nasopharyngeal carcinoma	5
						15	Prostate cancer (early onset)	5	115
						15	Other cardiomyopathy	5	15
						15	Psoriasis / Psoriasis vulgaris / Psoriasis and related disorders	5	116
						15	Adjustment reaction	5	208
						15	Glomerulonephritis	5	209
						16	Leukemia / CLL	4	117, 118
						16	Colorectal cancer	4	87
						16	Melanoma	4
						16	Malignant germ cell tumor	4
						16	Aneurysm (Aortic/ Thoracic / Abdominal)	4	138
						16	Infectious myocarditis	4	136, 137
						16	Neuromyelitis optica	4	126
						16	Multiple Sclerosis	4	181
						16	Unverricht-Lundborg disease	4
						16	Pigmented villonodular synovitis	4
						16	Myositis (Infectious / Focal)	4	139
						16	Secondary hyperparathyroidism of renal origin	4
						16	Amyloidosis (Aquired)	4	182
						16	Language disorder - Aphasia	4	184, 185
						16	Dementia / Alzheimer's Disease	4	120
						16	Schizophrenia	4	121
						16	Crohn's disease	4	172
						16	Diabetic kidney disease / Diabetic Nephropathy	4	124
						17	Cartilaginous cancer/ Chondroma / Enchondroma	3
						17	Graves' disease	3
						17	Dancing feet syndrome	3
						17	CREST Syndrome	3
						17	Polycystic lipomembranous osteodysplasia with sclerosing leukoencephalopathy	3
						17	Other persistent mental disorders	3
						17	Retinal detachments / Separation of retinal layers	3
						17	Cataract	3
						17	Dental cavity	3
						17	Renal failure (Acute / NOS)	3	21
						17	Other liver disease	3	58
						17	Abscess or ulceration of vulva	3
						18	Lymphoma	2
						18	Nervous system Anaplastic Oligoastrocytoma	2
						18	Larynx cancer	2
						18	Sarcoma / Fibrosarcoma	2
						18	Bone mineral density	2
						18	Giant cell arteritis	2
						18	Arrhythmogenic right ventricular dysplasia	2
						18	Immunodeficiency	2
						18	Parkinson disease	2
						18	Moyamoya disease	2
						18	Other allied disorders of spine	2
						18	Episodic ataxia	2
						18	Muscular dystrophy	2
						18	Degenerative polyarthritis	2
						18	Schmorl's nodes	2
						18	Hypothyroidism	2
						18	Corrected insulin response	2
						18	Obesity	2	14
						18	Bipolar disorder	2
						18	Peripheral retinal degenerations	2
						18	Vitreoretinopathy	2
						18	Barrett's esophagus	2
						18	Bilirubin excretion disorder	2
						18	Alcoholic liver damage	2
						18	POEMS Syndrome	2
						18	Alcohol consumption	2
						18	Hernia	2
						19	Myeloproliferative disease	1
						19	Neoplasm of uncertain behavior	1
						19	Nervous system Neurofibromatosis	1
						19	Nervous system Neuroma / Acoustic neuroma	1
						19	Esophagal cancer	1
						19	Pharynx cancer	1
						19	Squamous cell carcinoma of mouth	1
						19	Squamous cell carcinoma of the head and neck	1
						19	Rectosigmoid neoplasm	1
						19	Angiokeratoma	1
						19	Cylindrocarcinoma	1
						19	Nevus (type of Skin cancer)	1
						19	Skin cancer (Secondary malignant neoplasm of skin)	1
						19	Lung cancer	1
						19	Muir-Torre syndrome	1
						19	Pancreatic cancer	1
						19	Urothelial carcinoma in situ	1
						19	Bone-marrow foam cells	1
						19	Tachycardia	1	23
						19	Blond vs. brown hair color	1
						19	Disorders of cervical region	1
						19	Peripheral angiopathy	1
						19	Vasospasm, Intracranial	1
						19	Cardiac Hypertrophy	1
						19	Nonrheumatic mitral valve disorders	1
						19	Autoimmune enteropathy	1
						19	Polymyalgia Rheumatica	1
						19	Myasthenia gravis	1
						19	Antisynthetase syndrome	1
						19	Celiac disease	1
						19	Simian Acquired Immune Deficiency Syndrome	1
						19	Lung transplant rejection	1
						19	Motor neuron atrophy- Amyotrophic lateral sclerosis	1
						19	Huntington disease	1
						19	Whole-brain volume (Alzheimer's disease interaction)	1
						19	Periventricular leukomalacia	1
						19	Facial nerve disorders [CN7]	1
						19	Nerve plexus lesions	1
						19	Neurological pain disorder	1	18
						19	Dermatomyositis	1	131
						19	Arthritis - Felty's syndrome	1
						19	Osteoarthritis	1	200
						19	Gout and other crystal arthropathies	1
						19	Polymyositis, Idiopathic	1
						19	Polymyositis Ossificans	1
						19	Nemaline myopathy	1
						19	Unequal leg length (acquired)	1
						19	Ulnar bowing	1
						19	Bone necrosis	1
						19	Pseudoepiphyses of the metacarpals	1
						19	Fibrodysplasia ossificans progressiva	1
						19	Palmar fascia	1
						19	Osteopenia	1	91
						19	Fracture of ribs	1
						19	Fracture of pelvis	1
						19	Fractures	1
						19	Fibrous dysplasia	1
						19	Fracture of femur	1
						19	Maffucci syndrome	1
						19	Increased endomysial connective tissue	1
						19	Contracture	1
						19	Slender build	1
						19	Formal thought disorder in schizophrenia	1
						19	Memory performance	1
						19	Relative hand skill in reading disability	1
						19	Psychogenic and somatoform disorders	1
						19	Psychomotor deterioration	1
						19	Epilepsy-endocrine disorders	1
						19	Phencyclidine-Related Disorders	1
						19	Central hypoventilation syndrome	1
						19	Acute laryngitis and tracheitis	1
						19	Retinal vascular changes and abnomalitie	1
						19	Eales disease	1
						19	Periapical Abscess	1
						19	Geographic tongue	1
						19	Collagenous colitis	1
						19	Serrated polyp	1
						19	Distal Renal Tubular Acidosis	1
						19	Cyst of kidney, acquired	1
						19	Renal rickets	1
						19	Other disorders of prostate	1
						19	Geroderma osteodysplasticum (skin wrinkling)	1
						19	Microvesicular hepatic steatosis	1
						19	Cholestasis	1
						19	Phencyclidine Abuse	1
						19	Cocaine dependence	1
						19	Suicide behavior	1
						19	Eating disorders (purging via substances)	1
						19	Leisure-time exercise behaviour	1
						19	Allergies	1	140
						19	Leydig cells hypoplasia	1
						19	Erectile dysfunction in type 1 diabetes	1
						19	Alopecia	1	202

## Sheet: C
Rank	Congenital or Genetic Specific non-infectious diseases	Count of occurrence	References
1	Congenital hemolytic anemia / dyserythropoietic anemia/ thalassemia	9	111	Cut off 4: 4 / 10 X 100 = 40 %
2	Congenital disorders of glycosylation / Congenital porphyria	6	167
3	Occipital horn syndrome	5
4	Gangliosidosis GM1 type 3	4		Accuracy: 40 %, at cut off 4
4	Sandhoff disease	4
4	Beta-galactosidase-1 deficiency	4
4	Intellectual disability - Aicardi-Goutieres Syndrome/ Down syndrome/ Atkin syndrome	4	193
4	Cleft palate / bilateral cleft lip	4
4	Congenital coagulation defects	4	194
4	Genital organ defects	4
5	Ceroid storage disease	3
5	Aspartylglucosaminuria	3
6	Adrenoleukodystrophy	2
6	Paget disease of bone familial	2	199
6	Asperger syndrome	2
6	Autism spectrum disorder	2	88, 89
6	Forehead morphology	2
6	Microcephaly	2
6	Arthrogryposis	2
6	Limbs defect	2
6	Cystic fibrosis	2	197, 198
6	Rhizomelic chondrodysplasia punctata	2
6	Fetal hemoglobin quantitative trait locus	2
6	Elliptocytosis, Hereditary / Familial erythrocytosis 1	2
7	Bare lymphocyte syndrome	1
7	Hemophagocytic lymphohistiocytosis	1
7	Pontocerebellar Hypoplasia Type 1	1
7	Canavan disease	1
7	Aicardi syndrome	1
7	Schwartz Jampel syndrome type 1	1
7	Melnick-Needles syndrome	1
7	Hereditary Connective Tissue Disorder	1
7	Lower limb spasticity - spastic paraplegia	1
7	Sclerosteosis	1
7	Clayton-Smith Donnai syndrome	1
7	Alpha-1 anti-trypsin deficiency	1
7	Type 1 plasminogen deficiency	1
7	Polydactyly	1
7	Zechi Ceide syndrome	1
7	Congenital hypoplasia of femur	1
7	Adducted thumb	1
7	Hemoglobinopathy - Sickle cell anemia	1
7	Congenital anomalies of the eye	1
7	Congenital euryblepharon	1
7	Kabuki syndrome eyelids	1
7	Lissencephaly	1
7	Brain-Leukomalacia	1
7	Xeroderma pigmentosum	1
7	Rothmund Thomson syndrome	1
7	Parental lifespan	1
7	Conotruncal heart malformations	1
7	X-linked adrenal hypoplasia congenita	1
7	Tetraploidy	1
7	Shallow anterior chamber of eye	1
7	Treacher Collins syndrome	1
7	Disorders of tooth development	1
7	Hereditary spherocytosis	1
